# Supplementary material for: MED19 alters AR occupancy and gene expression in prostate cancer cells, driving MAOA expression and growth under low androgen
Source: PubMed Central journal article supplement (PMC7875385; doi:10.1371/journal.pgen.1008540), 2021-01-29
Supplement: pgen.1008540.s007.pdf [file pgen.1008540.s007.pdf]

# S7 Fig

A

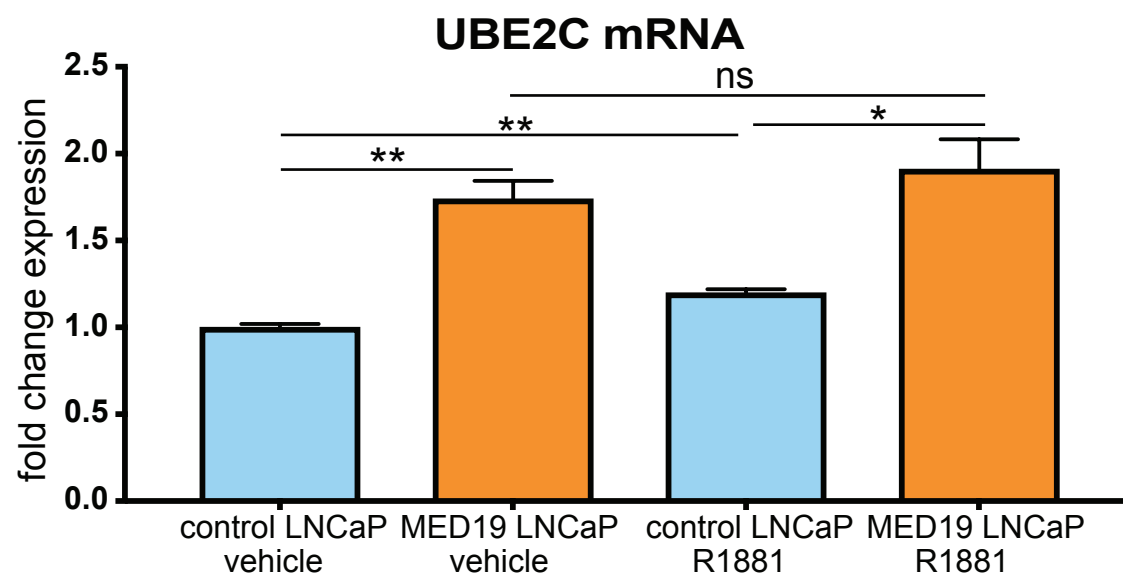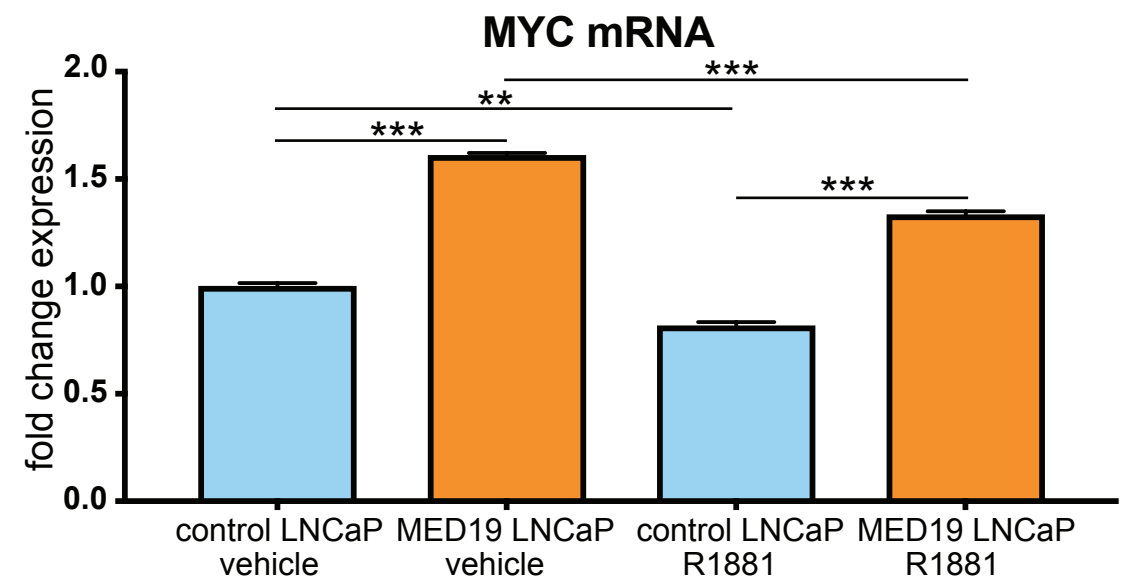

B

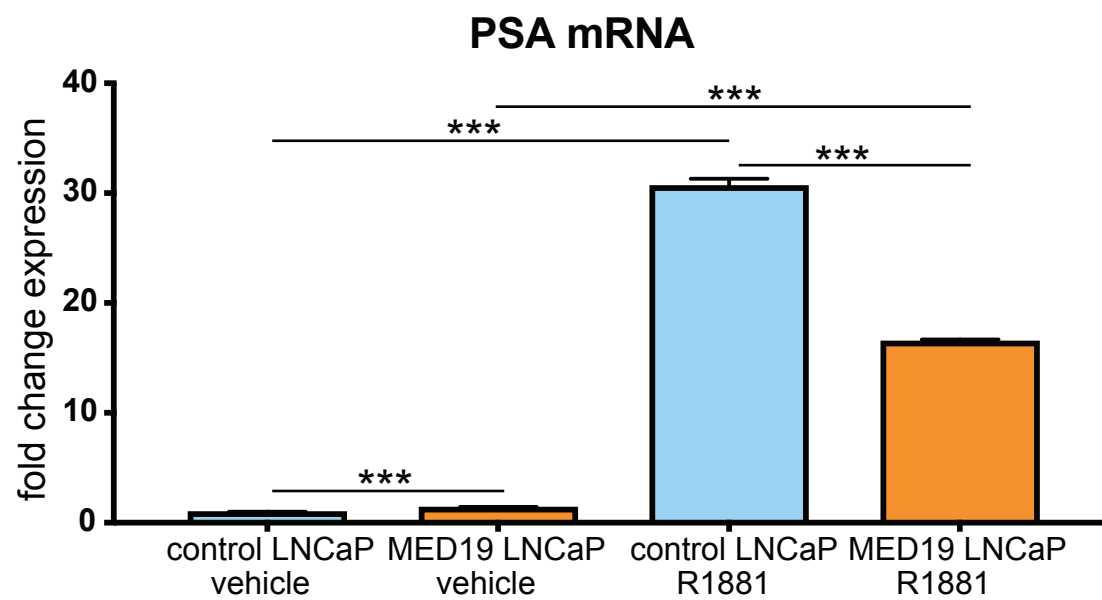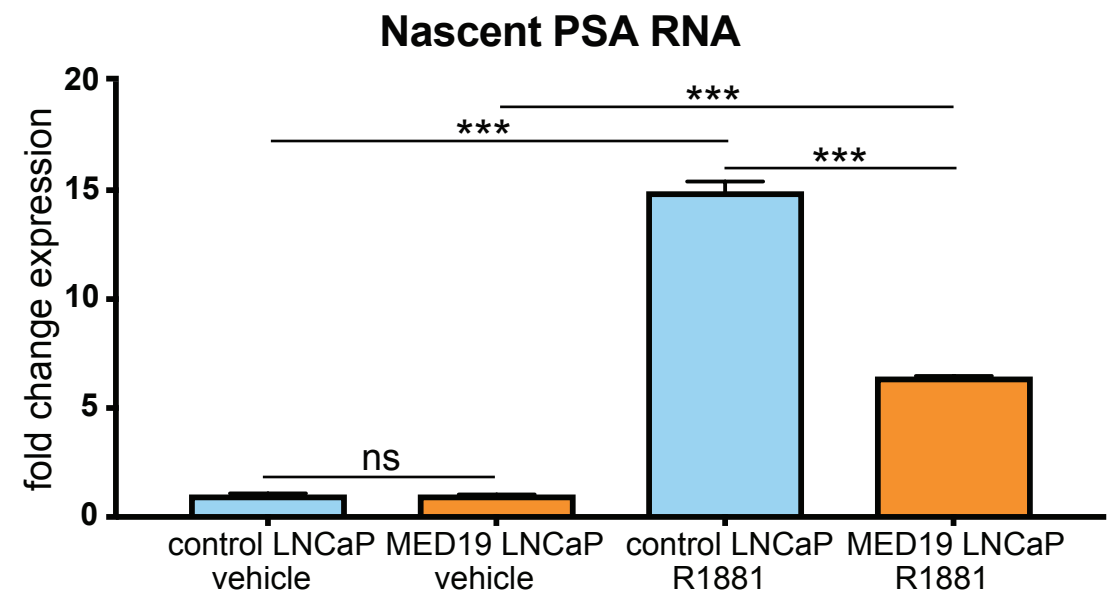

C

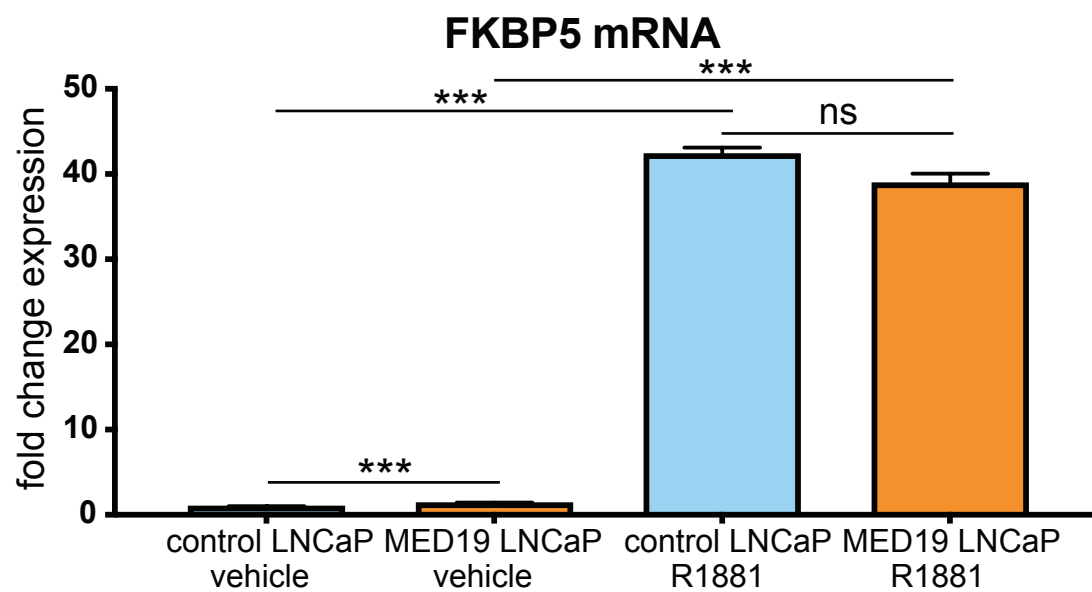

D

|                                    |
|------------------------------------|
| ↑ Upregulated                      |
| <i>UBE2C, MYC, IGFBP5, TSC22D1</i> |
| ↓ Downregulated                    |
| <i>PSA, IRS2, PMEPA1</i>           |
| ∅ Unchanged                        |
| <i>FKBP5, NKX3.1, STK39</i>        |
