# Supplementary material for: MED19 alters AR occupancy and gene expression in prostate cancer cells, driving MAOA expression and growth under low androgen
Source: PubMed Central journal article supplement (PMC7875385; doi:10.1371/journal.pgen.1008540), 2021-01-29

# S10 Fig

A

## AR sites

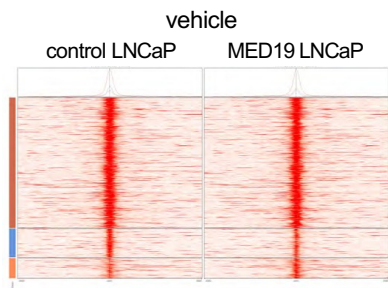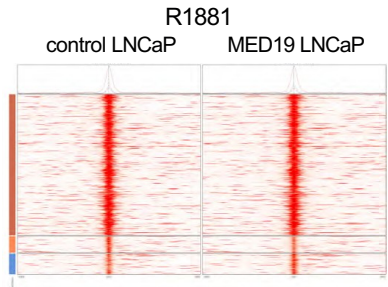

B

## H3K27ac sites

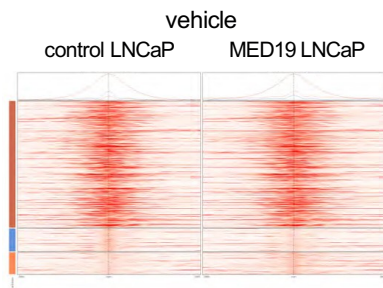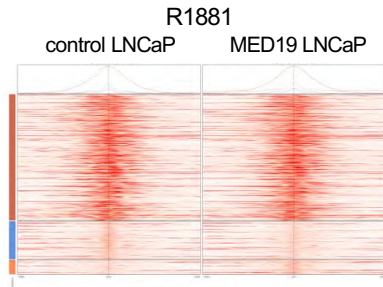

C

## AR-FLAG-MED19 sites

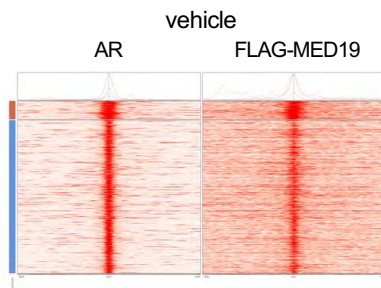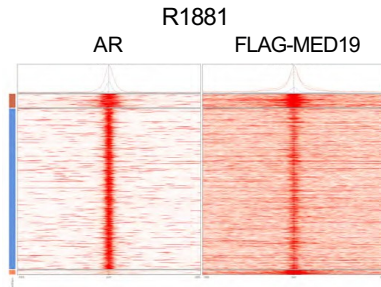

D

## AR-FLAG-MED19-H3K27ac sites

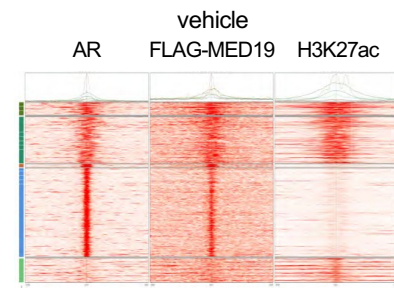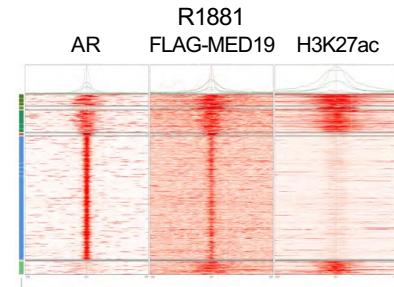

Heat map  
Y axis key

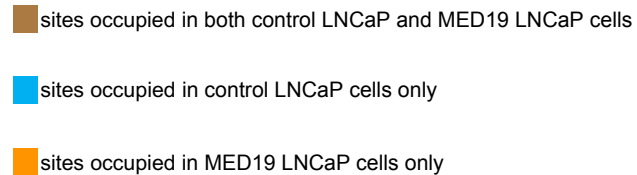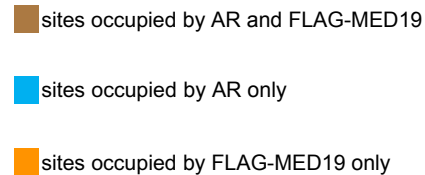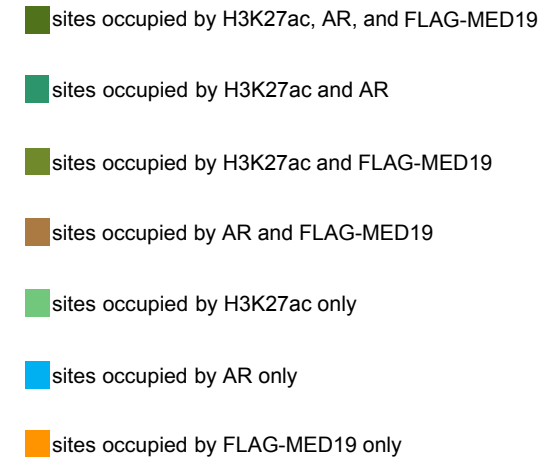

Supplement: pgen.1008540.s010.pdf [file pgen.1008540.s010.pdf]
