# Supplementary material for: MED19 alters AR occupancy and gene expression in prostate cancer cells, driving MAOA expression and growth under low androgen
Source: PubMed Central journal article supplement (PMC7875385; doi:10.1371/journal.pgen.1008540), 2021-01-29

# S11 Fig

A

## LRRTM3 mRNA expression

RNA-seq

| LRRTM3                                | Vehicle              | R1881              |
|---------------------------------------|----------------------|--------------------|
| Fold Change with MED19 overexpression | 4.46                 | 1.60               |
|                                       | <b>Control LNCaP</b> | <b>MED19 LNCaP</b> |
| Fold Change with R1881 treatment      | -4.48                | -15.43             |

qPCR

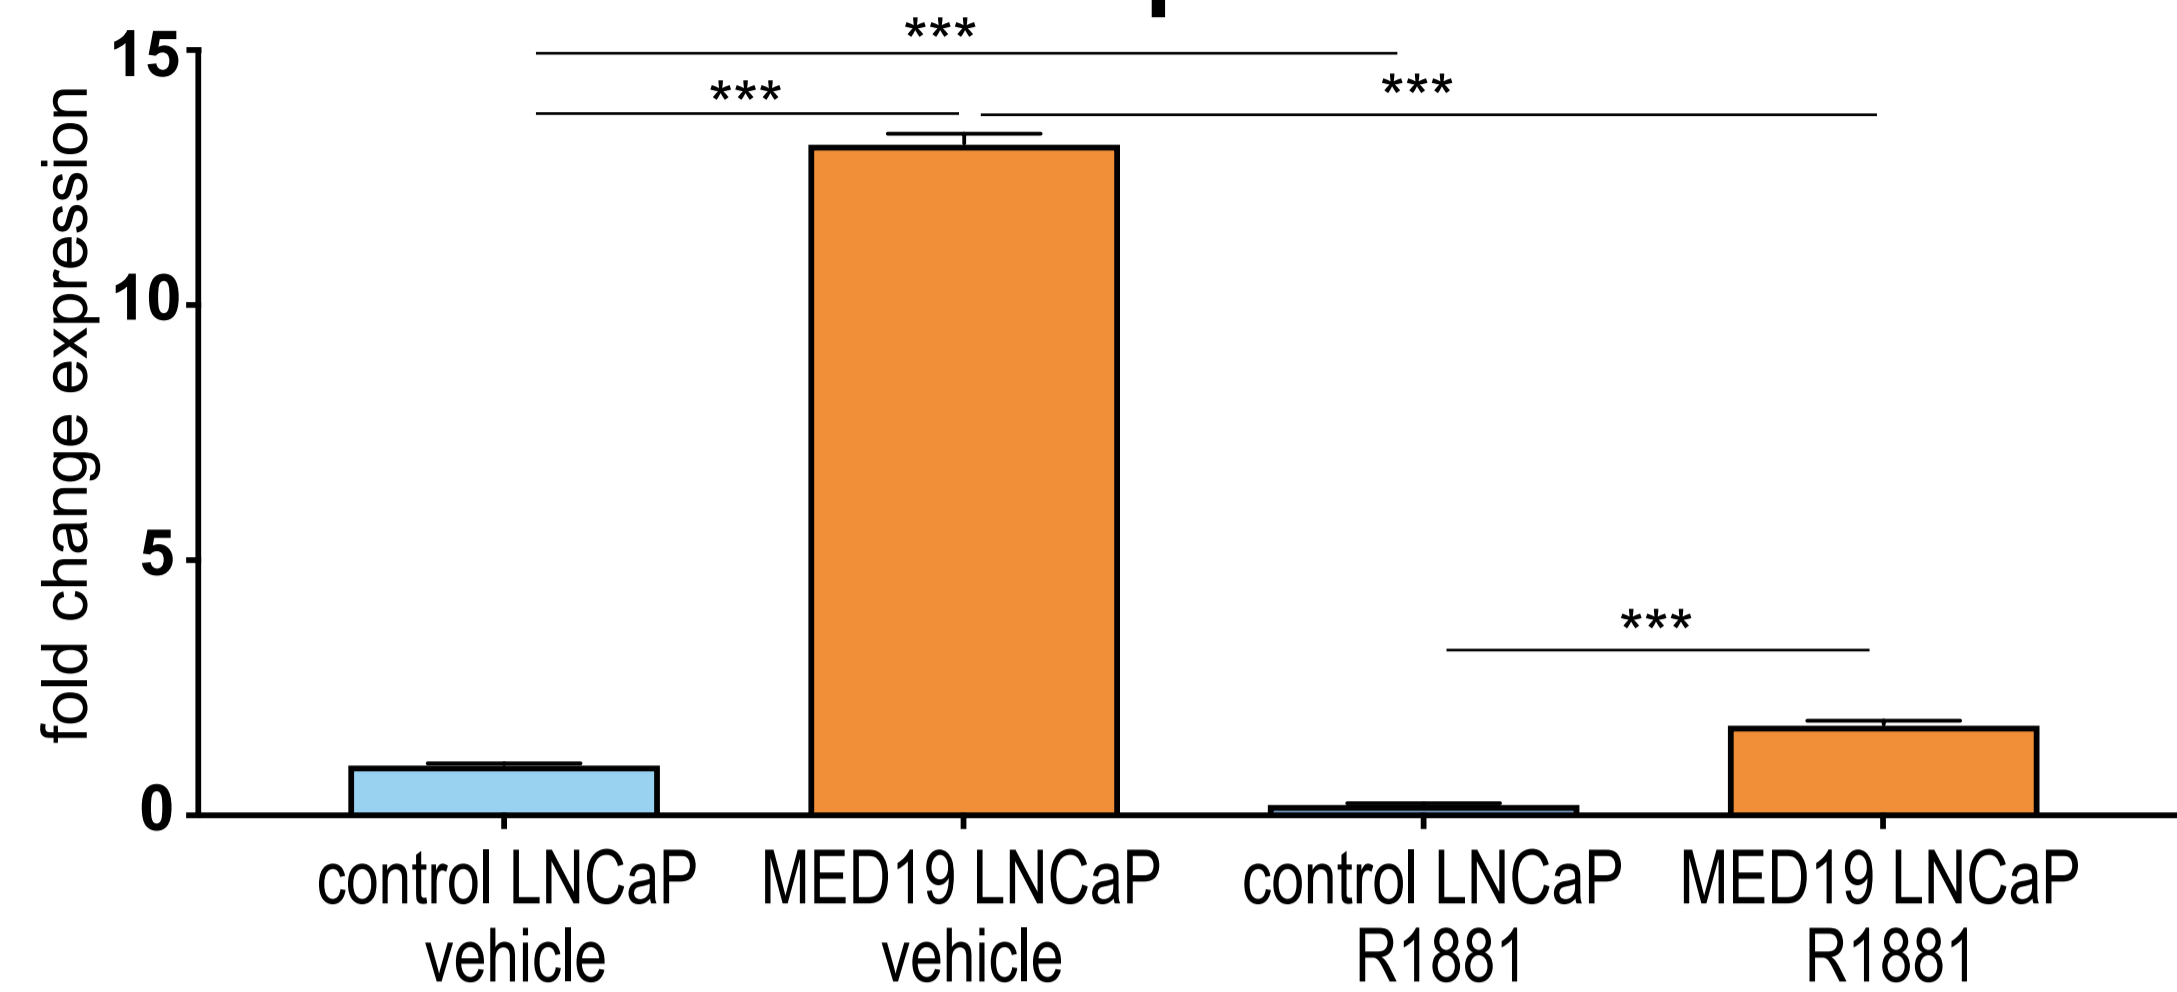

B

## LRRTM3 gene

Androgen deprivation

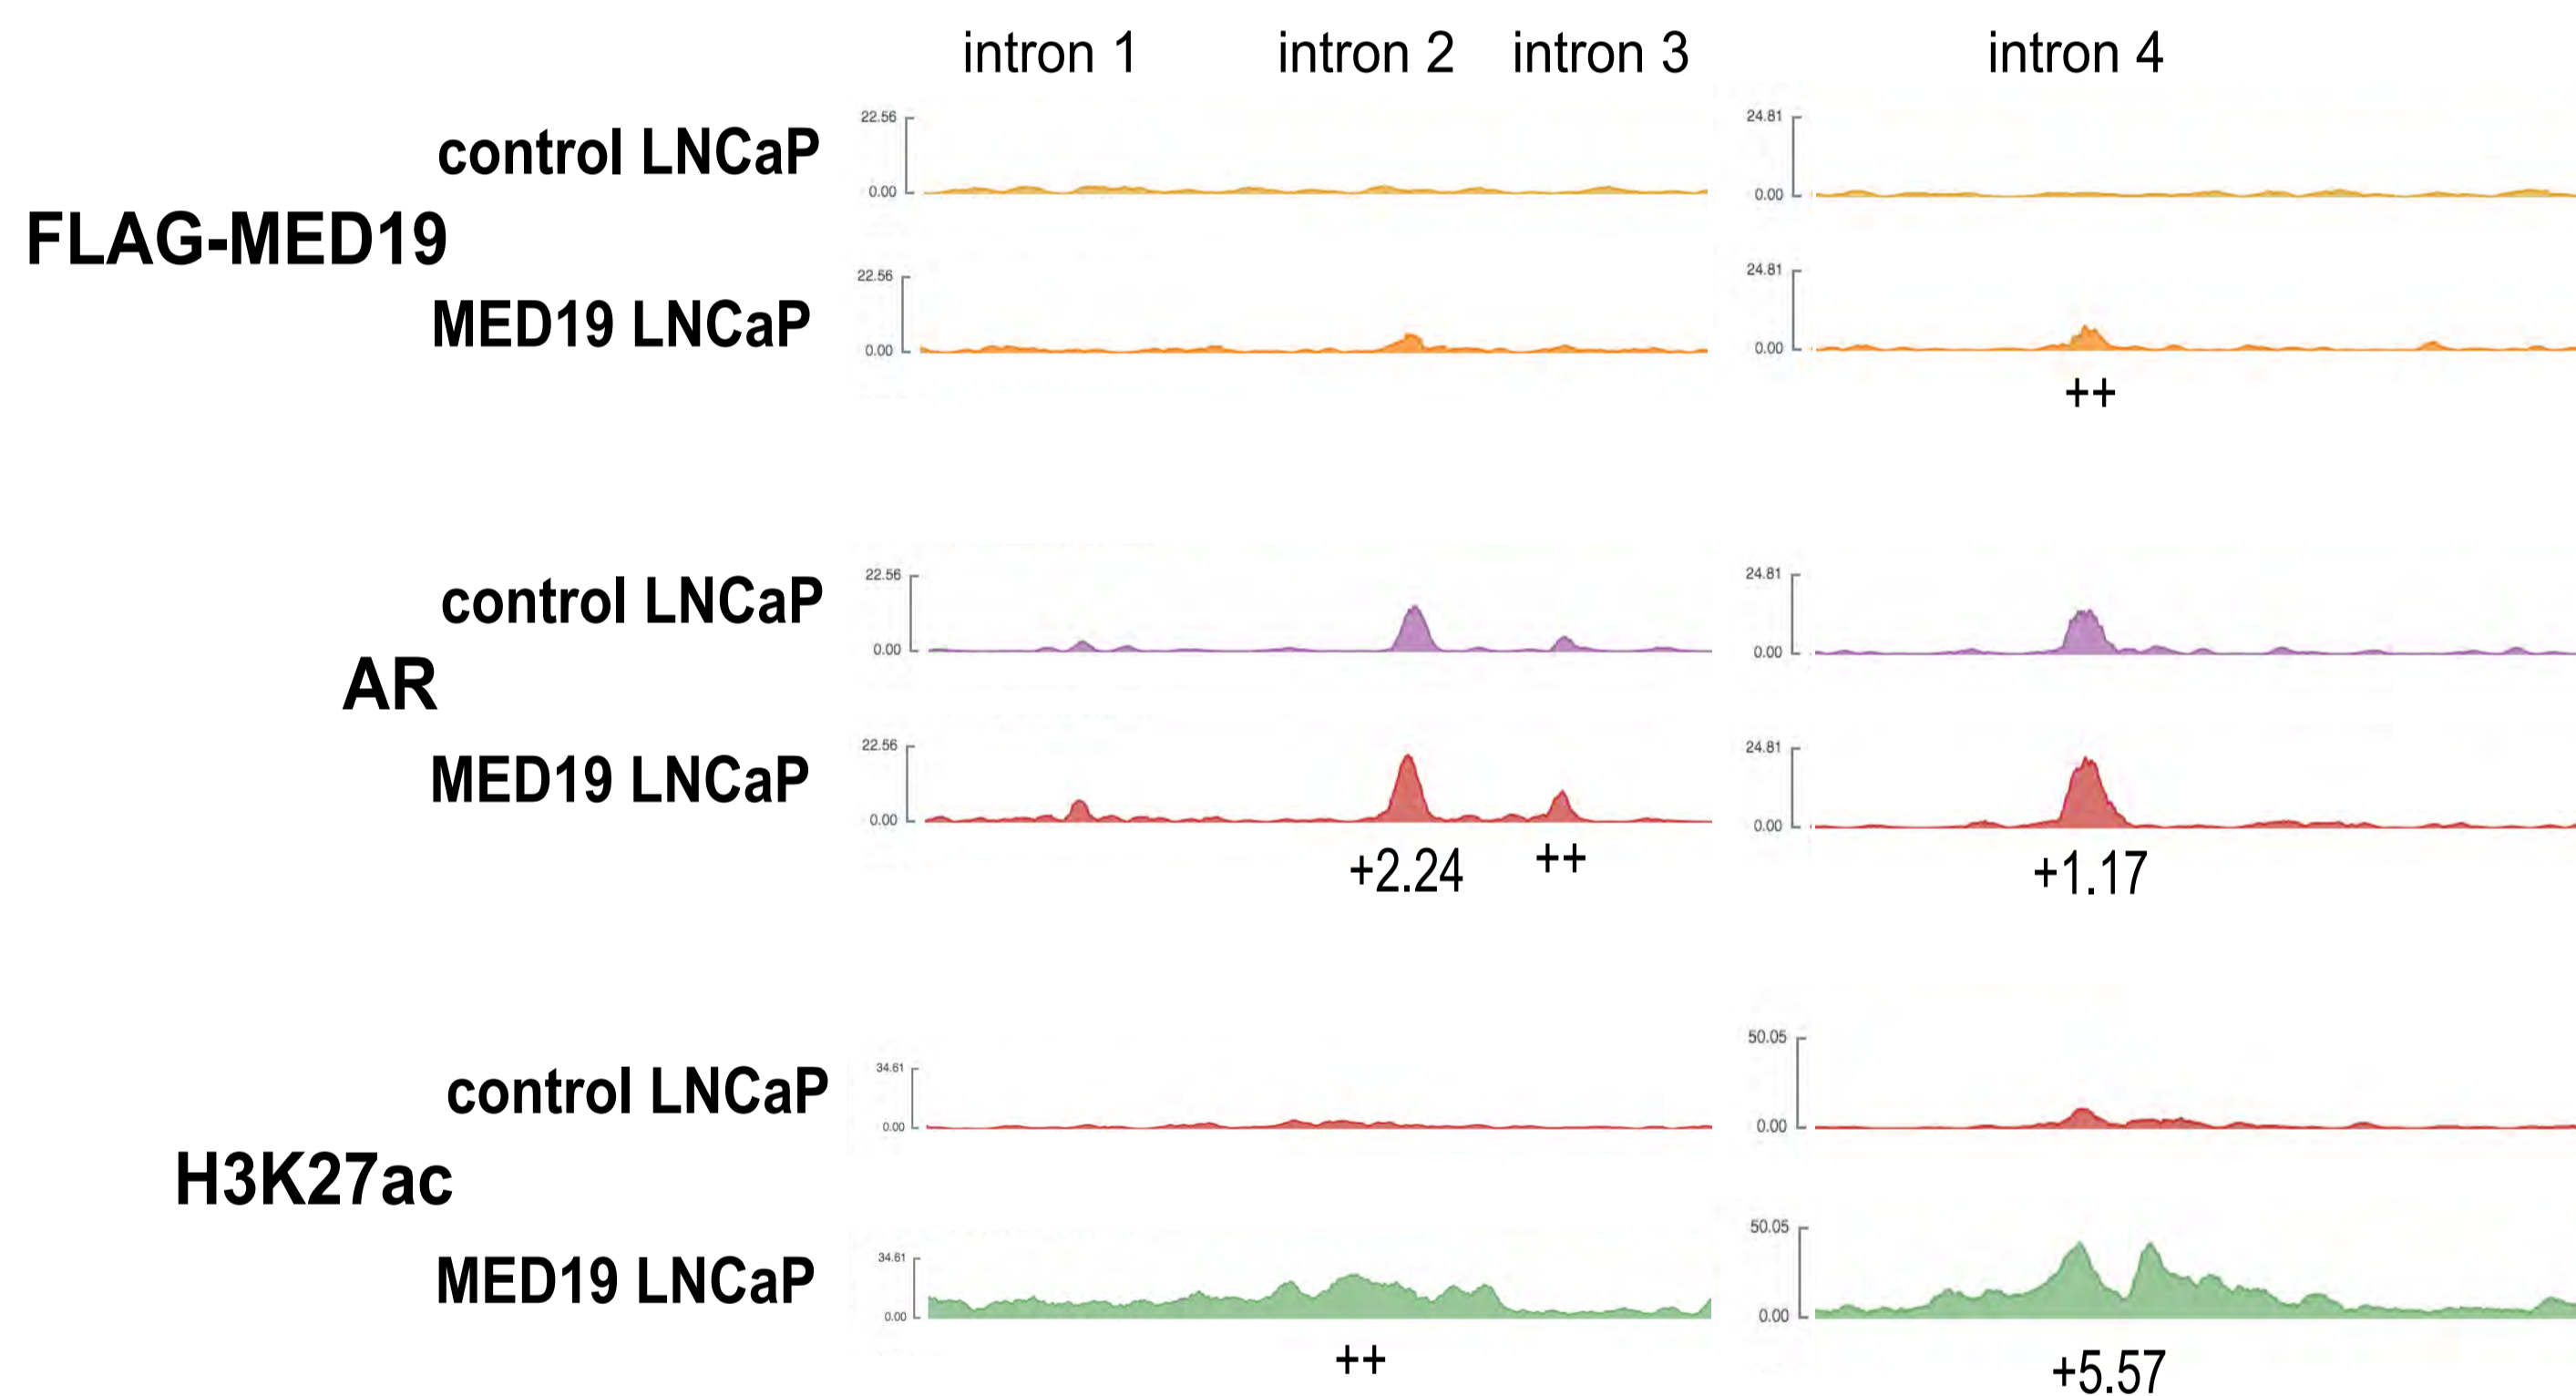

R1881 Treatment

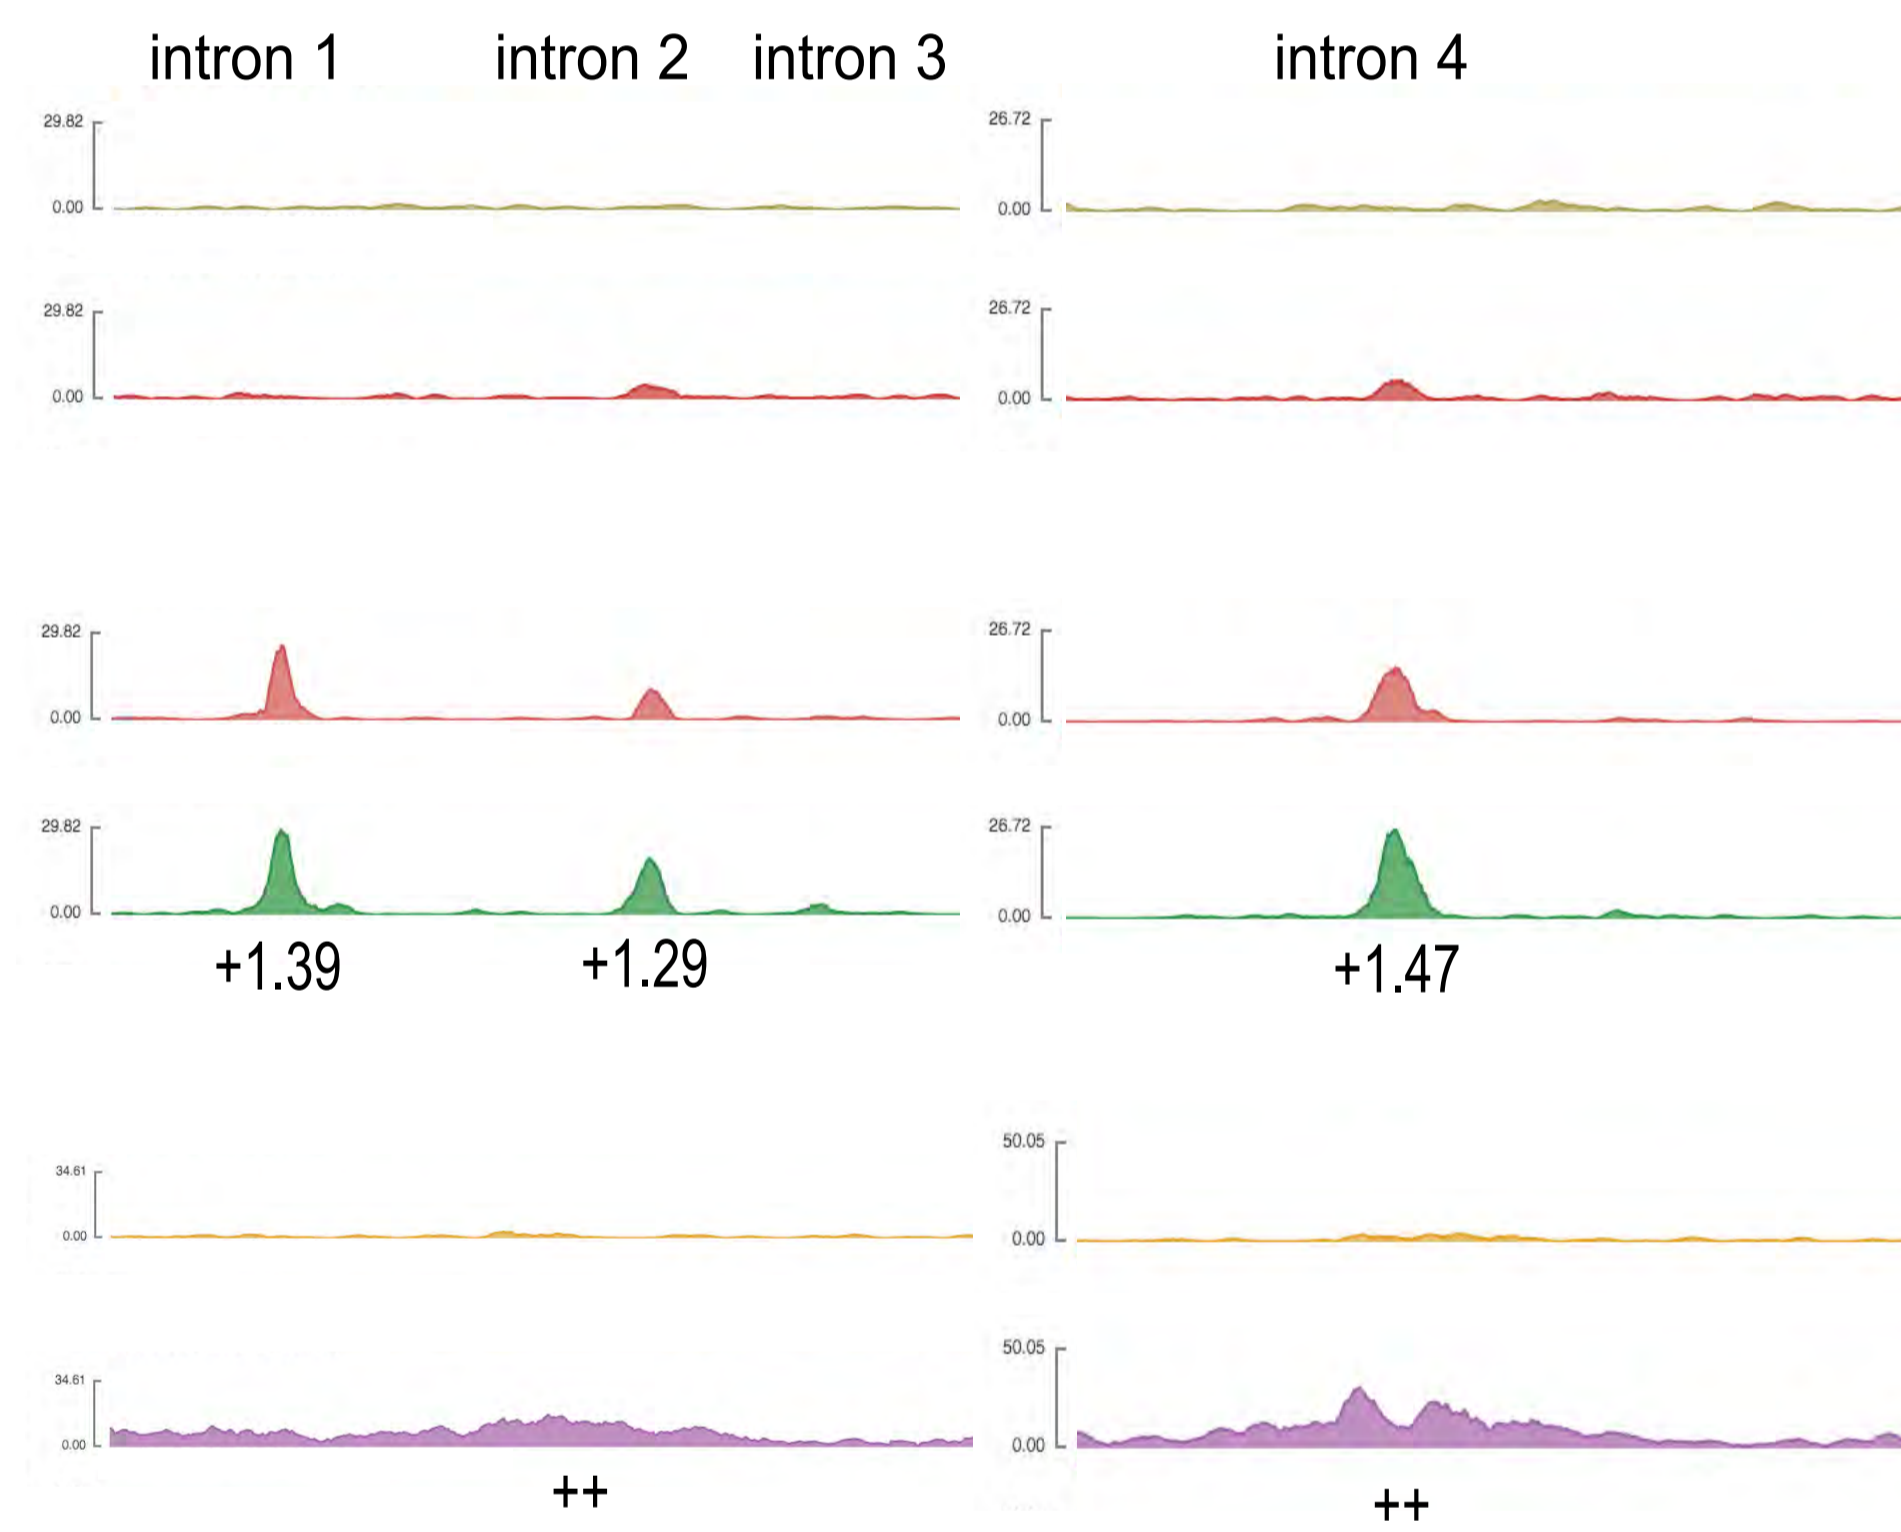

C

Androgen Deprivation  
MED19 LNCaP

Proliferation

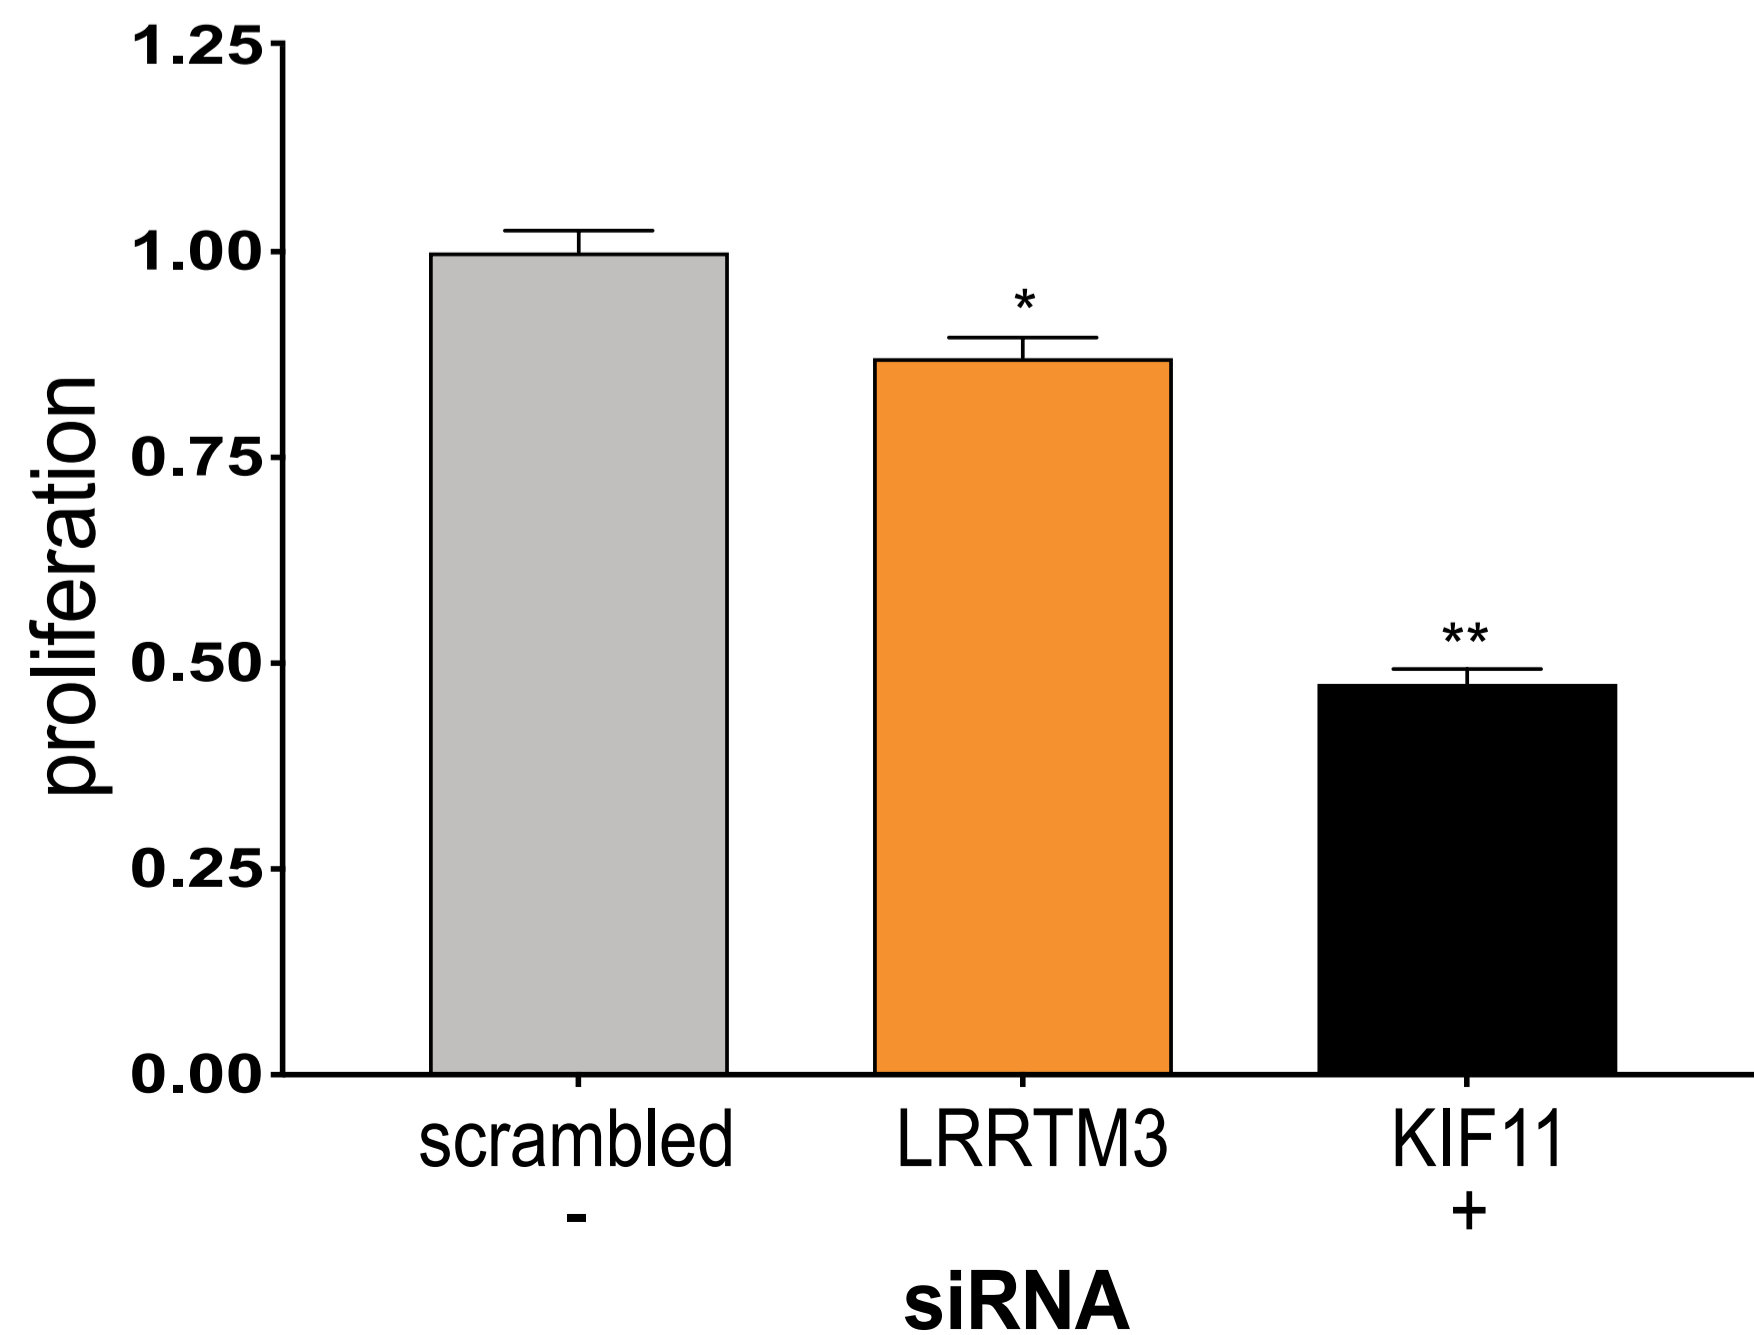

Supplement: pgen.1008540.s011.pdf [file pgen.1008540.s011.pdf]
