# Supplementary material for: MED19 alters AR occupancy and gene expression in prostate cancer cells, driving MAOA expression and growth under low androgen
Source: PubMed Central journal article supplement (PMC7875385; doi:10.1371/journal.pgen.1008540), 2021-01-29

# S12 Fig

A

## MAST4 mRNA expression

RNA-seq

| <b>MAST4</b>                          | <b>Vehicle</b>       | <b>R1881</b>       |
|---------------------------------------|----------------------|--------------------|
| Fold Change with MED19 overexpression | -2.37                | -2.29              |
|                                       | <b>Control LNCaP</b> | <b>MED19 LNCaP</b> |
| Fold Change with R1881 treatment      | -1.65                | -1.41              |

qPCR

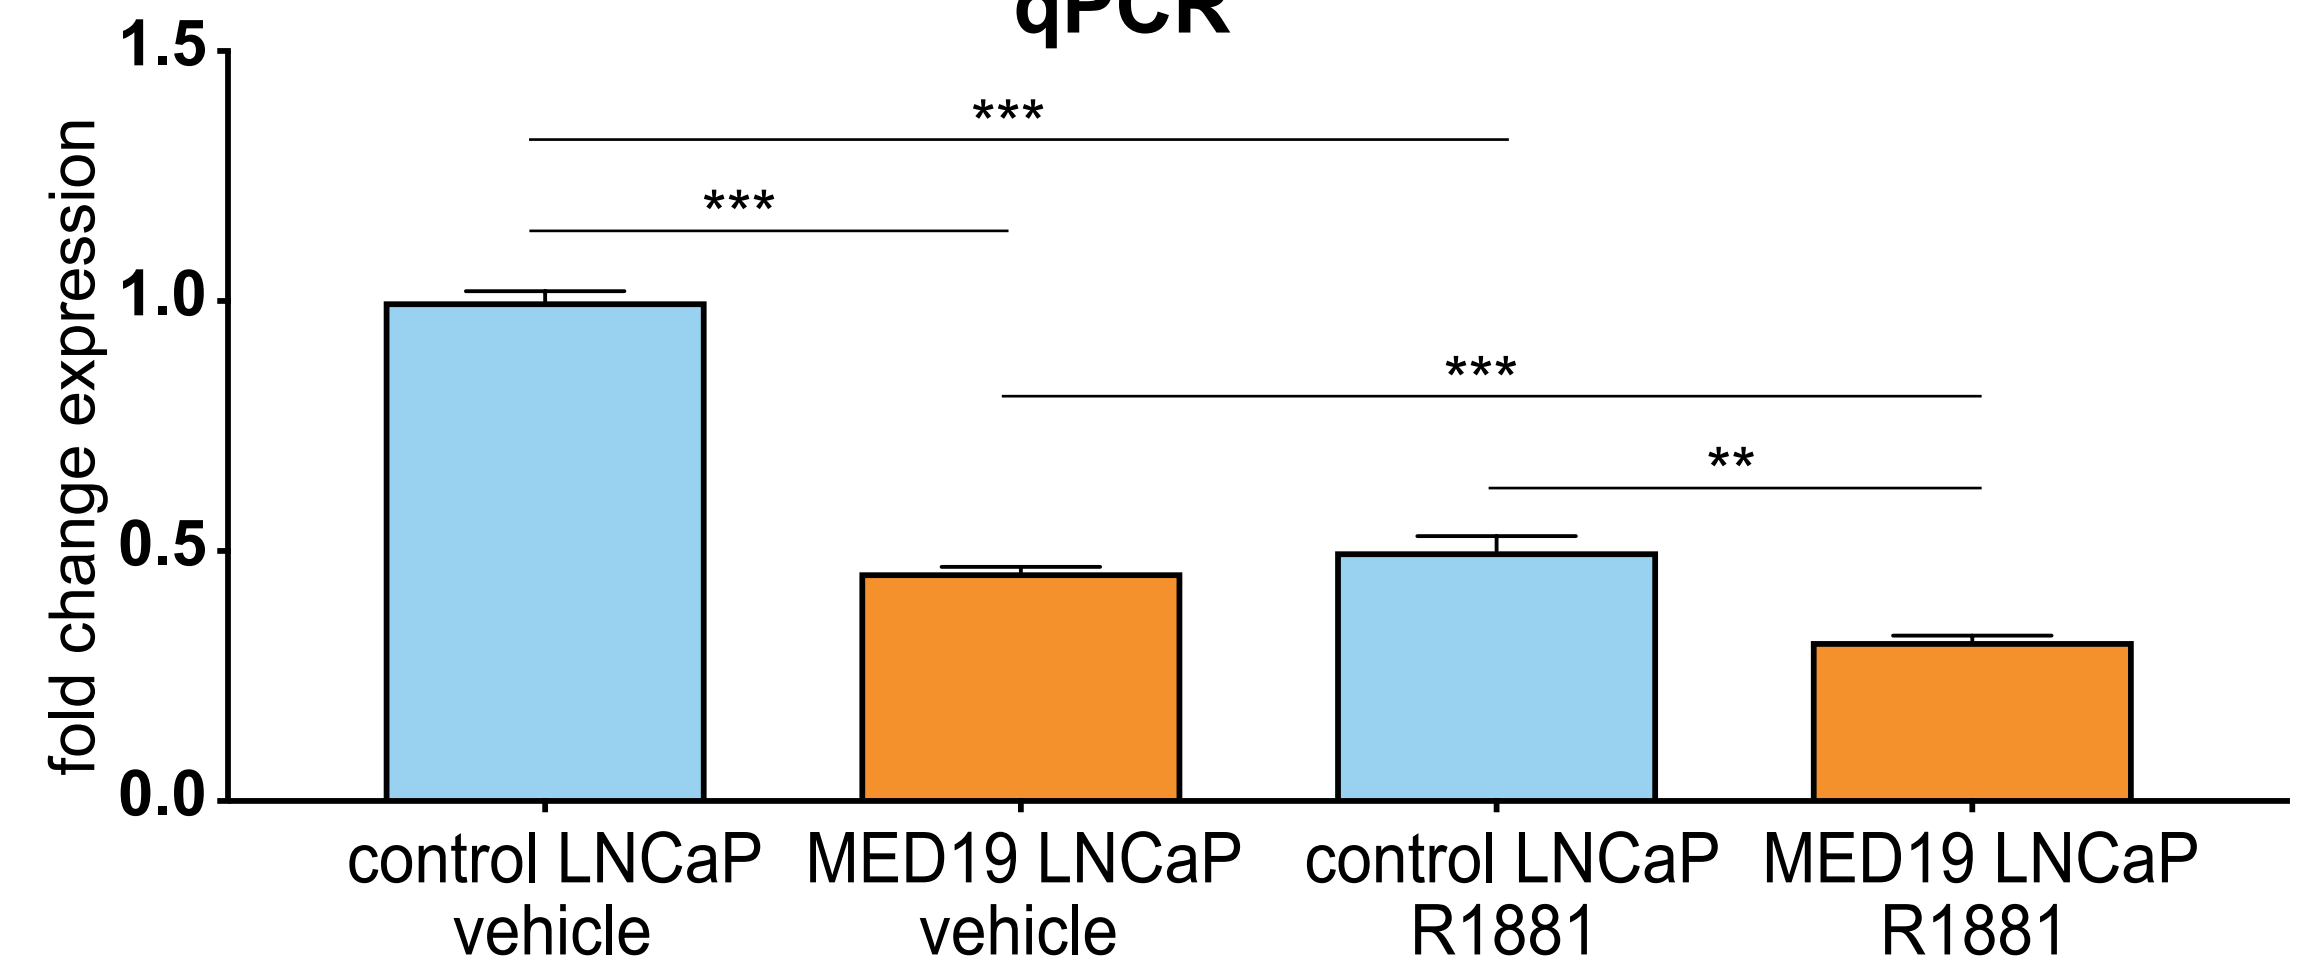

B

## MAST4 gene

Androgen deprivation

R1881 treatment

control LNCaP  
**FLAG-MED19**

MED19 LNCaP

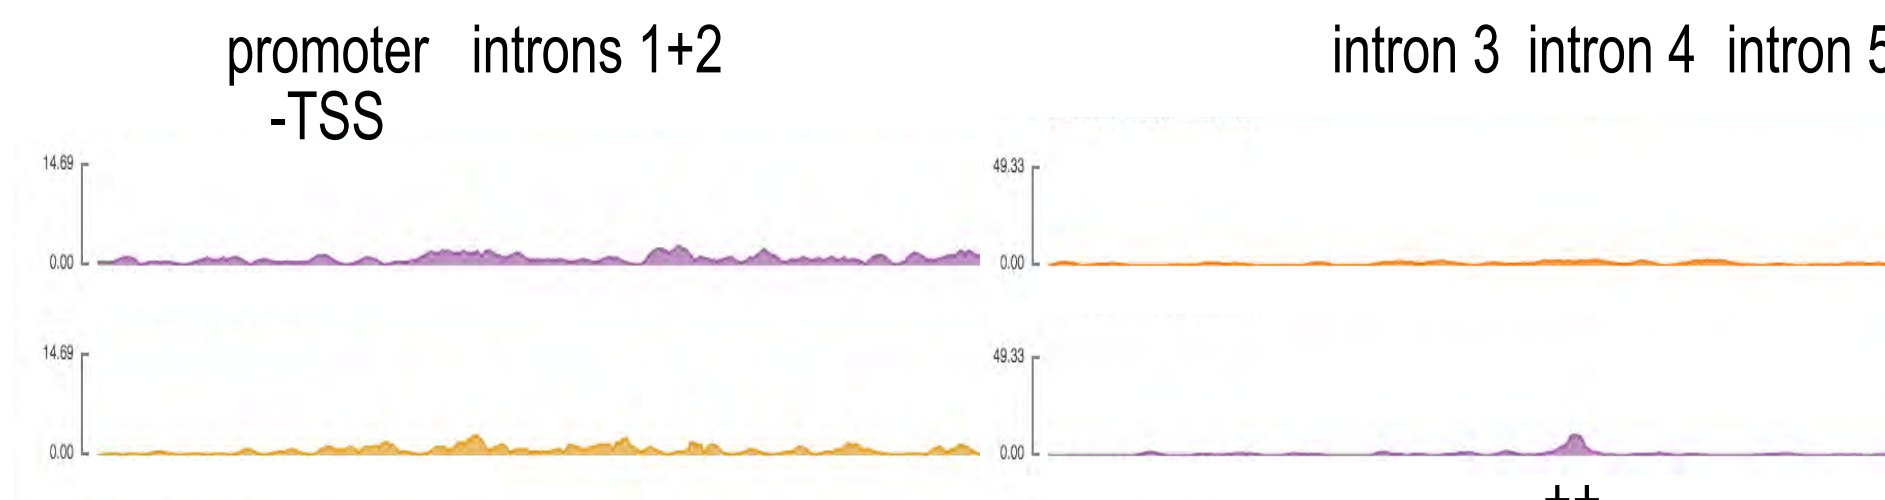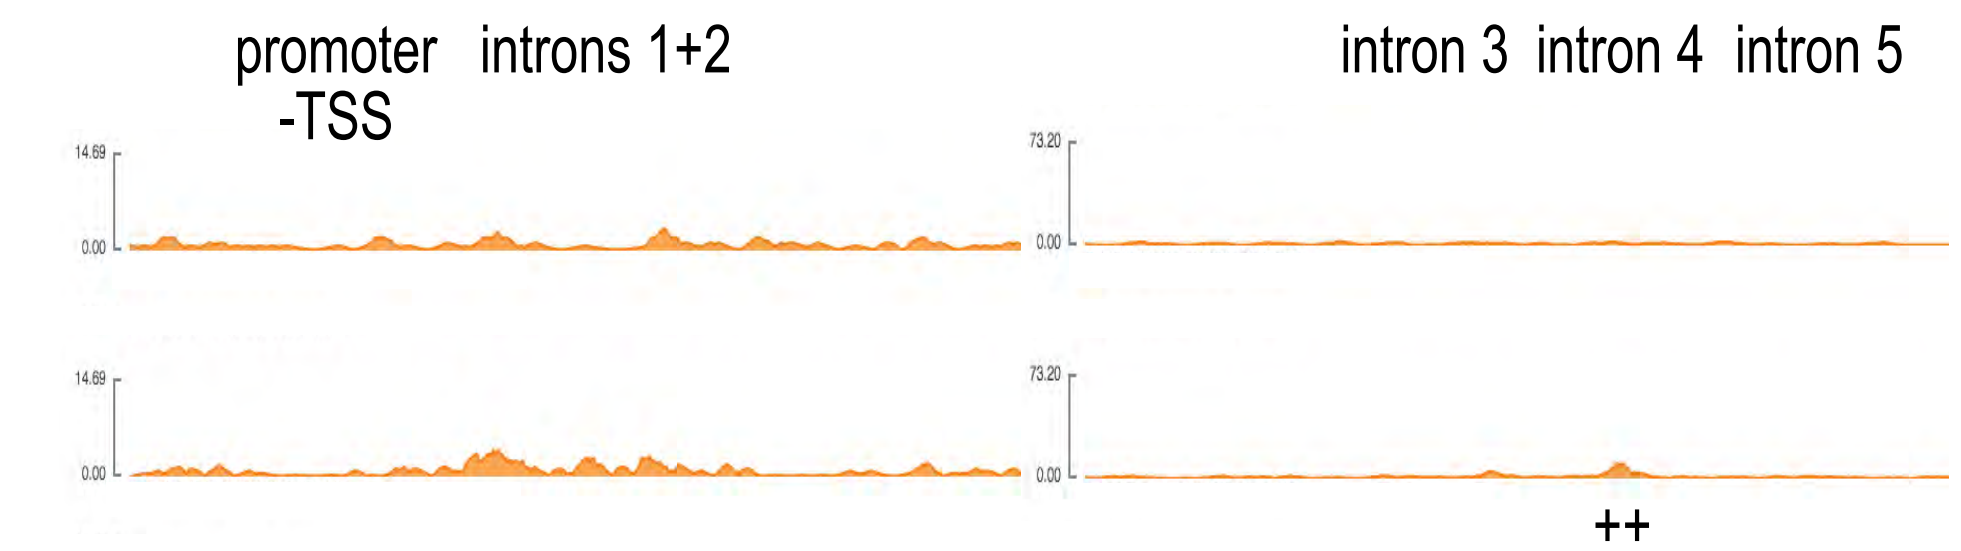

control LNCaP  
**AR**

MED19 LNCaP

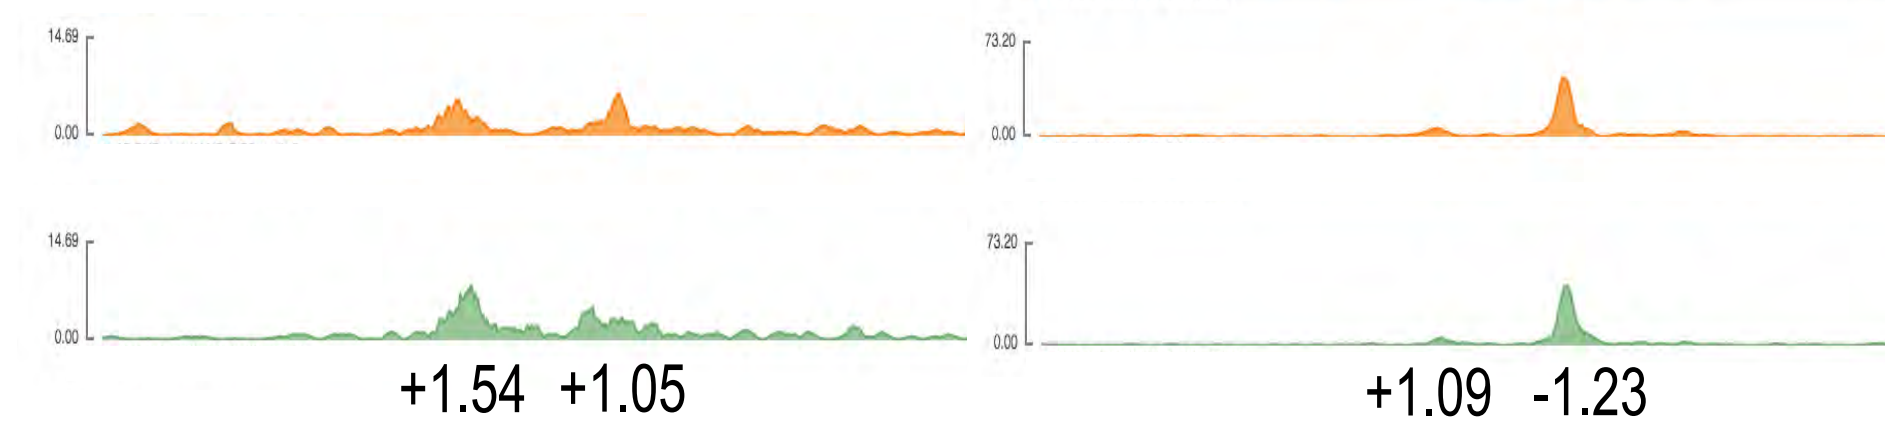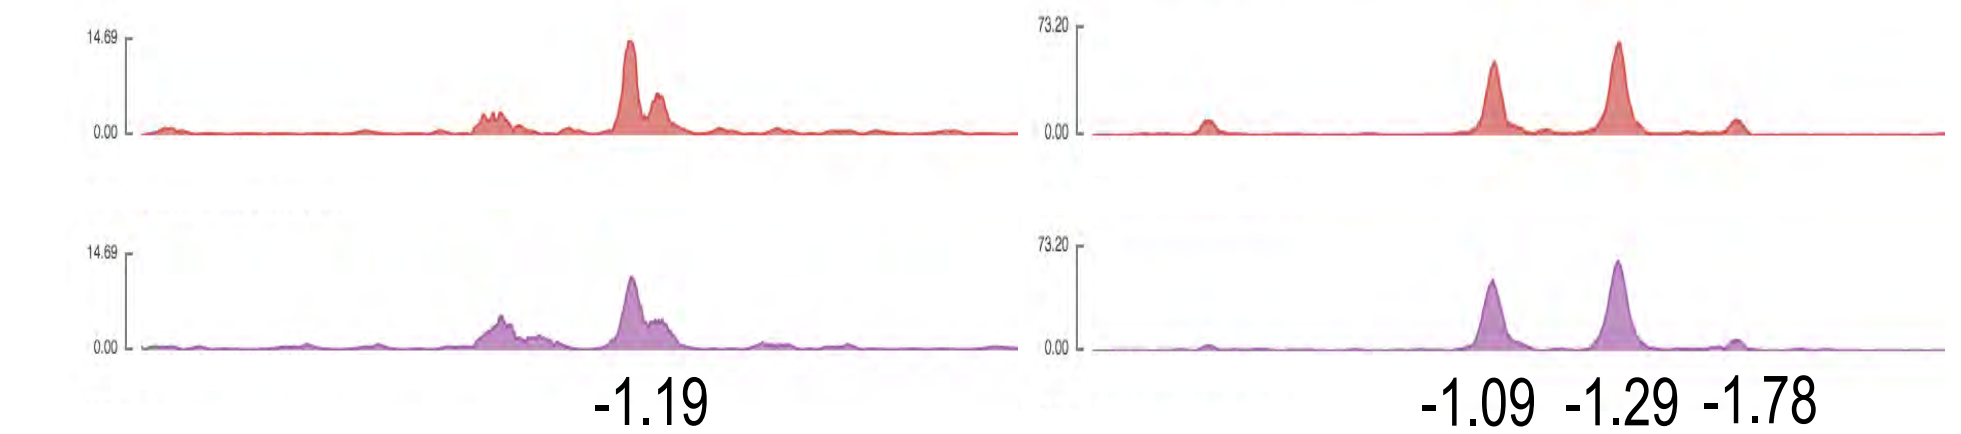

control LNCaP  
**H3K27ac**

MED19 LNCaP

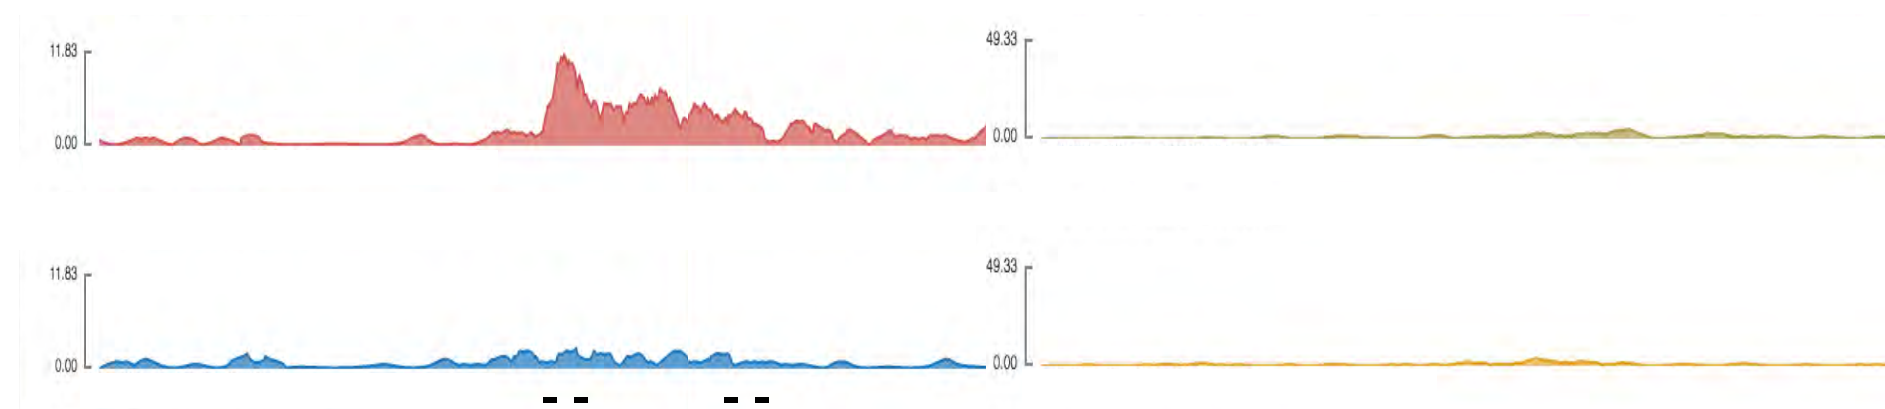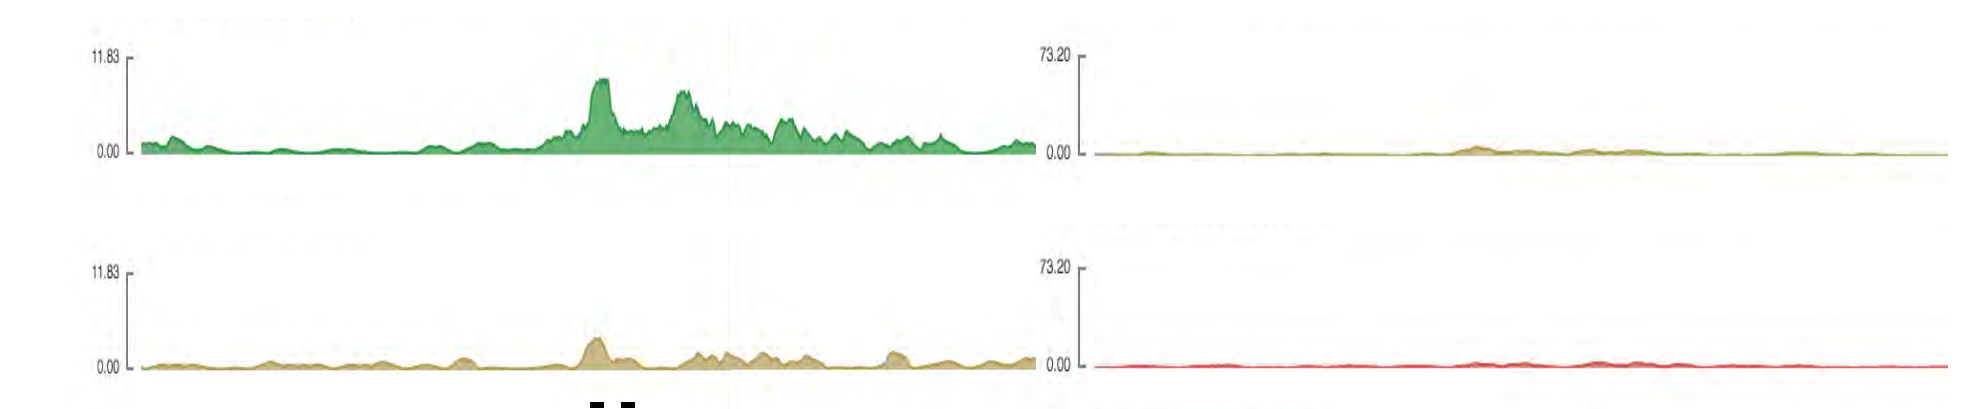

Supplement: pgen.1008540.s012.pdf [file pgen.1008540.s012.pdf]
