# Supplementary material for: MED19 alters AR occupancy and gene expression in prostate cancer cells, driving MAOA expression and growth under low androgen
Source: PubMed Central journal article supplement (PMC7875385; doi:10.1371/journal.pgen.1008540), 2021-01-29
Supplement: pgen.1008540.s014.pdf [file pgen.1008540.s014.pdf]

# S14 Fig

A

## Androgen Deprivation

### Top 10 motifs associated with MED19 in MED19 LNCaP cells

| Motif | Match    | % peaks with motif (% background) | p-value |
|-------|----------|-----------------------------------|---------|
|       | FOXM1    | 43.29% (13.49%)                   | 1E-1241 |
|       | FOXA1    | 43.54% (14.01%)                   | 1E-1199 |
|       | FOX:Ebox | 35.08% (9.44%)                    | 1E-1144 |
|       | FOXA2    | 33.99% (9.15%)                    | 1E-1100 |
|       | FOXA3    | 21.35% (3.88%)                    | 1E-966  |
|       | FOXK1    | 32.13% (12.63%)                   | 1E-603  |
|       | FOXL2    | 29.98% (11.72%)                   | 1E-559  |
|       | FOXF1    | 31.62% (13.02%)                   | 1E-544  |
|       | FOXO3    | 25.90% (9.31%)                    | 1E-540  |
|       | HOXB13   | 30.52% (12.80%)                   | 1E-503  |

### Top 10 motifs associated with AR+MED19 in MED19 LNCaP cells

| Motif | Match    | % peaks with motif (% background) | p-value |
|-------|----------|-----------------------------------|---------|
|       | FOXM1    | 40.33% (13.35%)                   | 1E-1010 |
|       | FOXA1    | 40.76% (13.78%)                   | 1E-993  |
|       | FOX:Ebox | 32.26% (9.05%)                    | 1E-951  |
|       | FOXA2    | 31.34% (8.75%)                    | 1E-924  |
|       | FOXA3    | 19.06% (3.69%)                    | 1E-778  |
|       | FOXK1    | 30.29% (12.54%)                   | 1E-493  |
|       | FOXO3    | 24.30% (8.98%)                    | 1E-464  |
|       | FOXF1    | 30.09% (12.99%)                   | 1E-452  |
|       | FOXL2    | 28.00% (11.56%)                   | 1E-451  |
|       | HOXB13   | 29.04% (12.61%)                   | 1E-427  |

### Top 10 motifs associated with AR in MED19 LNCaP cells

| Motif | Match    | % peaks with motif (% background) | p-value  |
|-------|----------|-----------------------------------|----------|
|       | FOXM1    | 48.17% (16.53%)                   | 1E-11572 |
|       | FOXA1    | 48.74% (17.25%)                   | 1E-11246 |
|       | FOXA2    | 36.63% (11.04%)                   | 1E-9671  |
|       | FOX:Ebox | 36.01% (11.06%)                   | 1E-9245  |
|       | FOXA3    | 22.14% (4.82%)                    | 1E-7817  |
|       | FOXK1    | 36.20% (15.49%)                   | 1E-5519  |
|       | FOXF1    | 36.89% (16.43%)                   | 1E-5231  |
|       | FOXL2    | 34.24% (14.63%)                   | 1E-5155  |
|       | FOXO3    | 29.29% (11.46%)                   | 1E-5002  |
|       | FOXP1    | 19.70% (6.37%)                    | 1E-4272  |

### Top 10 motifs associated with AR in control LNCaP cells

| Motif | Match    | % peaks with motif (% background) | p-value  |
|-------|----------|-----------------------------------|----------|
|       | FOXM1    | 51.95% (17.80%)                   | 1E-13806 |
|       | FOXA1    | 52.59% (18.46%)                   | 1E-13582 |
|       | FOXA2    | 38.97% (11.88%)                   | 1E-11052 |
|       | FOX:Ebox | 38.13% (11.66%)                   | 1E-10708 |
|       | FOXA3    | 23.52% (5.01%)                    | 1E-9172  |
|       | FOXK1    | 38.55% (16.81%)                   | 1E-6191  |
|       | FOXF1    | 39.71% (17.86%)                   | 1E-6058  |
|       | FOXL2    | 36.74% (15.91%)                   | 1E-5898  |
|       | FOXO3    | 31.17% (12.41%)                   | 1E-5611  |
|       | FOXP1    | 20.79% (6.89%)                    | 1E-4704  |

B

## R1881 Treatment

### Top 10 motifs associated with MED19 in MED19 LNCaP cells

| Motif | Match    | % peaks with motif (% background) | p-value |
|-------|----------|-----------------------------------|---------|
|       | FOXM1    | 33.39% (9.94%)                    | 1E-1241 |
|       | FOXA1    | 33.58% (10.08%)                   | 1E-1199 |
|       | FOXA2    | 26.96% (6.94%)                    | 1E-1144 |
|       | FOX:Ebox | 28.15% (8.36%)                    | 1E-1100 |
|       | FOXA3    | 16.16% (2.83%)                    | 1E-966  |
|       | FOXK1    | 24.82% (9.61%)                    | 1E-603  |
|       | FOXL2    | 22.45% (8.28%)                    | 1E-559  |
|       | FOXO3    | 20.23% (6.97%)                    | 1E-544  |
|       | FOXF1    | 23.43% (8.98%)                    | 1E-540  |
|       | FOXP1    | 14.15% (3.98%)                    | 1E-503  |

### Top 10 motifs associated with AR+MED19 in MED19 LNCaP cells

| Motif | Match    | % peaks with motif (% background) | p-value |
|-------|----------|-----------------------------------|---------|
|       | FOXM1    | 40.21% (12.65%)                   | 1E-1256 |
|       | FOXA1    | 39.90% (12.54%)                   | 1E-1245 |
|       | FOXA2    | 31.56% (8.66%)                    | 1E-1111 |
|       | FOX:Ebox | 32.77% (9.72%)                    | 1E-1054 |
|       | FOXA3    | 18.40% (3.57%)                    | 1E-871  |
|       | FOXK1    | 29.61% (12.11%)                   | 1E-572  |
|       | FOXL2    | 27.44% (10.73%)                   | 1E-566  |
|       | FOXO3    | 24.14% (8.91%)                    | 1E-537  |
|       | FOXF1    | 28.58% (11.83%)                   | 1E-537  |
|       | FOXP1    | 16.54% (4.94%)                    | 1E-482  |

### Top 10 motifs associated with AR in MED19 LNCaP cells

| Motif | Match    | % peaks with motif (% background) | p-value  |
|-------|----------|-----------------------------------|----------|
|       | FOXM1    | 49.90% (17.77%)                   | 1E-17196 |
|       | FOXA1    | 54.78% (21.74%)                   | 1E-16623 |
|       | FOXA2    | 37.10% (12.13%)                   | 1E-13161 |
|       | FOX:Ebox | 36.65% (12.13%)                   | 1E-12620 |
|       | FOXA3    | 21.61% (5.14%)                    | 1E-10356 |
|       | ARE      | 11.30% (1.64%)                    | 1E-8151  |
|       | GRE      | 12.06% (1.96%)                    | 1E-7944  |
|       | FOXK1    | 37.27% (16.98%)                   | 1E-7551  |
|       | FOXL2    | 34.99% (15.61%)                   | 1E-7265  |
|       | FOXF1    | 37.66% (17.62%)                   | 1E-7238  |

### Top 10 motifs associated with AR in control LNCaP cells

| Motif | Match    | % peaks with motif (% background) | p-value  |
|-------|----------|-----------------------------------|----------|
|       | FOXM1    | 51.99% (18.22%)                   | 1E-18076 |
|       | FOXA1    | 56.90% (22.30%)                   | 1E-17426 |
|       | FOXA2    | 38.34% (12.41%)                   | 1E-17287 |
|       | FOX:Ebox | 37.92% (12.55%)                   | 1E-13500 |
|       | FOXA3    | 22.39% (5.24%)                    | 1E-12900 |
|       | FOXK1    | 38.41% (17.26%)                   | 1E-10640 |
|       | FOXF1    | 38.98% (17.90%)                   | 1E-7835  |
|       | FOXL2    | 36.13% (16.02%)                   | 1E-7643  |
|       | ARE      | 10.70% (1.58%)                    | 1E-7435  |
|       | GRE      | 11.53% (1.94%)                    | 1E-7354  |
