# Supplementary material for: MED19 alters AR occupancy and gene expression in prostate cancer cells, driving MAOA expression and growth under low androgen
Source: PubMed Central journal article supplement (PMC7875385; doi:10.1371/journal.pgen.1008540), 2021-01-29
Supplement: pgen.1008540.s015.pdf [file pgen.1008540.s015.pdf]

# S15 Fig

A

## R1881 Treatment

Top 10 motifs associated with MED19+AR only in MED19 LNCaP cells

| Motif | Match | % peaks with motif (% background) | p-value |
|-------|-------|-----------------------------------|---------|
|       | SP1   | 33.59% (16.49%)                   | 1E-14   |
|       | SP5   | 51.90% (32.58%)                   | 1E-14   |
|       | CTCF  | 8.16% (1.62%)                     | 1E-12   |
|       | ETS   | 15.84% (6.34%)                    | 1E-11   |
|       | KLF3  | 29.22% (15.98%)                   | 1E-11   |
|       | ELF1  | 22.11% (10.91%)                   | 1E-9    |
|       | KLF6  | 44.31% (29.37%)                   | 1E-9    |
|       | KLF5  | 50.76% (35.50%)                   | 1E-9    |
|       | KLF9  | 22.96% (11.89%)                   | 1E-8    |
|       | ELK1  | 23.34% (12.21%)                   | 1E-8    |

B

## Androgen Deprivation

RNA-seq

Genes Upregulated with MED19 OE

Enrichr TF Perturbation Analysis

| Gene        | ELK1 KD     | AR KD       | MED19 OE  |
|-------------|-------------|-------------|-----------|
| SYT4        | down        | down        | up        |
| PLA2G2A     | down        | down        | up        |
| ATP1B1      | down        | down        | up        |
| NIPSNAP3A   | down        | down        | up        |
| <b>MAOA</b> | <b>down</b> | <b>down</b> | <b>up</b> |
| SLC44A1     | down        | down        | up        |
| BHCE        | down        | down        | up        |
| ADAM2       | down        | down        | up        |
| SQOR        | down        |             | up        |
| TMSB4X      | down        |             | up        |
| CAMK2N1     | down        |             | up        |
| GALNT3      | down        |             | up        |
| PKIB        |             | down        | up        |
| MANEA       |             | down        | up        |
| KCNN2       |             | down        | up        |

C

## R1881 Treatment

RNA-seq

Genes Upregulated with MED19 OE

Enrichr TF Perturbation Analysis

| Perturbation  | p-value  |
|---------------|----------|
| SRF knockdown | 6.15E-10 |

| Gene    | SRF KD | MED19 OE |
|---------|--------|----------|
| ABCA12  | down   | up       |
| RAB27A  | down   | up       |
| GLYATL2 | down   | up       |
| RBM24   | down   | up       |
| SYT4    | down   | up       |
| TMEM140 | down   | up       |
| GNAI1   | down   | up       |
| ZNF385B | down   | up       |
| GPR158  | down   | up       |
| SEMA3C  | down   | up       |
| SSFA2   | down   | up       |
| DDIT4L  | down   | up       |
| DPP4    | down   | up       |
