# Supplementary material for: MED19 alters AR occupancy and gene expression in prostate cancer cells, driving MAOA expression and growth under low androgen
Source: PubMed Central journal article supplement (PMC7875385; doi:10.1371/journal.pgen.1008540), 2021-01-29
Supplement: pgen.1008540.s016.pdf [file pgen.1008540.s016.pdf]

# S16 Fig

A

## control LNCaP Vehicle vs R1881 Treatment

### Top 10 motifs associated with AR with vehicle and R1881 treatment

| Motif | Match    | % peaks with motif (% background) | p-value  |
|-------|----------|-----------------------------------|----------|
|       | FOXM1    | 55.03% (18.33%)                   | 1E-11895 |
|       | FOXA1    | 60.08% (22.52%)                   | 1E-11481 |
|       | FOXA2    | 41.36% (12.22%)                   | 1E-9459  |
|       | FOX:Ebox | 40.67% (12.17%)                   | 1E-9118  |
|       | FOXA3    | 24.96% (5.23%)                    | 1E-7601  |
|       | FOXK1    | 40.52% (16.96%)                   | 1E-5459  |
|       | FOXF1    | 41.39% (18.05%)                   | 1E-5200  |
|       | FOXL2    | 38.49% (16.27%)                   | 1E-5010  |
|       | FOXO3    | 32.87% (12.50%)                   | 1E-4941  |
|       | FOXP1    | 22.10% (6.96%)                    | 1E-4141  |

### Additional AR-related motifs

| Motif | Match       | % peaks with motif (% background) | p-value |
|-------|-------------|-----------------------------------|---------|
|       | FOXA1:AR    | 7.19% (1.55%)                     | 1E-1966 |
|       | AR-halfsite | 44.02% (32.67%)                   | 1E-988  |
|       | ARE         | 5.14% (1.57%)                     | 1E-917  |

### Top 10 motifs associated with AR with R1881 treatment only

| Motif | Match    | % peaks with motif (% background) | p-value |
|-------|----------|-----------------------------------|---------|
|       | GRE      | 19.25% (2.08%)                    | 1E-7453 |
|       | ARE      | 18.01% (1.74%)                    | 1E-7445 |
|       | FOXM1    | 48.28% (18.18%)                   | 1E-6399 |
|       | PR       | 54.09% (22.52%)                   | 1E-6381 |
|       | PGR      | 20.00% (3.01%)                    | 1E-6144 |
|       | FOXA1    | 53.07% (22.23%)                   | 1E-6137 |
|       | FOXA1:AR | 13.52% (1.54%)                    | 1E-4958 |
|       | FOXA2    | 34.66% (12.85%)                   | 1E-4255 |
|       | FOX:Ebox | 34.48% (12.99%)                   | 1E-4114 |
|       | FOXA3    | 19.27% (5.46%)                    | 1E-3155 |

### Additional AR-related motifs

| Motif | Match       | % peaks with motif (% background) | p-value |
|-------|-------------|-----------------------------------|---------|
|       | AR-halfsite | 54.60% (34.74%)                   | 1E-2244 |

### Top 10 motifs associated with AR with vehicle treatment only

| Motif | Match    | % peaks with motif (% background) | p-value |
|-------|----------|-----------------------------------|---------|
|       | FOXM1    | 37.62% (14.93%)                   | 1E-1686 |
|       | FOXA1    | 38.60% (15.79%)                   | 1E-1652 |
|       | FOXA2    | 28.03% (9.72%)                    | 1E-1463 |
|       | FOX:Ebox | 26.53% (9.62%)                    | 1E-1279 |
|       | FOXA3    | 16.38% (4.18%)                    | 1E-1201 |
|       | HOXB13   | 33.53% (15.25%)                   | 1E-1124 |
|       | FOXK1    | 29.44% (14.19%)                   | 1E-841  |
|       | FOXF1    | 31.25% (15.68%)                   | 1E-823  |
|       | FOXL2    | 28.51% (13.71%)                   | 1E-813  |
|       | FOXO3    | 23.59% (10.32%)                   | 1E-795  |

### Additional AR-related motifs

| Motif | Match       | % peaks with motif (% background) | p-value |
|-------|-------------|-----------------------------------|---------|
|       | AR-halfsite | 31.67% (29.45%)                   | 1E-14   |

B

## MED19 LNCaP Vehicle vs R1881 Treatment

### Top 10 motifs associated with AR with vehicle and R1881 treatment

| Motif | Match    | % peaks with motif (% background) | p-value  |
|-------|----------|-----------------------------------|----------|
|       | FOXM1    | 51.88% (17.76%)                   | 1E-10127 |
|       | FOXA1    | 52.47% (18.39%)                   | 1E-9955  |
|       | FOXA2    | 39.38% (11.92%)                   | 1E-8287  |
|       | FOX:Ebox | 38.72% (11.95%)                   | 1E-7917  |
|       | FOXA3    | 23.80% (5.04%)                    | 1E-6857  |
|       | FOXK1    | 38.74% (16.61%)                   | 1E-4730  |
|       | FOXF1    | 39.36% (17.23%)                   | 1E-4635  |
|       | FOXL2    | 36.56% (15.55%)                   | 1E-4452  |
|       | FOXO3    | 31.46% (12.07%)                   | 1E-4438  |
|       | FOXP1    | 21.19% (6.59%)                    | 1E-3853  |

### Additional AR-related motifs

| Motif | Match       | % peaks with motif (% background) | p-value |
|-------|-------------|-----------------------------------|---------|
|       | FOXA1:AR    | 6.36% (1.49%)                     | 1E-1531 |
|       | AR-halfsite | 44.58% (32.51%)                   | 1E-1073 |
|       | ARE         | 5.10% (1.54%)                     | 1E-889  |

### Top 10 motifs associated with AR with R1881 treatment only

| Motif | Match    | % peaks with motif (% background) | p-value |
|-------|----------|-----------------------------------|---------|
|       | ARE      | 18.16% (1.62%)                    | 1E-8795 |
|       | GRE      | 19.31% (2.00%)                    | 1E-8605 |
|       | PGR      | 20.07% (2.94%)                    | 1E-7042 |
|       | FOXM1    | 47.49% (17.82%)                   | 1E-7039 |
|       | PR       | 54.43% (23.20%)                   | 1E-6914 |
|       | FOXA1    | 52.30% (22.00%)                   | 1E-6674 |
|       | FOXA1:AR | 13.07% (1.64%)                    | 1E-5011 |
|       | FOXA2    | 34.35% (12.73%)                   | 1E-4712 |
|       | FOX:Ebox | 34.06% (13.10%)                   | 1E-4385 |
|       | FOXA3    | 19.11% (5.32%)                    | 1E-3577 |

### Additional AR-related motifs

| Motif | Match       | % peaks with motif (% background) | p-value |
|-------|-------------|-----------------------------------|---------|
|       | AR-halfsite | 54.85% (32.51%)                   | 1E-2517 |

### Top 10 motifs associated with AR with vehicle treatment only

| Motif | Match    | % peaks with motif (% background) | p-value |
|-------|----------|-----------------------------------|---------|
|       | FOXM1    | 29.30% (11.86%)                   | 1E-992  |
|       | FOXA1    | 29.83% (12.31%)                   | 1E-979  |
|       | FOXA2    | 22.25% (8.06%)                    | 1E-870  |
|       | FOX:Ebox | 21.49% (8.16%)                    | 1E-774  |
|       | FOXA3    | 12.81% (3.38%)                    | 1E-739  |
|       | HOXB13   | 27.10% (12.78%)                   | 1E-664  |
|       | FOXK1    | 23.54% (11.50%)                   | 1E-517  |
|       | FOXO3    | 18.85% (8.37%)                    | 1E-497  |
|       | NF1      | 10.32% (3.14%)                    | 1E-489  |
|       | FOXF1    | 24.10% (12.24%)                   | 1E-484  |

### Additional AR-related motifs

| Motif | Match       | % peaks with motif (% background) | p-value |
|-------|-------------|-----------------------------------|---------|
|       | AR-halfsite | 31.58% (30.58%)                   | 1E-3    |

C

## MED19 LNCaP Vehicle vs R1881 Treatment

### Top 10 motifs associated with MED19 with vehicle and R1881 treatment

| Motif | Match    | % peaks with motif (% background) | p-value |
|-------|----------|-----------------------------------|---------|
|       | FOXA1    | 37.26% (10.72%)                   | 1E-680  |
|       | FOXM1    | 36.74% (10.47%)                   | 1E-676  |
|       | FOX:Ebox | 31.78% (8.25%)                    | 1E-634  |
|       | FOXA2    | 29.96% (7.31%)                    | 1E-634  |
|       | FOXA3    | 18.61% (3.07%)                    | 1E-542  |
|       | FOXK1    | 28.10% (10.06%)                   | 1E-358  |
|       | FOXO3    | 22.59% (7.26%)                    | 1E-327  |
|       | FOXL2    | 25.27% (9.03%)                    | 1E-317  |
|       | FOXF1    | 26.05% (9.88%)                    | 1E-298  |
|       | FOXK2    | 18.05% (5.49%)                    | 1E-275  |

### Additional AR-related motifs

| Motif | Match       | % peaks with motif (% background) | p-value |
|-------|-------------|-----------------------------------|---------|
|       | FOXA1:AR    | 2.99% (0.90%)                     | 1E-44   |
|       | AR-halfsite | 39.84% (39.84%)                   | 1E-24   |
|       | ARE         | 3.16% (1.53%)                     | 1E-19   |

### Top 10 motifs associated with MED19 with R1881 treatment only

| Motif | Match    | % peaks with motif (% background) | p-value |
|-------|----------|-----------------------------------|---------|
|       | FOXM1    | 31.58% (9.31%)                    | 1E-850  |
|       | FOXA1    | 31.03% (9.14%)                    | 1E-834  |
|       | FOXA2    | 25.22% (6.80%)                    | 1E-732  |
|       | FOX:Ebox | 25.93% (7.92%)                    | 1E-644  |
|       | FOXA3    | 14.71% (2.81%)                    | 1E-582  |
|       | GRE      | 11.00% (1.63%)                    | 1E-532  |
|       | PGR      | 10.65% (1.59%)                    | 1E-512  |
|       | ARE      | 10.44% (1.59%)                    | 1E-494  |
|       | FOXA1:AR | 7.43% (0.77%)                     | 1E-461  |
|       | PR       | 34.49% (17.27%)                   | 1E-378  |

### Additional AR-related motifs

| Motif | Match       | % peaks with motif (% background) | p-value |
|-------|-------------|-----------------------------------|---------|
|       | AR-halfsite | 44.94% (33.78%)                   | 1E-118  |

### Top 10 motifs associated with MED19 with vehicle treatment only

| Motif | Match    | % peaks with motif (% background) | p-value |
|-------|----------|-----------------------------------|---------|
|       | FOXM1    | 53.18% (17.31%)                   | 1E-609  |
|       | FOXA1    | 53.20% (18.35%)                   | 1E-564  |
|       | FOX:Ebox | 40.16% (10.76%)                   | 1E-533  |
|       | FOXA2    | 39.90% (11.47%)                   | 1E-487  |
|       | FOXA3    | 25.34% (4.86%)                    | 1E-438  |
|       | HOXB13   | 40.23% (16.87%)                   | 1E-281  |
|       | FOXK1    | 38.38% (16.49%)                   | 1E-253  |
|       | FOXF1    | 40.35% (17.97%)                   | 1E-252  |
|       | FOXL2    | 36.87% (15.82%)                   | 1E-241  |
|       | FOXO3    | 31.10% (12.10%)                   | 1E-232  |

### Additional AR-related motifs

| Motif | Match    | % peaks with motif (% background) | p-value |
|-------|----------|-----------------------------------|---------|
|       | FOXA1:AR | 2.06% (1.38%)                     | 1E-3    |
