# Supplementary material for: MED19 alters AR occupancy and gene expression in prostate cancer cells, driving MAOA expression and growth under low androgen
Source: PubMed Central journal article supplement (PMC7875385; doi:10.1371/journal.pgen.1008540), 2021-01-29

**S17 Fig**

**A**

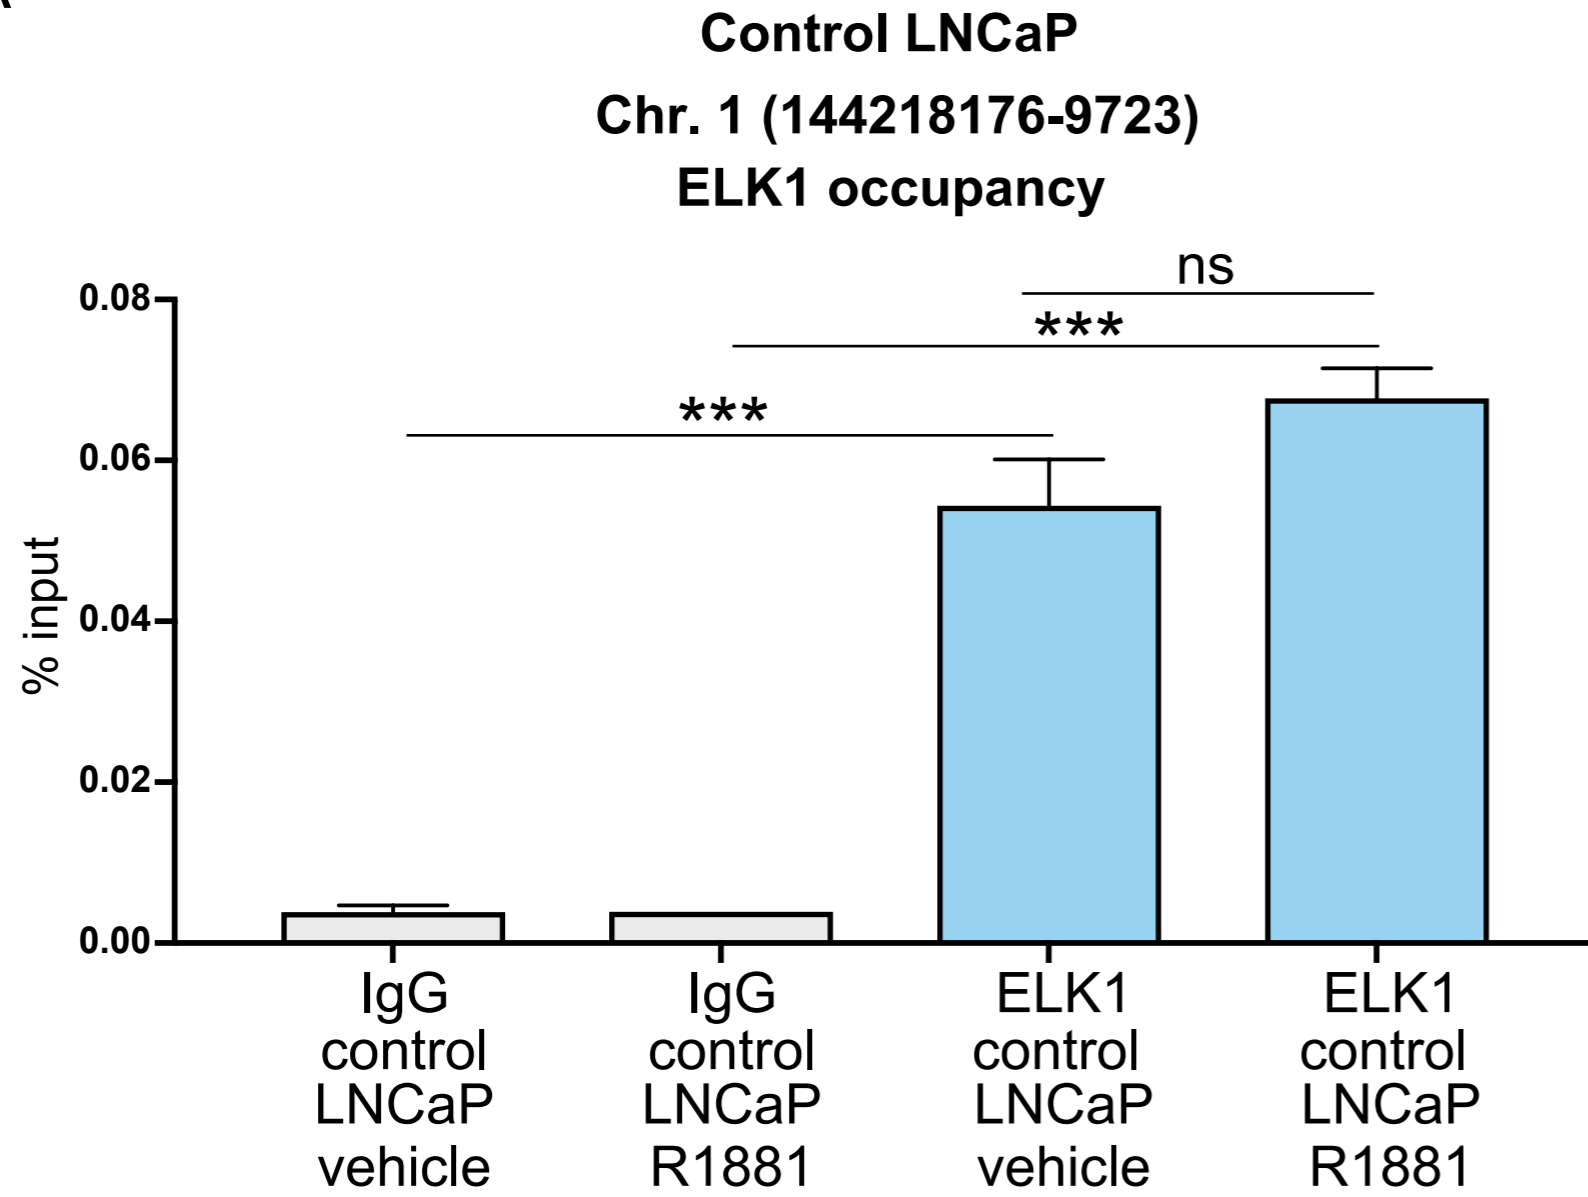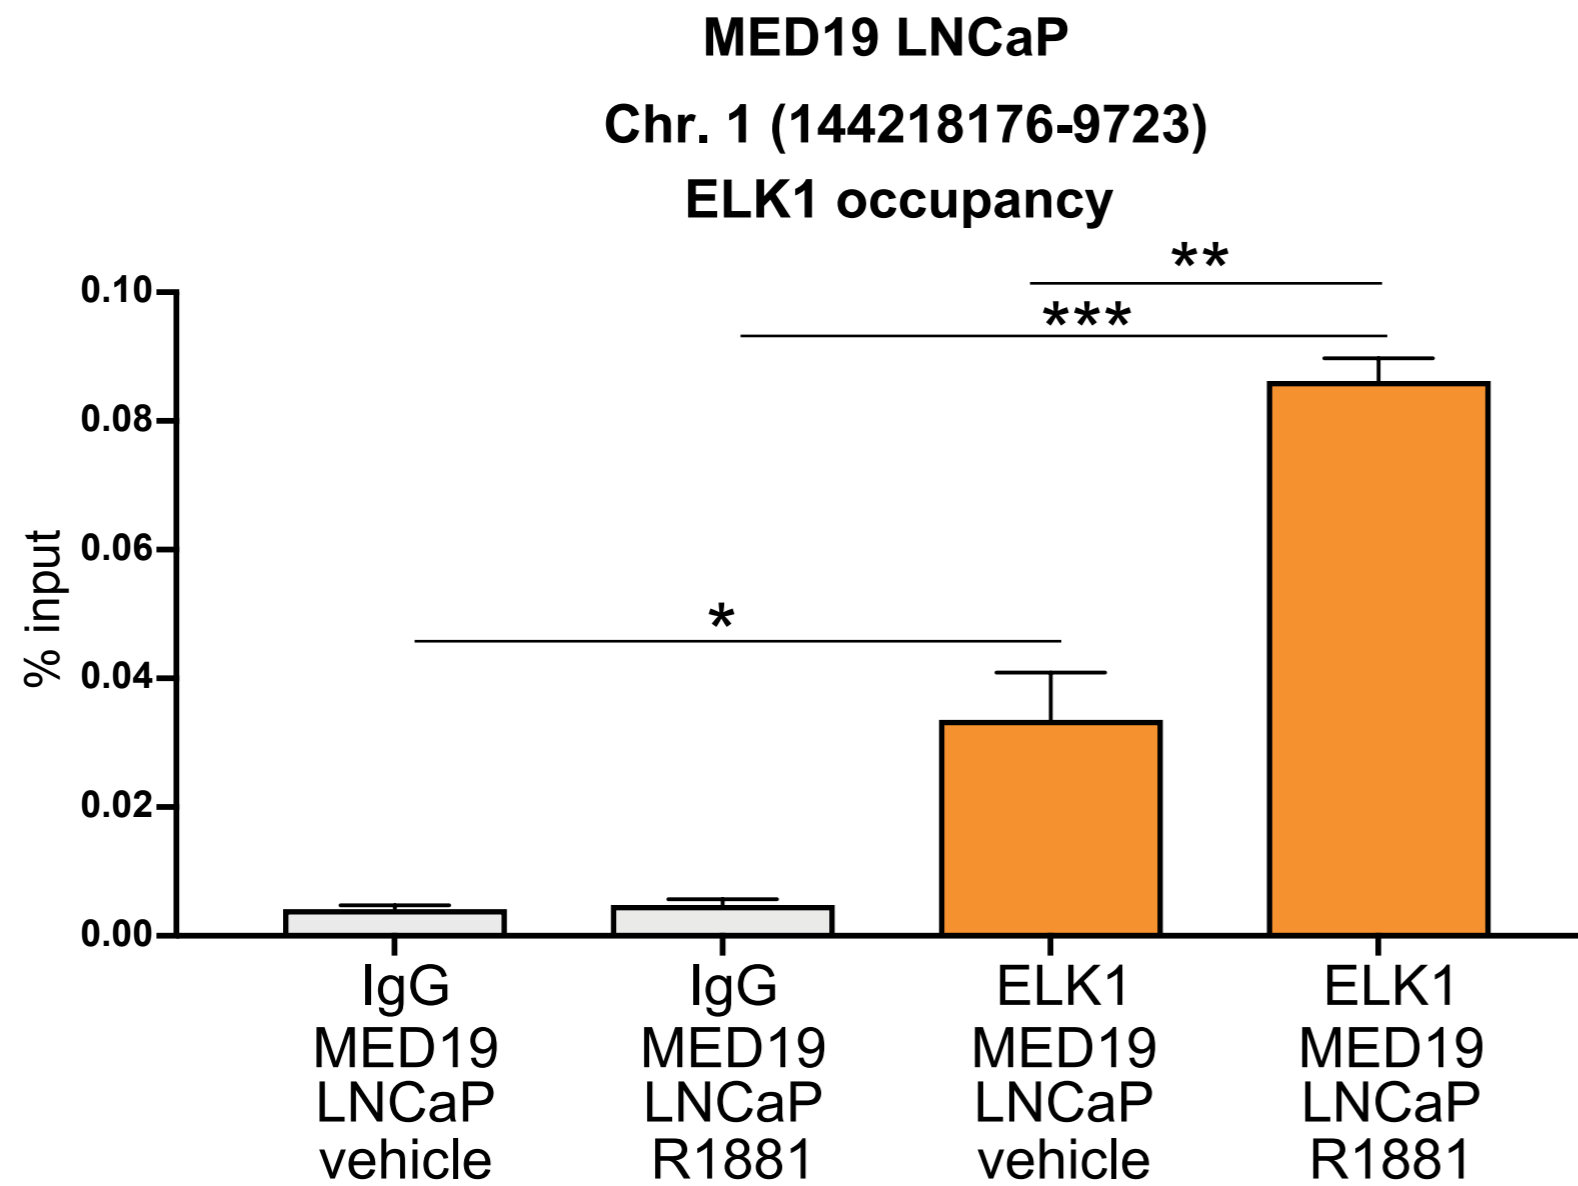

**B**

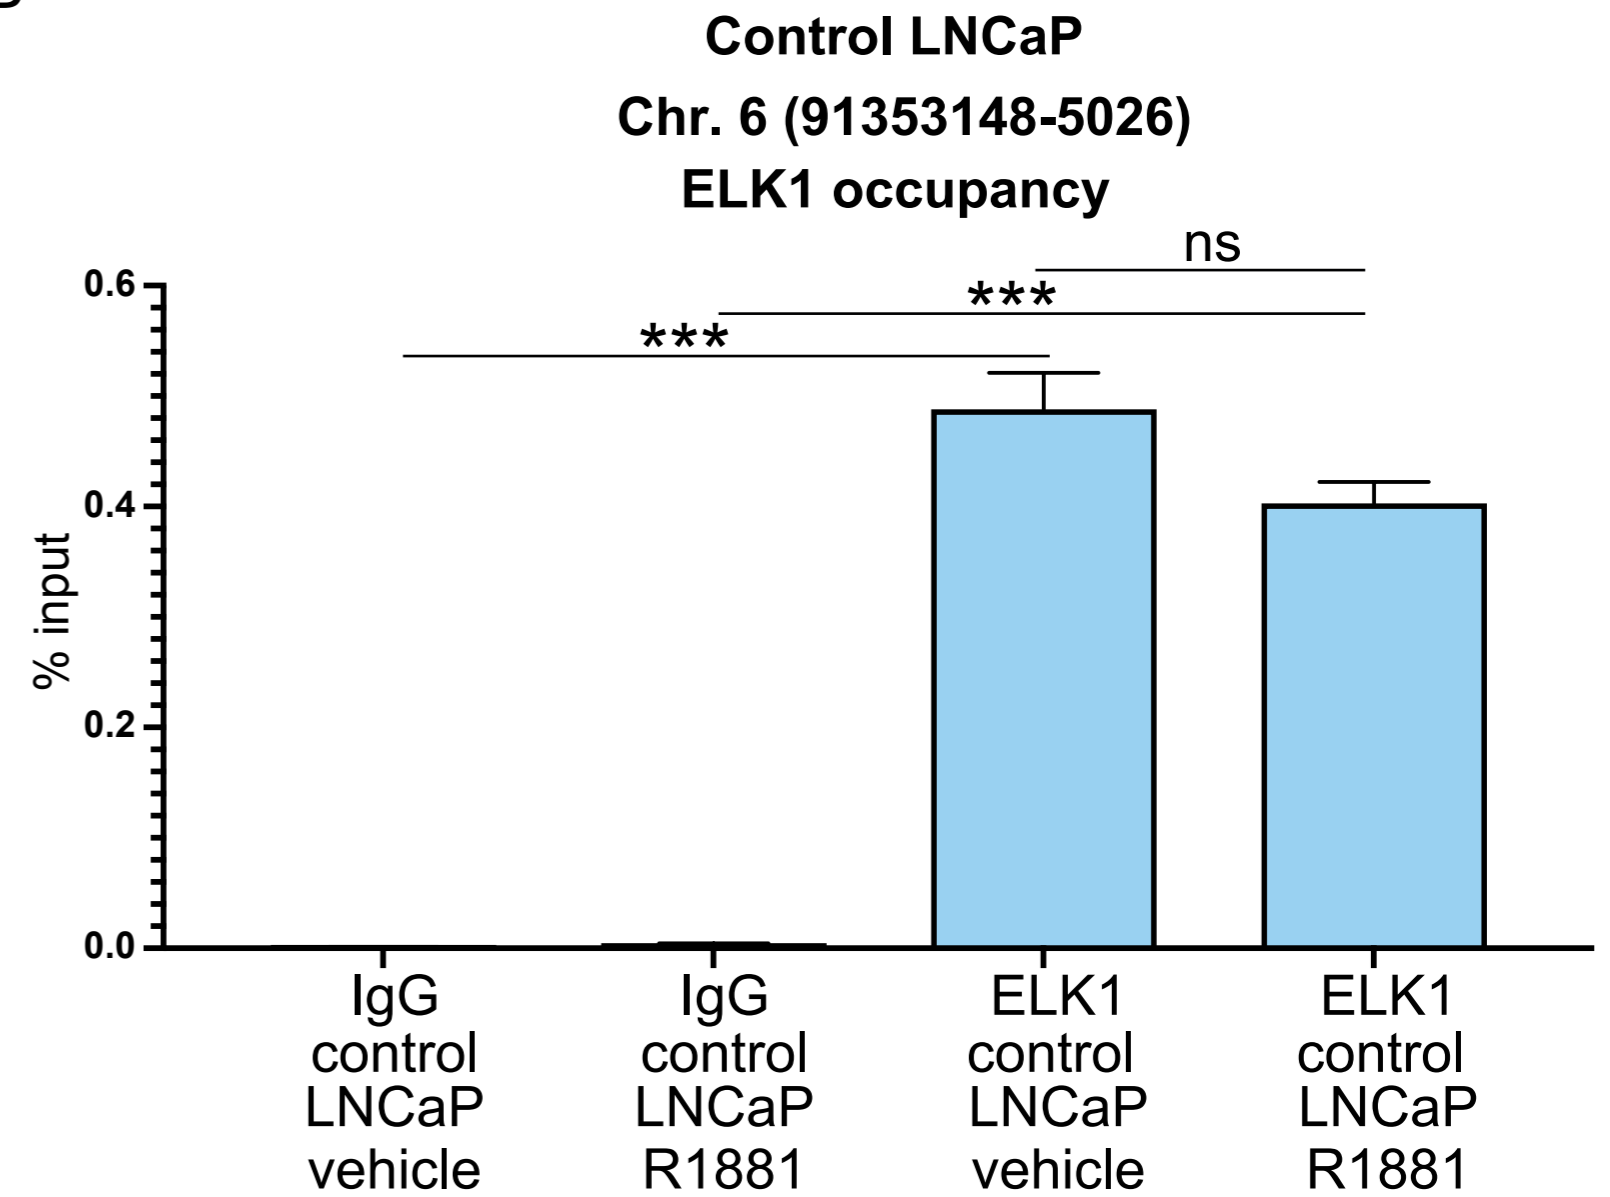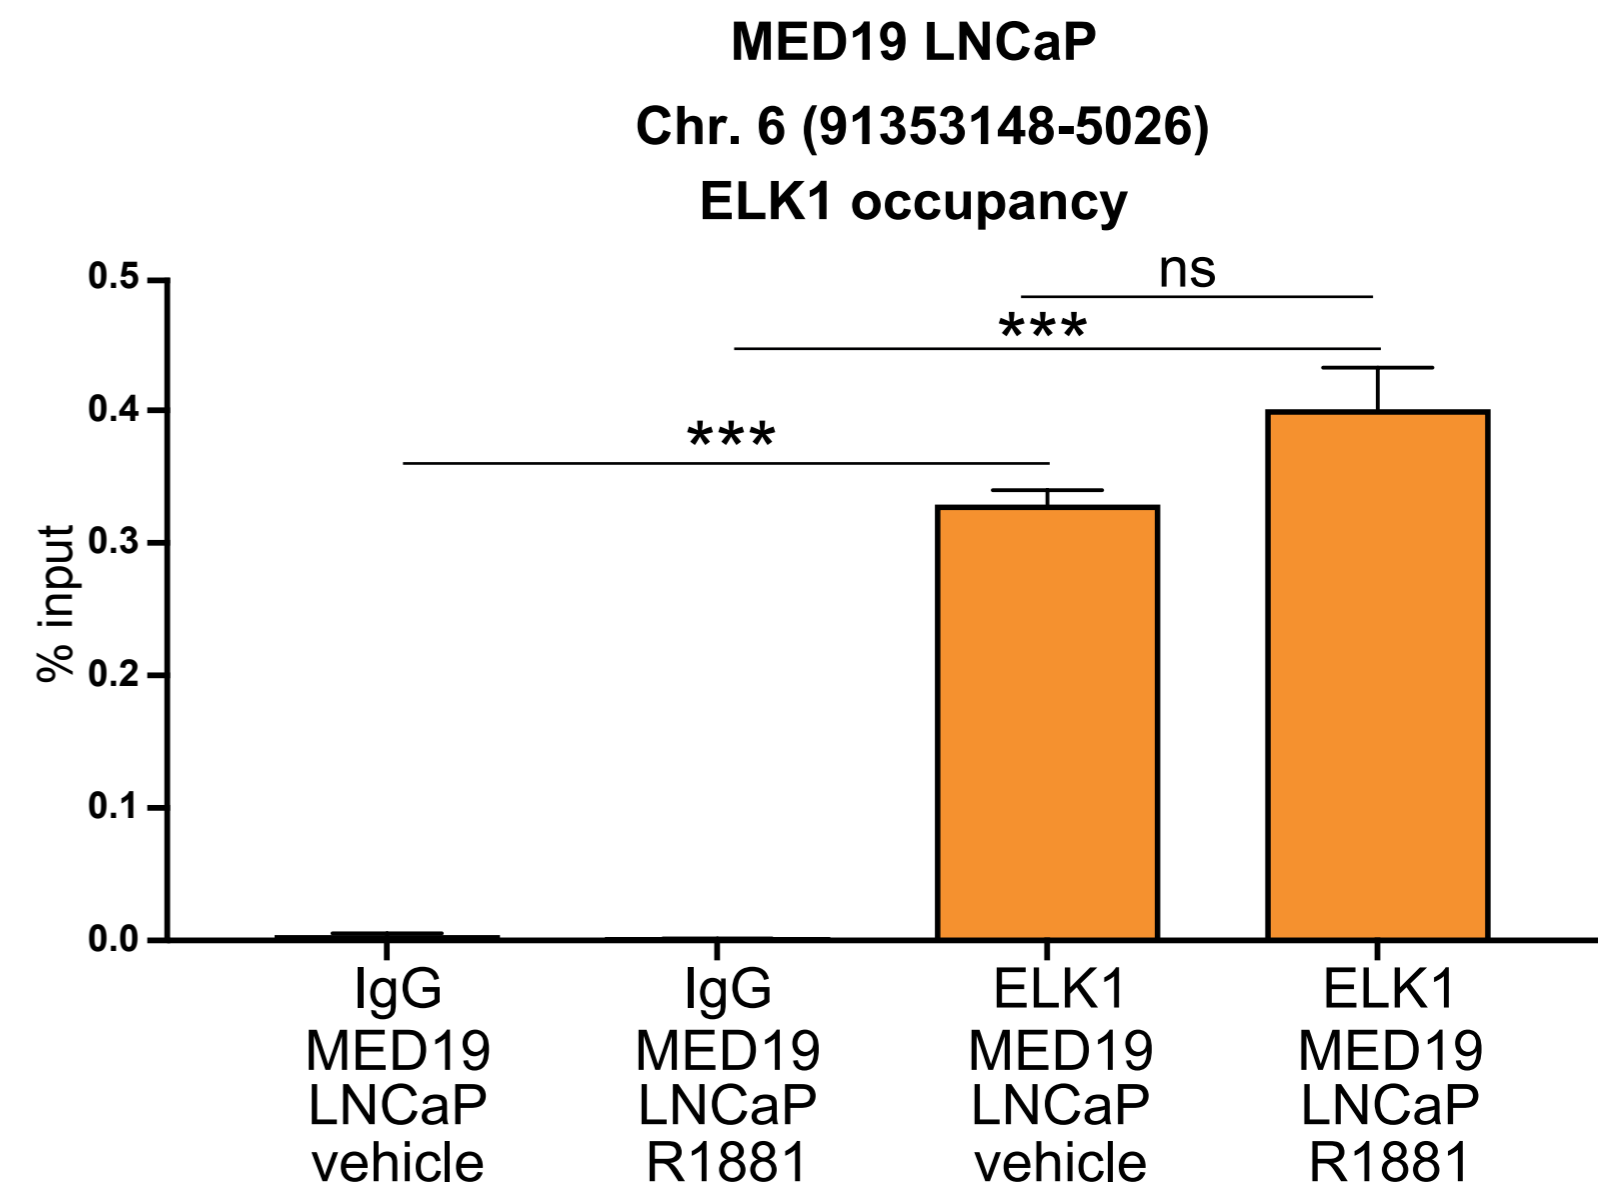

Supplement: pgen.1008540.s017.pdf [file pgen.1008540.s017.pdf]
