# Supplementary material for: MED19 alters AR occupancy and gene expression in prostate cancer cells, driving MAOA expression and growth under low androgen
Source: PLoS Genet. 2021 Jan 29;17(1):e1008540. doi: 10.1371/journal.pgen.1008540 (PMC7875385; doi:10.1371/journal.pgen.1008540)
Supplement: S5 Table — Top 100 androgen-induced (sheet 1) and androgen-repressed (sheet 2) genes for control LNCaP cells and MED19 LNCaP cells, with fold changes for each shown in comparison. Genes with 1.5-fold or more change in mRNA expression in response to androgen only in control LNCaP cells (sheet 3) or only in MED19 LNCaP cells (sheet 4). (XLSX) [file pgen.1008540.s025.xlsx]

## Sheet: upregulated genes
Top 100 androgen-induced genes for control LNCaP cells and for MED19 LNCaP cells - related to heatmaps in Figure 5A and 5B
	Response to R1881 (fold change expression R1881 vs vehicle)
Gene Name	control LNCaP	MED19 LNCaP	fold change in response to R1881
STEAP4	656.045	519.482	-1.26288			≥1.5 fold decreased response to R1881 in MED19 LNCaP cells compared to control LNCaP cells
CCDC141	582.882	255.936	-2.27745			≥1.5 fold increased response to R1881 in MED19 LNCaP cells compared to control LNCaP cells
TUBA3D	269.264	245.83	-1.09533			significant response to R1881 only in control LNCaP cells
SLC38A4	234.96	120.156	-1.95546			significant response to R1881 only in MED19 LNCaP cells
SLC2A3	150.12	188.932	1.25854
KLK2	138.935	72.1601	-1.92537
TTN	137.664	125.288	-1.09878
NPPC	136.69	69.1008	-1.97812
CTNNA2	114.582	67.1172	-1.70719
SNAI2	100.734	82.9356	-1.21461
CHRNA2	80.2289	428.93	5.34633
ORM1	77.0648	138.725	1.80011
ORM2	73.9322	77.9059	1.05375
F5	73.238	39.0933	-1.87342
PDE3A	69.5086	26.0982	-2.66335
DOCK8	61.4759	38.9694	-1.57754
SLC26A3	58.4601	56.5224	-1.03428
TUBA3E	57.684	37.5167	-1.53756
TARP	56.5945	16.9543	-3.33806
HPGD	53.0879	78.513	1.47892
KRT73	52.1621	42.9903	-1.21335
TRPM8	51.2951	54.5633	1.06371
KLK3	48.8555	18.5174	-2.63836
TMEM100	45.3563	58.5822	1.2916
SPOCK1	42.2963	19.7277	-2.14401
CSGALNACT1	39.0245	39.4469	1.01082
TG	37.0425	33.2502	-1.11405
PLA2G4E	34.0889	64.3033	1.88634
LAT2	33.2871	23.0218	-1.44589
TBX15	32.7988	78.8823	2.40504
TMCC3	32.1251	69.1343	2.15203
MAK	31.318	42.7316	1.36444
PTCRA	30.6361	42.4073	1.38423
ST6GALNAC1	30.4462	53.8943	1.77015
NDRG1	29.4856	34.3698	1.16565
FKBP5	26.4352	25.6501	-1.03061
SDK1	25.8627	26.6143	1.02906
ADH1C	24.9775	13.6278	-1.83283
ZNF812	24.5267	22.8474	-1.0735
CYP11A1	24.3331	12.9772	-1.87507
TMPRSS2	23.3484	19.9144	-1.17244
NNT	23.2402	32.4343	1.39561
MOGAT2	22.451	34.8045	1.55024
FAM105A	21.4487	31.0072	1.44564
ALPK2	21.1133	16.3868	-1.28843
EAF2	21.1069	27.8346	1.31874
AKAP12	20.3289	17.1571	-1.18487
PKP1	19.9833	29.1699	1.45971
CUX2	19.9101	13.0031	-1.53118
DUOX1	19.6142	40.0342	2.04108
NCAPD3	19.3689	16.5203	-1.17243
PTGER4	19.1086	30.3016	1.58576
CACNG4	18.5664	33.5625	1.8077
IRS2	18.3994	12.727	-1.4457
MICAL1	17.863	22.9498	1.28477
ANGPT2	17.225	22.2065	1.2892
MYBPC1	17.1092	11.5198	-1.4852
CXCR4	16.9604	11.2929	-1.50186
SP9	16.9514	11.5126	-1.47242
SGK223	16.894	21.945	1.29898
HS3ST4	16.6224	10.0107	-1.66046
SLC45A3	16.4839	16.5911	1.0065
MAF	16.4414	20.7316	1.26094
SLC15A2	16.3901	28.7991	1.7571
LINC00844	16.2867	25.4831	1.56466
GNMT	16.0489	19.6882	1.22676
LOX	16.0107	5.73177	-2.79333
SLC16A6	15.8582	31.9123	2.01235
NNMT	15.6073	14.9914	-1.04108
KL	15.6053	9.58714	-1.62773
ELOVL2	15.295	24.3089	1.58934
CENPN	14.8599	13.2715	-1.11969
PLA2G5	14.7266	4.42703	-3.32652
BHLHA15	14.6155	13.8773	-1.05319
REP15	14.4416	5.35965	-2.6945
TNFAIP3	14.3339	12.3768	-1.15813
THSD7A	14.0103	4.37132	-3.20505
EMP1	13.4546	8.81432	-1.52645
LAMA1	12.4712	7.80311	-1.59823
RFX6	12.1427	22.817	1.87907
KLK4	12.0401	12.3791	1.02816
ERRFI1	11.7159	8.82093	-1.32819
ELOVL7	11.6813	9.55629	-1.22237
FAM189A2	11.5134	6.09008	-1.89052
FOXD4	11.4887	9.9042	-1.15998
WWTR1	11.2169	22.2495	1.98357
PHLDB2	11.18	12.6881	1.13489
CTBP1-AS	11.0019	10.2956	-1.0686
AFF3	10.9982	14.1397	1.28564
IGF1R	10.8419	11.1761	1.03082
FAM107A	10.6706	4.81882	-2.21436
WNT7B	10.4435	10.8082	1.03492
ATP1A2	10.4424	11.1392	1.06673
CADPS2	10.4192	14.6469	1.40576
RHOU	10.3018	8.9476	-1.15135
NKX3-1	10.164	10.5319	1.0362
LIFR	9.92447	11.1399	1.12247
AZGP1P1	9.85824	26.4156	2.67955
SLC35F1	9.84063	3.57308	-2.7541
LOC101927482	9.69137	14.1672	1.46184
CECR6	9.5443	15.5219	1.6263
WIPI1	9.48949	17.4283	1.83659
PRODH	9.15741	18.9455	2.06887
RCSD1	8.81396	16.9169	1.91933
PLP1	8.73223	16.9466	1.9407
PGLYRP2	8.6896	15.9295	1.83317
WISP1	8.5724	24.1276	2.81457
AZGP1	8.39378	14.3032	1.70402
MAML2	8.08798	12.6763	1.5673
RMST	7.80863	18.4317	2.36043
HSD17B2	7.73215	16.8644	2.18108
SOX9	7.65716	13.5966	1.77567
SH3D21	7.50036	13.9086	1.85439
ANKRD37	7.16914	13.8502	1.93192
RGS4	7.11967	13.4322	1.88663
CCDC160	7.10163	20.0151	2.81838
RUNX1	6.99998	26.1985	3.74265
TGM2	5.47675	22.5566	4.11861
TRIM53AP	5.29929	13.3848	2.52577
KRT72	4.81548	32.0971	6.6654
CASC10	4.63664	15.7428	3.3953
SLC6A3	4.49422	17.9095	3.98501
SLC2A5	4.13719	12.6975	3.06911
TGFB2		12.5966

## Sheet: downregulated genes
Top 100 androgen-repressed genes for control LNCaP cells and for MED19 LNCaP cells - related to heatmaps in Figure 5A and 5B
	Response to R1881 (fold change expression R1881 vs vehicle)
Gene Name	control LNCaP	MED19 LNCaP	fold change in response to R1881
LOC101928961		-8.40181				≥1.5 fold decreased response to R1881 in MED19 LNCaP cells compared to control LNCaP cells
VWC2L		-9.89857				≥1.5 fold increased response to R1881 in MED19 LNCaP cells compared to control LNCaP cells
OR51E1		-10.9533				significant response to R1881 only in control LNCaP cells
DOCK10		-15.3607				significant response to R1881 only in MED19 LNCaP cells
IL1B	-2.78937	-13.2257	4.74146
UNC13C	-2.81724	-11.9064	4.22626
KCNJ13	-3.10114	-7.37544	2.3783
TSHZ3	-3.3308	-7.79176	2.33931
MAPRE2	-3.38173	-8.75678	2.58944
FAM198A	-3.4104	-8.11033	2.37812
SALL4	-3.4263	-11.9298	3.48183
CD200	-3.5062	-9.15322	2.61058
RGS17	-3.57036	-8.08625	2.26483
SLITRK3	-3.68055	-8.60944	2.33917
ARHGAP20	-3.69289	-11.283	3.05533
TNFSF15	-3.85313	-8.62575	2.23863
SERPINI1	-4.00752	-7.49527	1.8703
PGM2L1	-4.0262	-8.09673	2.01101
DSG4	-4.2274	-23.0119	5.44351
LOC286367	-4.24681	-12.9538	3.05024
BMX	-4.40964	-8.22702	1.86569
HOXA11-AS	-4.42179	-9.79218	2.21453
LRRTM3	-4.48202	-15.4292	3.44247
GIMAP6	-4.53069	-11.538	2.54663
GRIK1	-4.55989	-12.0926	2.65195
COLEC12	-4.80418	-8.62695	1.79572
LHX9	-4.80698	-20.845	4.3364
GRAMD1C	-4.82163	-7.53663	1.56309
NIPSNAP3B	-4.91472	-9.5596	1.9451
UGT2A3	-4.93541	-7.53303	1.52632
PLA2G2F	-5.0891	-19.0429	3.7419
CDH26	-5.31957	-7.57045	1.42313
APOL4	-5.5599	-9.4429	1.69839
PKIB	-5.59792	-9.91897	1.7719
BCHE	-5.65129	-8.82747	1.56203
BDNF	-5.66835
ADAM2	-5.67409	-12.2033	2.15071
ANKRD62	-5.67504	-4.0919	-1.3869
FLJ31104	-5.6798	-7.20915	1.26926
MIMT1	-5.7121	-3.70723	-1.5408
MFSD4	-5.71546	-6.08265	1.06425
FAM184B	-5.77079	-6.43607	1.11528
LINC01351	-5.84523	-5.54712	-1.05374
SBF2-AS1	-5.86886
IL36RN	-5.94868	-6.14899	1.03367
GCG	-5.95376	-3.44432	-1.72857
KRT80	-6.14047	-3.05584	-2.00942
ADRA1A	-6.29781	-6.44339	1.02312
GUSBP1	-6.42043	-6.60231	1.02833
LOC101926943	-6.42488	-4.865	-1.32063
HS6ST2	-6.51258	-14.8867	2.28584
CAMK2N1	-6.64998	-8.27581	1.24449
DAPK1	-6.66664	-9.63671	1.44551
MCC	-6.70943	-8.77628	1.30805
GPR63	-6.72927	-7.19772	1.06961
SPTLC3	-6.77612	-10.624	1.56786
MANEA-AS1	-6.80611	-10.0503	1.47666
REEP1	-6.87357	-8.81494	1.28244
B3GNT6	-6.94146	-4.38656	-1.58244
CYP7A1	-6.9689	-16.2132	2.32651
MATN2	-7.0009	-11.5998	1.6569
CDHR1	-7.00163	-6.79588	-1.03028
ADM	-7.04168	-12.9226	1.83516
ST6GALNAC5	-7.04593	-14.2737	2.02581
WDR38	-7.0676	-5.23693	-1.34957
OIT3	-7.09159	-3.78927	-1.87149
MYRIP	-7.19089	-8.77774	1.22068
MMP16	-7.19787	-4.45097	-1.61715
C9orf92	-7.23102	-3.04918	-2.37146
SYT1	-7.25784	-13.3979	1.84599
TMEM140	-7.26111	-5.80349	-1.25116
FAM182B	-7.27592	-8.23039	1.13118
MANEA	-7.29046	-8.9175	1.22317
TLL1	-7.30847	-10.8323	1.48216
TGM3	-7.36206	-4.61068	-1.59674
ACKR3	-7.39162	-8.12079	1.09865
DIO1	-7.47249	-8.2422	1.10301
IL1RN	-7.53125	-13.5153	1.79456
MYLK	-7.65674	-10.6444	1.3902
ACTRT3	-7.65902	-12.135	1.58441
PPP1R14C	-7.72299	-8.39575	1.08711
FAM177B	-7.73306	-6.99842	-1.10497
APLF	-7.79328	-11.4806	1.47314
MECOM	-7.82435	-13.5208	1.72804
EFHC2	-7.83656	-5.22199	-1.50068
PCDH11X	-7.85205	-10.7173	1.3649
CNTN2	-7.86218	-3.76863	-2.08622
CTTNBP2	-7.89221	-3.40136	-2.32031
ADD2	-7.97951	-7.36594	-1.0833
SLC5A1	-7.98244	-11.31	1.41686
CNBD1	-8.0955	-12.2716	1.51585
COL5A2	-8.12253	-13.1089	1.61389
ROR2	-8.2317	-10.3324	1.2552
IL36G	-8.38441	-16.9044	2.01617
KLHL32	-8.45222	-6.88397	-1.22781
C5orf66	-8.52997	-13.4742	1.57963
NDP	-9.24793	-3.41229	-2.71018
FAM198B	-9.38574	-8.70528	-1.07817
KCNU1	-9.44277
HEPACAM	-9.59405	-10.2372	1.06704
LOC647859	-9.89884	-14.07	1.42138
MYB	-9.90097	-12.1547	1.22763
PCED1B	-9.96742	-23.1762	2.3252
STAC	-10.1456	-15.2653	1.50462
UGT2B15	-10.2557	-9.08905	-1.12836
ABCG2	-10.8497	-9.83231	-1.10347
LINC01279	-10.9307	-19.2224	1.75857
CERK	-11.2065	-14.8543	1.32551
PTPRB	-11.2734	-8.48703	-1.32831
VWA2	-11.4693	-20.4934	1.7868
CCDC80	-12.0015	-9.60563	-1.24942
CSRNP3	-12.0557	-10.2339	-1.17802
SLC17A4	-12.0647	-9.25081	-1.30418
NOV	-12.626	-3.16301	-3.99177
SLC6A20	-12.8566	-10.0901	-1.27418
FFAR2	-13.9015	-11.6952	-1.18865
ABCB11	-15.1034	-6.15142	-2.45527
MET	-15.3056
VAV3	-16.1461	-15.9968	-1.00933
MID1	-16.2275	-15.8743	-1.02225
SLC30A10	-17.0965	-9.36332	-1.8259
FLT3	-17.3662	-10.6626	-1.6287
SI	-17.5914	-26.9851	1.53399
SYTL2	-18.5346	-25.4496	1.37309
ABCA12	-19.2231	-6.59494	-2.91483
LRRN1	-20.0153	-19.8745	-1.00708
MAN1A1	-20.408	-31.9847	1.56726
OPRK1	-22.0122	-14.0775	-1.56364
CCDC83	-26.1683	-29.011	1.10863
PEG3-AS1	-28.354	-17.603	-1.61075
ABCA1	-29.9124	-48.5416	1.62279
CXorf36	-30.3213	-29.0233	-1.04472
PLD1	-32.362	-85.3708	2.638
LRRC31	-39.0635	-48.0538	1.23015
MEGF10	-40.9301	-26.0096	-1.57365
AMIGO2	-41.1277	-76.5696	1.86175

## Sheet: DGE control LNCaP
Genes differentially expressed with R1881 vs vehicle treatment unique to control LNCaP cells - present in heatmap in Figure 5A and absent from heatmap in Figure 5B
Gene Name	Fold Change in Control LNCaP Cells with R1881 treatment
PAPLN	5.09573
PNLIPRP3	5.07051
LGI3	4.87246
ST8SIA6	4.15797
TMEFF2	3.89321
SKP1P2	3.80807
LPHN2	3.73045
PPP4R1L	3.6093
GHRHR	3.39721
TNFRSF19	3.32695
SH3RF2	3.29372
PREX2	3.15069
CSNK1A1L	3.12587
ITIH6	3.0997
NTNG1	3.08682
CCDC85A	3.03253
ITGB6	3.02856
HCLS1	3.00643
FLJ44635	2.9821
SNCA	2.95466
CDKL1	2.94744
ASCL4	2.84806
PRDM1	2.84199
CDHR3	2.84149
LINC01018	2.7971
HRH3	2.78524
C8orf46	2.76106
NTNG2	2.75078
LOC100652999	2.67508
ANGPTL3	2.67185
LOC101929295	2.65503
ZP1	2.63091
GPC5	2.59964
ANKK1	2.59614
VWA5B1	2.58089
GABRG3	2.539
PLCL1	2.51481
RASGRP2	2.49203
PIK3AP1	2.49021
ZSCAN12P1	2.47782
SLA2	2.47099
HIST1H1D	2.43684
SEPT5	2.43186
LOC101929613	2.41476
MIR3648	2.37239
MESP2	2.36084
EEF1DP3	2.35044
TLR6	2.34927
BPIFA4P	2.34725
LOC101927718	2.33846
PIEZO2	2.32639
PHYHD1	2.28915
DNER	2.26996
TGM5	2.26857
LRRN4CL	2.25238
RPL13AP20	2.24053
RNF112	2.24002
NPR2	2.23214
POPDC2	2.21349
SGK2	2.2131
MIR3687	2.19978
RDH10	2.19517
JAG1	2.18766
LINC00221	2.18297
BTBD11	2.15435
PXDC1	2.14999
MAATS1	2.14447
KCNJ2	2.11566
GCNT1	2.11106
SLC25A30-AS1	2.07524
AIM1	2.04282
AGR2	1.9845
TECTA	1.98431
C19orf73	1.96834
REPS2	1.96661
FAM129A	1.96605
ZNF503	1.95764
LOC101929655	1.93823
OBSL1	1.93247
PRR16	1.90512
GNG10	1.88232
KLF2	1.85993
ANKRD9	1.83391
VPS9D1	1.82629
FOSL2	1.81983
CHST12	1.80872
NXN	1.80155
C17orf53	1.79884
EIF2AK3	1.79507
ELF4	1.79429
RPS17	1.7784
CDKN1C	1.77293
PRSS36	1.76292
LDHD	1.75656
MEX3D	1.75142
MSX1	1.74336
TTC4	1.73519
MAOA	1.73266
KCNH2	1.72572
FZD1	1.72071
ATG4D	1.72053
MVB12A	1.71954
FUT4	1.71807
CHST11	1.70839
LRRC26	1.69336
SOD3	1.68288
FBXL14	1.6826
TNFSF4	1.68107
DEDD2	1.67848
LINC00115	1.67705
RPS6KA4	1.67561
C9orf72	1.66978
ABCA7	1.66951
KLHL26	1.66744
MFSD7	1.66178
DNAJB5	1.66002
NDUFA4L2	1.65997
RTN4RL2	1.65986
NKPD1	1.65785
PPP1R37	1.6533
PGBD5	1.65072
MCFD2	1.64979
TM2D2	1.64732
PPM1A	1.64585
WDR24	1.64277
TULP3	1.64044
CALR	1.63832
LARGE	1.63692
BAZ2A	1.63579
PLEKHM3	1.63478
LOC389765	1.63463
FSTL1	1.63236
C19orf47	1.62973
PKI55	1.62323
CPLX1	1.62309
TSPAN33	1.62188
TP53TG1	1.62148
GPR89B	1.61948
TECPR1	1.61488
ATP5E	1.61439
CLEC7A	1.6142
DERL2	1.61183
ARHGEF26	1.60998
ZNF165	1.60917
ARCN1	1.60811
CYB5A	1.6079
PXDN	1.6065
SIX5	1.6052
SPATA2	1.6051
CNOT3	1.59922
GALK2	1.59918
CHMP6	1.5969
LY6E	1.59681
LRFN3	1.59497
SPRED1	1.59398
TMEM143	1.5939
MXD4	1.59116
TTC12	1.58565
BAD	1.58411
STK11	1.58333
KCTD5	1.5833
KIAA0355	1.57735
PLEKHO2	1.57542
SIGIRR	1.5746
L3MBTL3	1.57432
ZNF672	1.57399
PRKACA	1.57137
KCND3	1.57075
FZR1	1.57031
CNFN	1.56963
TSPAN4	1.56937
ZNF865	1.56553
NUPL1	1.56442
GPRC5B	1.56363
GTSE1	1.56358
CLTB	1.56304
PRR24	1.56243
PNPLA8	1.56235
RAB11FIP5	1.56225
NUCB1	1.56084
SNHG9	1.55971
RAB28	1.55926
NUP50-AS1	1.55907
PELO	1.55904
SLC35C2	1.55902
NAAA	1.55806
GPR89A	1.55793
GTPBP1	1.55707
ELL	1.5569
DNAJB11	1.55371
ZNF358	1.55336
ZCCHC9	1.55267
FBXL19	1.55194
DNASE2B	1.5507
PVRL1	1.5491
CLEC16A	1.54892
ADAM9	1.5451
DEGS1	1.54465
FADD	1.54301
PPIC	1.54241
ARL2	1.54152
DGAT1	1.54044
PCYT1A	1.53958
NOMO2	1.53885
CTNS	1.53816
ARID5B	1.53469
CABLES2	1.53456
LEPREL4	1.53447
TAOK2	1.53432
GGT1	1.53405
HAGH	1.53384
TMED7	1.53297
MXD1	1.53202
ETNK2	1.532
CITED2	1.53096
ANAPC2	1.5305
BCL9L	1.53024
ARSA	1.52889
GHR	1.52654
FITM2	1.52553
SETD3	1.52511
FAM83E	1.52425
LSM12	1.52368
METRN	1.523
BET1	1.52267
PPP6R2	1.5225
ZBTB1	1.52219
PPP4C	1.5221
ADCK5	1.5212
ATP5D	1.52044
GOSR2	1.52019
CDC42BPA	1.51845
PIH1D1	1.51843
C7orf50	1.51832
CASKIN2	1.51815
DGCR2	1.51811
CCDC107	1.51798
AP5S1	1.51759
SLC26A11	1.51715
RPS6KA1	1.51698
CACFD1	1.51678
STARD5	1.51603
OGFOD3	1.51549
ZBTB45	1.51544
FAM73B	1.51514
MESDC2	1.51409
RPH3AL	1.51409
RER1	1.51403
SHANK3	1.51366
KDELR3	1.51341
ZNF747	1.51233
SLC35B1	1.51205
YARS2	1.51118
TSEN34	1.51114
RAD54L2	1.5104
RHOB	1.50982
TBC1D13	1.50778
C19orf60	1.50675
FADS3	1.50665
ERLEC1	1.50629
FAR2	1.50575
ERP44	1.50522
ARHGAP6	1.50486
PLA2G15	1.50475
ACTL10	1.50437
WTH3DI	1.50413
UBE2J2	1.50397
ABHD8	1.50324
ANKRD39	1.50307
SQLE	1.50229
GAK	1.50188
ARL4C	1.50162
C19orf52	1.50159
ULK1	1.50138
RAB1A	1.50086
WASH2P	1.50066
XRCC3	1.50046
ZMPSTE24	-1.50044
RPAP3	-1.50085
GUF1	-1.50119
GAS5	-1.5015
RIOK3	-1.50217
THOC1	-1.50242
TAF1A-AS1	-1.50304
EPRS	-1.50306
TMEM67	-1.5032
DENND3	-1.50329
PYROXD1	-1.50496
DYNC2H1	-1.50511
SLC16A13	-1.5066
AEBP2	-1.50804
SV2C	-1.50893
PLXDC2	-1.50921
ZC2HC1C	-1.50937
LOC642236	-1.51141
GBP2	-1.51273
ATG14	-1.5138
THAP9	-1.51395
TPP2	-1.51555
N6AMT1	-1.51709
GATS	-1.51711
ZNF124	-1.51802
CSTF3	-1.51854
DDX26B	-1.51857
ESYT3	-1.51867
CAND1	-1.52325
UBR2	-1.52368
NOL8	-1.5264
RNF182	-1.52661
SLC29A1	-1.52705
CHCHD7	-1.52761
PCDHGB4	-1.52896
IDNK	-1.52934
NR2C1	-1.53035
ITPR1	-1.5311
ZNF540	-1.53275
MTF2	-1.53281
C5orf63	-1.53396
UPK3A	-1.53531
APITD1	-1.53757
SAMD13	-1.53821
FRMD6-AS1	-1.53847
ACYP1	-1.53909
PNMA3	-1.54079
FASTKD3	-1.54208
ZNF852	-1.54337
ODF2L	-1.54819
CMSS1	-1.54824
METTL5	-1.5486
ZNF420	-1.54958
ZNF569	-1.55028
NSUN6	-1.55093
SYF2	-1.5521
ATP1B1	-1.55463
COX20	-1.55553
TP53	-1.55663
MTERF	-1.55698
ACSL4	-1.55763
BBS12	-1.55921
BBC3	-1.5601
DOPEY1	-1.56084
ASUN	-1.56466
MBTD1	-1.56562
TUBA1A	-1.56581
ETAA1	-1.56663
LUC7L3	-1.56669
FASTKD1	-1.56673
FAM161B	-1.56704
HNRNPA1	-1.56733
SP110	-1.56918
SLC5A3	-1.56995
SNORD22	-1.57465
RPL36A	-1.57631
CCDC176	-1.57733
PTPRE	-1.5792
JAKMIP1	-1.58034
ZC3H8	-1.58146
ISX	-1.58255
ZNF461	-1.58276
DHX36	-1.58658
FGD3	-1.58787
SLC6A11	-1.58868
TANK	-1.59501
R3HCC1L	-1.59597
SNORA68	-1.60061
AGPS	-1.6013
KHK	-1.60331
CDK17	-1.60373
SNORA8	-1.6119
YAE1D1	-1.6121
SLC6A16	-1.61284
SSFA2	-1.61355
SLC35E3	-1.61633
CIART	-1.61639
HEPH	-1.61863
EFCAB2	-1.62224
DLEU1	-1.62611
SNORA26	-1.62952
SNORA12	-1.63038
FLJ23867	-1.63047
ZNF665	-1.63127
BRDT	-1.63157
PRMT3	-1.63279
ZNF519	-1.63329
BRINP3	-1.63339
SCAND2P	-1.63406
PROCR	-1.63868
METTL8	-1.64214
PRRG1	-1.64397
CASC2	-1.64818
MAST4	-1.64928
PRKY	-1.64936
MRPS6	-1.65124
FAM45B	-1.65274
HNRNPA1L2	-1.65431
NREP	-1.6548
SAMD5	-1.65733
DCAF13	-1.65805
TRNT1	-1.65859
ZNF619	-1.65899
MAP3K14	-1.66226
GPNMB	-1.66235
THG1L	-1.6631
LINC00950	-1.66769
TIGD1	-1.66779
SPTY2D1-AS1	-1.66874
FAM216A	-1.66902
SNORA33	-1.66998
ARRDC4	-1.67624
SNORA10	-1.67852
C7orf63	-1.68106
GULP1	-1.68368
PTOV1-AS1	-1.68385
ACOX2	-1.6905
LOC399815	-1.69107
SCARNA7	-1.69205
SNORD76	-1.6958
ZBTB26	-1.70018
CISH	-1.71212
LIAS	-1.71503
ISL2	-1.72082
LOC100499489	-1.72608
SNORA21	-1.73165
PRKCE	-1.73338
FANK1	-1.73558
SNORA49	-1.74018
BTG3	-1.74091
ARMC2	-1.7445
RPS16	-1.74457
ARHGEF28	-1.74785
POU4F1	-1.74908
FGL1	-1.74983
GTF2E1	-1.75003
ZNF781	-1.752
WNT10B	-1.75791
ABHD1	-1.75994
SPATA24	-1.76086
BAMBI	-1.76501
CACNA1D	-1.77013
SNORD77	-1.77702
IL17RB	-1.77974
SNORD47	-1.78189
LOC101928068	-1.78234
NABP1	-1.78366
PNPLA3	-1.78893
CEP83-AS1	-1.78999
RNF125	-1.79799
DUSP19	-1.7984
TLE1	-1.80173
OXTR	-1.81203
SLC16A10	-1.81509
RBM26-AS1	-1.81815
MYO15A	-1.82158
FMNL2	-1.82697
SEPT4	-1.83063
RAET1E-AS1	-1.84469
OSBPL10	-1.85942
SCNN1G	-1.8629
PLA2G7	-1.86745
GMPR	-1.87032
HLA-L	-1.87143
CTSC	-1.87179
TSPAN12	-1.87814
REM2	-1.89036
SNORD46	-1.89448
BZRAP1-AS1	-1.89787
GPR133	-1.89912
STAM-AS1	-1.90574
GPD1	-1.90645
TCF7L2	-1.91058
ARL4D	-1.91808
ABCC5	-1.92968
HMGCS2	-1.93363
KLF3-AS1	-1.93671
SNORA45A	-1.94374
HOXA1	-1.94489
MIR1204	-1.94739
ENC1	-1.94919
GPC6	-1.95169
SPNS2	-1.96794
TAS2R19	-1.97028
RNU12	-1.9736
FA2H	-1.97645
TRPM5	-1.98372
ZNF860	-1.99129
WDR96	-1.9973
TEX19	-2.00279
ADRA2C	-2.00397
TDRD1	-2.00683
NUDT11	-2.0435
NOS3	-2.04686
ATP6V1G2	-2.0582
CAPN12	-2.06629
LOC101928063	-2.07549
PTCH2	-2.08785
EFHB	-2.08921
XKRX	-2.09449
SNORA34	-2.09946
FSD1	-2.10843
FBXL13	-2.11222
ATP12A	-2.11229
POU5F1B	-2.11279
CCNJL	-2.13567
P2RY2	-2.14007
TSPAN7	-2.14456
AEBP1	-2.1525
C12orf60	-2.15692
AKR1C2	-2.17144
ZNF663P	-2.17786
HOXB3	-2.22782
ANTXRL	-2.23069
PCAT1	-2.23259
UCP3	-2.23332
MED4-AS1	-2.23434
TCTEX1D4	-2.24554
MINOS1P1	-2.25538
C14orf37	-2.2571
FAM66A	-2.25978
ADAMTS14	-2.27732
LINC00856	-2.28263
SNORA53	-2.29274
C10orf54	-2.29482
LRRC9	-2.29638
TMED10P1	-2.29767
C8orf34	-2.30093
ALB	-2.30424
SMC5-AS1	-2.31003
HRK	-2.31504
HMCN1	-2.31569
GRIN1	-2.31668
SNORA71A	-2.31766
CACNA1I	-2.32028
CYP2W1	-2.32569
TRIM29	-2.32871
DPRXP4	-2.33184
CHADL	-2.3326
AGPAT9	-2.34218
FRMPD2P1	-2.34481
LOC100128573	-2.34975
TSHZ2	-2.35924
CYP1A2	-2.36235
SCNN1B	-2.36282
LOC100128770	-2.37025
TMEM232	-2.37132
LOC101927492	-2.37494
FAM154B	-2.38414
SLC6A12	-2.3849
FAM65C	-2.38654
PHYHIP	-2.39439
SNORA66	-2.39522
UPK1A	-2.40497
SNORA15	-2.40964
PVRIG	-2.41126
LAPTM5	-2.4134
CCDC184	-2.41818
HIF1A-AS1	-2.41922
DUSP5	-2.42207
LINC01208	-2.42214
GSTA2	-2.43075
MIR181A2HG	-2.44155
CPNE4	-2.45127
HOXA-AS3	-2.45976
GDNF-AS1	-2.46002
NLRP11	-2.46485
STOM	-2.46788
ATOH7	-2.47639
ITPR1-AS1	-2.47722
HAS3	-2.4784
DAB1	-2.48645
HNF4G	-2.50651
LOC100506321	-2.51289
PRKAG2-AS1	-2.51465
NT5E	-2.53348
SLC35F4	-2.5361
OXCT1-AS1	-2.53865
LINC00565	-2.54436
C5orf60	-2.546
SNORA74A	-2.54675
SSTR5-AS1	-2.54836
LINC00639	-2.54866
DPF3	-2.55498
IFITM1	-2.56449
MED14OS	-2.56541
CD55	-2.57211
HCG8	-2.58388
ADORA1	-2.5872
HCG14	-2.59787
ENKUR	-2.62653
ZIC5	-2.62819
AKAP14	-2.63185
MB21D2	-2.63554
REG4	-2.64636
DNAH11	-2.64649
GUSBP5	-2.66159
PTPRC	-2.68675
C8orf37-AS1	-2.69075
SRPX	-2.69381
HM13-AS1	-2.696
LINC00536	-2.69665
LSAMP-AS1	-2.69712
C1orf220	-2.70682
LOC101927102	-2.74415
ASB16	-2.74438
P4HA3	-2.75496
KRT20	-2.79378
HLA-DOB	-2.79555
TRIM49C	-2.80655
PCNA-AS1	-2.8169
NCKAP5	-2.82935
COL13A1	-2.83471
RAET1L	-2.84636
C1orf127	-2.88206
TMEM51-AS1	-2.88372
ENDOU	-2.88854
LRRC2	-2.89311
RAB40A	-2.92126
VTCN1	-2.96126
PIWIL2	-2.9825
GPR37L1	-2.9845
ARSJ	-3.12066
THEG5	-3.13388
TMEM200B	-3.15699
ZNF32-AS1	-3.22619
LOC101928784	-3.26348
TNNI1	-3.27347
MSMP	-3.28283
MPP1	-3.28873
SPTSSB	-3.29525
PRAMEF12	-3.30929
COL4A3	-3.33304
LINC00933	-3.33862
GPR85	-3.36895
RASL11A	-3.40655
BEND5	-3.41975
PROZ	-3.45108
FAM138E	-3.55601
PATL2	-3.55628
AKR1C1	-3.55944
STMN4	-3.60335
CPAMD8	-3.64212
SH2D3C	-3.7014
LINC01239	-3.90004
LINC00675	-4.09309
MUC19	-4.44937
CLEC2A	-5.37159

## Sheet: DGE MED19 LNCaP
Genes differentially expressed with R1881 vs vehicle treatment unique to MED19 LNCaP cells - present in heatmap in Figure 5B and absent from heatmap in Figure 5A
Gene Name	Fold Change in MED19 LNCaP Cells with R1881 treatment
TGFB2	12.5966
SH3RF3	7.37355
RNF133	7.12648
CYP4F22	6.98413
PDE6A	5.73248
LAMC2	5.24303
IGFBP5	5.05955
EGR1	4.74175
MGC45922	4.42627
LRRC36	4.34814
IGFBP1	4.10491
ARHGAP9	4.03198
LOC284578	3.99368
AMTN	3.86444
LOC440461	3.83905
GCGR	3.82741
FHL2	3.65664
CHN2	3.64132
MYH7	3.64043
CLDN14	3.61504
PPP4R1L	3.6093
POTEKP	3.59774
RASL10A	3.54496
PPP3R2	3.53828
IL22RA1	3.48848
LOC101928766	3.47085
RRS1-AS1	3.43555
TMEM37	3.41435
JMJD1C-AS1	3.39333
IL10RB-AS1	3.35462
TSC22D1-AS1	3.31841
ACSM5	3.31277
OSBPL7	3.28285
CD4	3.17813
FOXD4L3	3.15835
C18orf61	3.15056
LINC00628	3.13099
RUFY4	3.0579
KCNC3	3.03616
PLEKHG1	3.02822
RGS9	3.02579
STARD4-AS1	3.02237
ST20-MTHFS	3.0222
SCLY	3.00682
MAGEA11	2.97016
RBM5-AS1	2.96567
EPSTI1	2.96493
LGSN	2.96212
ASTL	2.95277
BASP1	2.95042
AKR7A3	2.93883
HMMR-AS1	2.93486
FAM212A	2.89881
ADORA2A	2.89423
PPARGC1A	2.85019
LOC101927318	2.84954
LOC286190	2.82713
OR4F13P	2.82333
SNTN	2.82208
GTF2IP1	2.81759
TTC29	2.81175
FAM131B	2.78868
MIR15A	2.78479
GALNT13	2.78051
MTMR7	2.76715
LOC400655	2.74902
LUCAT1	2.74887
RGMA	2.73746
SLC10A6	2.71948
LINC01132	2.71507
PAX8	2.71244
LOC101927117	2.69295
CD109	2.68248
LOC101928449	2.66859
C22orf15	2.65623
CUBN	2.62364
EPHA4	2.61083
GIPR	2.59955
LOC100129083	2.58894
IL17C	2.55859
WDR63	2.55634
LOC648691	2.55445
LOC442028	2.54557
CCL5	2.54257
C6orf163	2.53362
SPATA3-AS1	2.53004
C6orf118	2.52394
TFAP2A-AS1	2.51621
FGF12	2.51298
C1orf204	2.4982
PPP1R1B	2.4978
DAND5	2.49526
NEURL1	2.48282
SH3GL2	2.4719
PPAN	2.46133
LINC00595	2.45694
DMRT1	2.44905
MYL9	2.44659
KCNJ2-AS1	2.43932
LRRC46	2.43373
EFHD1	2.43344
RXFP3	2.42969
LOC102723513	2.42209
SPACA6P-AS	2.41716
LOC102724050	2.40794
IQCA1	2.39285
GOLGA8N	2.39194
NTS	2.37878
LOC646471	2.37588
GAS5-AS1	2.36813
LOC100507250	2.36348
ALDH1L2	2.35822
LINC00885	2.35788
BEND3P3	2.35559
GPR158-AS1	2.34497
RHCE	2.34038
KATNAL2	2.33955
HLA-DPA1	2.32874
MYOM1	2.32408
SOCS1	2.3166
KRT6C	2.31171
CHRNA10	2.31089
MED19	2.30255
SLC39A2	2.2939
ZIM2	2.28946
SLC12A4	2.28774
SLC9A9	2.27104
PKIA	2.26861
MFSD6L	2.25043
PPIL6	2.23997
LINC01354	2.23986
RHOBTB1	2.23162
PLIN1	2.2239
SYCP2L	2.22266
TMEM217	2.22077
CSTA	2.21376
GJB2	2.21261
TNKS2-AS1	2.20935
SRSF12	2.2032
TAS2R14	2.19055
CTRL	2.18359
SMIM5	2.15264
PIPOX	2.13434
CLDND2	2.12744
PCDHGB8P	2.1107
ZNF593	2.10631
ANO7	2.0775
LOC642423	2.06431
NOP16	2.0471
OPRL1	2.04639
CHD5	2.04559
SLC1A3	2.04286
SUGT1P1	2.03898
STAG3	2.0322
PCDHB19P	2.03122
GPC5-AS1	2.02263
IFT57	2.01978
RMRP	2.0182
S100A4	2.01213
TNFRSF8	2.00212
LRP4	2.0013
IPCEF1	1.99952
CD274	1.99776
TRIM52	1.99512
SYCP2	1.98091
PCDHB7	1.98068
EIF4EBP3	1.97002
BST2	1.96688
HSD11B2	1.96662
RHBG	1.96349
SCN8A	1.93977
VIM-AS1	1.92254
LOC100506804	1.91857
KCP	1.9122
DHRS2	1.907
PCLO	1.90659
TP53TG3D	1.90581
ELFN1-AS1	1.89726
E2F1	1.89643
EIF4EBP1	1.88892
ALG1L9P	1.88683
IQCB1	1.88557
PKMYT1	1.88527
SLC22A1	1.88327
LINC00921	1.87935
GAL	1.87834
LOC100507424	1.87755
FAM111B	1.87697
RHBDL1	1.87664
URAHP	1.87537
CSPP1	1.87242
UBIAD1	1.87132
FAM46C	1.86607
HIST1H2AG	1.85814
PPARGC1B	1.85443
NOP2	1.85308
CCDC157	1.85154
C10orf95	1.85037
GNG4	1.8469
CD3EAP	1.84562
PHF6	1.84504
ARID5A	1.84279
BYSL	1.83528
LOC653712	1.83393
GLRX	1.83365
STEAP3	1.83114
GRIN2C	1.82952
UOX	1.8257
THBS4	1.81817
FAM13A	1.81776
DEPDC4	1.78885
EFCC1	1.7883
PLEKHA6	1.78328
RAB3A	1.77992
LOC100129917	1.77923
LINC00471	1.77529
SURF6	1.77468
EHBP1	1.77305
DTX2P1-UPK3BP1-PMS2P11	1.77088
PRR22	1.7668
CDNF	1.76279
LOC646903	1.76191
CFAP43	1.7613
DOK1	1.75931
MIR99A	1.75679
C10orf2	1.74918
HIF1A	1.74875
HIC2	1.74832
LAMA3	1.74332
QTRT1	1.74322
PHF11	1.73954
MAGEA2	1.73875
CCDC78	1.73151
MIR612	1.72959
FAM229A	1.72568
TFAP4	1.72565
JHDM1D-AS1	1.72398
WDR90	1.71921
PPIF	1.7186
AKAP5	1.71766
MCM5	1.71762
RHOG	1.7151
C19orf40	1.71435
CHCHD4	1.71379
RGAG4	1.71263
C21orf90	1.71203
ATF5	1.71121
EXOSC5	1.70992
CLUH	1.70645
CIDEB	1.70642
FEN1	1.70623
STS	1.70614
RRP1	1.70518
GCDH	1.7051
TTC39C	1.70393
AOC2	1.69819
THUMPD1	1.69606
UNC5B	1.6948
RNASE4	1.69392
HIST1H2AH	1.69345
QSOX2	1.69079
CCDC85B	1.68897
RTKN	1.68873
SLC25A34	1.68423
LRRC48	1.68314
SLC25A4	1.68122
CCDC138	1.67961
BCRP2	1.67874
PGBD1	1.67848
PCDHGA9	1.67786
NAA10	1.67608
LMO7	1.67432
HIST4H4	1.67315
CCDC115	1.66996
NAF1	1.66979
CCDC137	1.66861
ENO1	1.66808
NOSTRIN	1.66718
CCDC71	1.66639
CRY2	1.66576
WWC3	1.66568
C14orf79	1.66418
SLCO4A1	1.6639
IZUMO4	1.6635
SMAD6	1.66307
SEMA7A	1.66291
C7orf43	1.66168
SPRYD3	1.66086
C17orf97	1.6608
PHLDA1	1.65951
BTN2A3P	1.6592
TMEM52	1.65862
ANKDD1A	1.65762
FUT11	1.65686
ST20	1.65585
LOC100507053	1.65549
ZFAND2A	1.65495
REXO4	1.6549
THAP7	1.65427
HPCAL1	1.65059
TOB1	1.6498
UGT2B11	1.64783
C6orf52	1.64765
MAPK8IP3	1.64677
NUDT18	1.64577
PER2	1.64389
RRP7A	1.64042
RHBDF2	1.63867
CAMKK1	1.63854
ALG3	1.63819
EPN3	1.63761
LOC100506299	1.63715
PLEKHN1	1.63679
POMT2	1.63636
CHST3	1.63581
TRIB3	1.63562
TBC1D25	1.62941
ZBTB20	1.62876
MIR17HG	1.62662
GPT	1.62645
SPRY1	1.62549
ERAP2	1.62408
ARMC5	1.62312
ANKMY1	1.62288
TMEM14C	1.62244
PDXP	1.62142
KIAA0020	1.62038
WDR45	1.61999
SURF2	1.61875
HIST1H2AL	1.61805
WDR55	1.61542
PEBP4	1.61479
ZNF574	1.61475
RANBP2	1.61444
HGS	1.61404
SCARNA2	1.614
CLPTM1	1.61369
RARA-AS1	1.61311
LOC652276	1.61225
MTG1	1.61157
ZNF696	1.61053
VPS9D1-AS1	1.60818
TMEM177	1.60791
DPH1	1.6079
LPIN1	1.60736
YOD1	1.60726
WDR46	1.6065
TPM3P9	1.60643
ZNF239	1.60574
LETM1	1.60491
SWSAP1	1.60323
MRPL17	1.60301
BRPF1	1.60136
RBCK1	1.60107
ORMDL2	1.60026
POLM	1.59959
C8orf44	1.59895
ARMCX5-GPRASP2	1.59893
JAG2	1.59889
KITLG	1.59879
PELP1	1.59873
HNRNPF	1.59828
NR2C2AP	1.59806
IFI27L2	1.59785
MTHFD1L	1.59659
SNORD74	1.59558
HDHD1	1.59546
YARS	1.59538
MATN1-AS1	1.59523
GSTO2	1.59478
ZNF625-ZNF20	1.59454
HOXC5	1.59363
ZNF518B	1.59349
SIX1	1.59228
ARHGDIA	1.59152
PRSS53	1.5914
LRRC61	1.59046
SNHG17	1.59033
LIMS1	1.59016
MRTO4	1.58972
TIMM23B	1.58955
KLHL17	1.58927
IPO13	1.58896
LIN37	1.58881
UBL4A	1.58862
OLA1	1.58754
SZT2	1.58743
PCDHGA6	1.58605
DNAJA3	1.58581
SHISA5	1.58579
SRXN1	1.58446
RASSF1	1.5823
IMP3	1.58225
ZNF614	1.58179
RUVBL2	1.58153
KBTBD11	1.58136
PES1	1.57937
MRPL14	1.57936
SAP25	1.57884
CTDP1	1.57856
SLC2A4RG	1.57849
PGAM5	1.57796
SNORA76C	1.57764
ZNF577	1.57741
ISG20L2	1.57701
TMBIM1	1.5769
MRPL4	1.57639
H2AFX	1.57611
SEC14L1	1.57594
THAP4	1.57592
TBRG4	1.57588
PPP6R1	1.57543
CLK3	1.5754
TNFRSF10A	1.57474
FIZ1	1.5746
MAP1LC3A	1.5727
KTN1-AS1	1.572
FAM207A	1.57184
ZNF511	1.57136
COA4	1.57135
AHCY	1.57127
SLC25A16	1.57109
C1orf228	1.57046
RHPN1	1.57018
ATP6V1D	1.56958
FNBP1L	1.5694
MAP2K7	1.56726
MND1	1.56726
MAP2K3	1.56562
TASP1	1.56523
AMT	1.56492
JPH1	1.56411
HSF1	1.56376
ZNHIT1	1.56344
ARRDC2	1.5633
ATP13A1	1.56321
RPIA	1.56167
PLAGL2	1.5616
LSM6	1.56063
LSM6	1.56063
RIN2	1.56058
SLC25A5	1.55987
MKLN1	1.55978
SMG1P3	1.5585
E2F4	1.55832
MRPL36	1.55811
PEX16	1.55735
POLR3H	1.55723
ACTG1	1.55718
C19orf26	1.55701
LMLN	1.55689
PMM1	1.55632
CHTF18	1.55612
MAML3	1.55605
AP1S2	1.55557
PCDHB16	1.55432
LSM7	1.55403
ZYX	1.55385
COMT	1.55349
EHMT1	1.55148
U2AF2	1.55137
HSF4	1.55114
WDR74	1.55112
AGO2	1.55076
H1F0	1.55071
CDK10	1.55046
GOLGA2P5	1.54988
PLXNA1	1.54978
UBE2O	1.54969
ZNF761	1.54968
CCDC109B	1.54955
POLR2L	1.54938
CLASRP	1.54934
ZNF649	1.54917
ZNF276	1.5489
ZNF324	1.54845
TRMT2A	1.54844
HIST1H3J	1.5473
AGPAT5	1.54695
DPM2	1.54655
ENTPD1-AS1	1.54646
DUSP3	1.54642
SAFB2	1.54607
BAK1	1.54574
UHRF1	1.54528
FOXP1	1.54412
THEM6	1.54396
TMEM86A	1.54375
TTC25	1.54361
NOC2L	1.54202
C9orf43	1.54192
RPLP0P2	1.54159
ITPRIP	1.54131
NELFA	1.54087
PHF23	1.54066
TES	1.53974
EXOSC3	1.53951
ASPHD1	1.53929
NDUFAF2	1.53917
SLC36A4	1.5391
FLNA	1.53864
GEMIN7	1.53863
ATG4B	1.53854
SNHG15	1.53675
CD164	1.53618
PDXDC2P	1.53576
AGAP3	1.53539
WNT5A	1.53539
PSMD5	1.53535
FAM89B	1.53498
EIF4G1	1.53487
ACAD11	1.53369
RNF31	1.53358
SLC25A35	1.53303
MAPK15	1.53286
NDUFA11	1.5314
TWF2	1.53134
SCO2	1.53118
POLR1A	1.5309
URB2	1.53071
PUF60	1.53012
FAM53A	1.52986
PDCD2L	1.52961
ARPC4	1.52924
POMGNT1	1.529
TIMM23	1.52871
DHX34	1.5287
MLLT1	1.52852
NR1H2	1.52842
XPO6	1.52839
ITPA	1.52744
EPHX2	1.5268
ARFRP1	1.52636
PSME4	1.52619
DPYSL4	1.52581
EIF2S1	1.52572
ITGB5	1.52388
TGFBR3L	1.52317
FDX1L	1.52298
BMPR2	1.52283
STK19	1.52258
STK32C	1.52243
NUBP1	1.52234
PITPNB	1.5221
RECQL4	1.52122
IL10RB	1.52093
SHC1	1.52078
ZFP41	1.52062
SLC6A9	1.52026
ZBTB2	1.52026
LIMK2	1.51994
LIME1	1.51885
PHF19	1.51847
SPIN2B	1.51828
HIST1H3I	1.51764
C17orf58	1.51729
VARS	1.51688
ABCD1	1.51648
GATAD2A	1.51641
MARVELD1	1.51557
ZDHHC5	1.51536
ACSM3	1.51482
STUB1	1.51396
POLR3D	1.51351
LOC729603	1.51304
LTV1	1.51226
TSPYL1	1.51201
CBY1	1.51112
MRPL2	1.51107
PFDN2	1.51106
TUBB4B	1.51032
MIEF1	1.50914
MTG2	1.50881
PHB	1.50875
SF1	1.50854
FAM213B	1.50782
C7orf55	1.50652
ZNF764	1.50571
MED8	1.50558
TRMU	1.50558
PDCD4-AS1	1.50548
CABIN1	1.50438
ZC3H18	1.50417
ATXN2L	1.50415
CDC42SE1	1.50391
THOC6	1.50386
PWP1	1.50346
NT5DC1	1.50227
RRP7B	1.50155
NLGN4X	1.50127
EIF5A	1.50024
OPN3	1.50015
ACTR8	-1.50089
SEPT8	-1.50152
PPP2R5E	-1.50169
ATP6V1A	-1.50185
MED14	-1.50218
GJB1	-1.50228
ANTXR2	-1.50308
KIAA0196	-1.5031
POLR2J4	-1.50358
DYNC2LI1	-1.50361
OGDHL	-1.50379
IFT74	-1.50384
LRP1	-1.50413
GIN1	-1.50501
PPT1	-1.50536
CHORDC1	-1.50575
RUFY2	-1.50604
MAP3K13	-1.50697
PFN2	-1.50727
STAU2	-1.50772
KLC4	-1.50844
SNX30	-1.50898
QDPR	-1.50939
MAGI1	-1.50981
ZNF699	-1.51011
PPFIA2	-1.51029
CYB561A3	-1.51042
CELSR2	-1.51079
RYR2	-1.5108
TMEM136	-1.51105
ANO9	-1.51119
FAM81A	-1.51213
TBC1D2B	-1.51253
ZNF2	-1.5134
SNX6	-1.51345
ZBTB18	-1.51376
CD59	-1.51429
PATZ1	-1.51432
ZFP28	-1.51446
CCDC121	-1.51453
ZC2HC1A	-1.51471
PBX3	-1.51512
ZNF512	-1.51514
NPAT	-1.51522
SLC16A9	-1.51522
VPS13C	-1.51561
SOS1	-1.51592
RBM41	-1.51622
TMSB4X	-1.51788
RICTOR	-1.51792
ZHX3	-1.51823
TRAM1L1	-1.51883
RNFT1	-1.51892
DDX18	-1.51911
ZNF605	-1.51943
LOC728743	-1.51956
SGCB	-1.51976
CASK	-1.5207
VEZT	-1.52086
CHD9	-1.52136
ZNF33B	-1.5214
SSBP3	-1.52169
CEMP1	-1.52177
RSL24D1	-1.522
ZNF184	-1.52275
C19orf57	-1.52293
ACOT13	-1.52298
COQ10A	-1.52353
STIM2	-1.52549
VPS41	-1.52553
PELI1	-1.5256
POU2F1	-1.5258
CCDC144B	-1.5268
PLEKHA5	-1.52837
NAE1	-1.52891
DENND4C	-1.52936
GPD2	-1.52948
EMC3-AS1	-1.5302
DHFRL1	-1.53109
NFYC-AS1	-1.53115
PCYOX1	-1.5316
C6orf211	-1.53172
FKBP3	-1.53225
ZBED5	-1.53233
FAM168A	-1.53351
DUSP22	-1.53513
IQGAP1	-1.53529
HIST1H3H	-1.53573
METTL18	-1.53593
ATRX	-1.53617
ZNF418	-1.53621
MIPOL1	-1.53704
LOC101928295	-1.5371
B4GALT1-AS1	-1.53768
IQCH	-1.53868
LIX1L	-1.53918
ZNF606	-1.53941
TMEM86B	-1.53952
SCPEP1	-1.54009
MAP4K3	-1.54048
CHD6	-1.54082
BHLHB9	-1.5419
EHD3	-1.54238
LOC90246	-1.54238
PRAC1	-1.54256
MIR3064	-1.54406
CAB39	-1.54424
FSCN1	-1.54721
LANCL1	-1.54727
MDH1B	-1.54814
SNORA52	-1.54822
HIST1H2BL	-1.54889
PPM1L	-1.55007
VAMP4	-1.55082
H2AFY2	-1.55138
ANAPC4	-1.55176
LINC00476	-1.55184
LARP7	-1.55277
ZNF383	-1.55286
INTS2	-1.55297
NEDD4	-1.55345
MITF	-1.55376
TMEM126A	-1.55392
ZNF391	-1.5541
ZNF790	-1.5542
PKD2	-1.55458
SCYL2	-1.55547
TSHZ1	-1.55565
WASF3	-1.55577
ZNF81	-1.55616
TTN-AS1	-1.55642
ZNF573	-1.5566
GOLGA8A	-1.55679
SYNGR3	-1.55782
NIPA1	-1.55841
GUSBP3	-1.55895
LCORL	-1.55924
ANKRD36B	-1.55953
COMMD10	-1.55953
C5orf45	-1.5596
RASSF4	-1.55997
DCLRE1C	-1.56022
LINC01004	-1.56111
TBC1D5	-1.56127
CGRRF1	-1.56133
CHD1	-1.56193
HENMT1	-1.56209
STARD4	-1.56215
SYDE2	-1.56346
CRYZL1	-1.56379
HLF	-1.56415
SOS2	-1.56503
CPD	-1.56504
ITGA5	-1.56548
RPS3A	-1.56577
APC	-1.56691
SLC16A2	-1.56725
SEMA4F	-1.56822
LOC642852	-1.5698
USP1	-1.57014
ZNF281	-1.57037
OXCT1	-1.57079
IGF2BP3	-1.57106
STAG2	-1.57126
DHX40	-1.57142
PIK3CA	-1.57237
CAMK2B	-1.57376
SCCPDH	-1.57395
NSF	-1.5741
ARL6	-1.57589
QRICH2	-1.57639
PCDHGA1	-1.57706
TTC3	-1.57733
CKAP2L	-1.57742
PTAR1	-1.57742
IFT46	-1.5783
IFNGR2	-1.57843
RAB3GAP2	-1.58057
WAC-AS1	-1.58061
ACADSB	-1.58067
GPRIN2	-1.58081
PPM1J	-1.58096
FZD6	-1.581
TAF9B	-1.58158
ARHGAP44	-1.58182
PBXIP1	-1.5824
FARP1	-1.58284
KCTD6	-1.5829
TNFRSF11A	-1.58311
BBS2	-1.58323
ZNF470	-1.58431
TPST1	-1.58557
TMEM68	-1.5865
CHAF1B	-1.58685
FGD6	-1.58855
GSC	-1.58891
SRGAP2D	-1.58901
FOXB2	-1.59002
CEP85L	-1.59006
DERA	-1.59108
SOCS5	-1.59137
ATG2B	-1.59171
KIF16B	-1.59174
ABI2	-1.5918
PTCH1	-1.59197
USP16	-1.5924
ARHGEF12	-1.59249
NLGN4Y	-1.59254
SRD5A3	-1.59271
KMT2C	-1.59281
AP3S1	-1.59289
H2AFJ	-1.59294
SLC25A21-AS1	-1.5935
HS2ST1	-1.59352
MFI2-AS1	-1.5941
AFF1	-1.59414
GPSM2	-1.59455
WDR19	-1.59457
COMMD3	-1.59753
FAM149B1	-1.5976
APPL2	-1.59768
SUGCT	-1.59779
KBTBD2	-1.5981
KIAA1211	-1.5983
AMIGO1	-1.59859
CBX1	-1.59897
FAM169A	-1.59969
EPHA6	-1.60157
TMEM41A	-1.60163
LINC01194	-1.60418
LINC00294	-1.60499
ZDHHC17	-1.60507
LOXL1-AS1	-1.60565
MIR3687-1	-1.60655
KIAA1147	-1.60728
METTL4	-1.60958
RCBTB2	-1.61068
PKIG	-1.61157
FRMD4B	-1.61241
PLCB1	-1.61346
BZRAP1	-1.61427
MIF4GD	-1.61502
EFCAB7	-1.61584
PARD6B	-1.61699
SYP	-1.61792
LOC728752	-1.61794
IPO8	-1.61844
OSER1-AS1	-1.61878
ERCC6L2	-1.61905
SEPT3	-1.61958
KIAA1109	-1.62157
HOTAIRM1	-1.62187
A2ML1	-1.62344
ZNF429	-1.62423
SEC31B	-1.62645
IFI44	-1.62686
WDR72	-1.6271
CASC5	-1.6276
ZNF252P-AS1	-1.62832
DPF1	-1.62867
MTFR1	-1.62892
LOC100129550	-1.63009
C7orf73	-1.63066
LRRC20	-1.63163
NKD1	-1.63314
ZFP36L1	-1.63318
ZFYVE9	-1.63359
RNF6	-1.63899
LOC101926996	-1.63909
MIER3	-1.63916
MMGT1	-1.64022
OTUD1	-1.6405
ZDBF2	-1.6411
CDH24	-1.64128
CREBL2	-1.64403
DGAT2	-1.64407
QKI	-1.64422
PLEKHH1	-1.64426
JMY	-1.64512
IKBKE	-1.64573
LOC374443	-1.6464
CEP78	-1.64689
HIST1H2BJ	-1.64788
LMBRD1	-1.64948
GAB1	-1.65041
LYRM1	-1.65258
ZGLP1	-1.65399
ARHGEF17	-1.65495
LOC100507564	-1.65511
CLCN4	-1.65541
TDRKH	-1.65768
CPS1	-1.65845
CGNL1	-1.65868
DOC2A	-1.66044
HLA-E	-1.66253
RNF130	-1.66335
CRAT	-1.66341
DCLRE1A	-1.66357
PITPNC1	-1.66591
KATNAL1	-1.66607
SLC25A24	-1.66777
RAB3IP	-1.66812
CMBL	-1.66918
ZNRD1-AS1	-1.66958
SLX4IP	-1.67009
SEMA6C	-1.67171
ICK	-1.67343
FUCA1	-1.67428
NBPF1	-1.67768
CCDC88A	-1.67842
ZNF629	-1.67932
NSL1	-1.67934
PGPEP1	-1.67988
ZMYND15	-1.6803
PSTPIP2	-1.68105
STK38	-1.68265
FAM86HP	-1.68377
CECR2	-1.68629
APAF1	-1.68858
RLN1	-1.69058
CAMLG	-1.69117
ZNF514	-1.69281
PCDHB14	-1.69539
SNORD43	-1.69566
GCH1	-1.69589
LHX4-AS1	-1.69911
ELK3	-1.69935
TDH	-1.69954
RASAL2	-1.70257
LTBP2	-1.70348
TRIM25	-1.70356
ATM	-1.70434
ACER2	-1.70511
RP9	-1.7053
BTBD8	-1.70659
ICA1L	-1.70824
C12orf75	-1.70966
CYP3A5	-1.7113
CASP7	-1.71134
GNB5	-1.71162
MYO5B	-1.71247
IRF5	-1.71336
USP15	-1.71382
SLC4A11	-1.7141
EEPD1	-1.71465
HINT3	-1.71861
TSPAN15	-1.71896
DET1	-1.71897
B4GALNT1	-1.72019
SNORA5C	-1.72177
LOC439994	-1.72235
FLVCR1-AS1	-1.72484
ATP6V1E2	-1.72822
LOC100506083	-1.72926
LINC01234	-1.73008
MPP7	-1.7316
PHLPP1	-1.73337
PHLDB1	-1.73468
LNP1	-1.73887
LSM11	-1.74037
LCA5L	-1.74063
C3orf67	-1.74074
TMEM59L	-1.74172
HIST1H1B	-1.74234
ZNF846	-1.74632
DDTL	-1.74691
FAM171A2	-1.74867
TJP3	-1.75329
PRKAR2B	-1.75544
GPR176	-1.75655
B9D2	-1.75724
PCDHB15	-1.7586
IKZF3	-1.76188
USP53	-1.76241
DCST1	-1.76308
APOBEC3F	-1.76436
CNEP1R1	-1.76573
TLN2	-1.76575
LINC00663	-1.76706
PARP14	-1.76763
CLYBL	-1.77054
CACNA2D2	-1.77314
RASA4CP	-1.77315
USP27X	-1.77321
LOC102723373	-1.77453
DCLK2	-1.77458
ITGA6	-1.77675
FKBP9	-1.77796
GOLIM4	-1.77928
TCF4	-1.77952
CYB5R2	-1.78274
UHRF1BP1L	-1.78495
MIR3648-1	-1.78597
ZNF815P	-1.78629
TMEM44	-1.78951
C8G	-1.79226
DDX60L	-1.79429
DNAJC6	-1.79839
ADAMTS20	-1.79947
PIP5KL1	-1.80178
FGFBP3	-1.80246
CA11	-1.80297
SNORA78	-1.80347
CENPE	-1.80402
GSTA4	-1.8054
TTC33	-1.80582
HACE1	-1.80627
AHSA2	-1.80737
LRRC37A3	-1.80745
SNX10	-1.80958
ITGA3	-1.81241
SEC14L1P1	-1.81458
PDGFA	-1.81922
HIVEP2	-1.82387
GPER1	-1.82575
SIK2	-1.82609
CARD9	-1.83048
AOC3	-1.83279
IRX2	-1.83327
AP3B2	-1.83492
SLC39A8	-1.8352
ARG2	-1.83812
ARX	-1.84292
NEK7	-1.846
CRYBG3	-1.84877
EFNB3	-1.8498
P2RY11	-1.85025
RASEF	-1.85107
TIGD3	-1.8514
B3GNT4	-1.8538
KCNMB3	-1.85887
GPR143	-1.85934
ATXN1	-1.8607
GBX2	-1.86215
ITPR2	-1.86295
WHAMMP2	-1.86556
C1orf115	-1.86707
FGD1	-1.87208
VN1R1	-1.87215
PPM1H	-1.87435
LOC339862	-1.87539
PPARG	-1.88477
FCHSD2	-1.89065
SND1-IT1	-1.89135
FBXO24	-1.8943
GOLGA8B	-1.89512
ENTPD3-AS1	-1.89965
TNFRSF10C	-1.90031
MAP1A	-1.90047
PCDHB8	-1.90243
BPGM	-1.90269
ROBO1	-1.90785
KIF18A	-1.9112
CBR3	-1.91243
C3orf35	-1.91642
LINC01125	-1.92153
RAB9B	-1.93045
GABRA3	-1.93125
KIF12	-1.93426
PARD6G	-1.93454
LOC100506125	-1.93766
ANKRD18A	-1.93827
UBA7	-1.94565
MIR200A	-1.94584
CYP46A1	-1.94614
UFL1	-1.94692
HIST1H1T	-1.95345
APBB1	-1.96341
FZD2	-1.96453
AMOTL1	-1.96747
NDRG4	-1.96959
VLDLR-AS1	-1.97164
HFM1	-1.97166
SVEP1	-1.97398
PROB1	-1.9868
PDE1A	-1.9869
RIT2	-1.99727
CATSPERB	-2.00272
STX16-NPEPL1	-2.01752
LMAN1L	-2.03253
EFCAB13	-2.0366
DYNC1I1	-2.03979
FNDC4	-2.04067
MIR6732	-2.05268
EBF2	-2.05989
PHEX	-2.06722
LOC100289495	-2.07569
LRRC6	-2.08561
AKAP6	-2.08771
KAZN	-2.08966
VPS37D	-2.0913
PCDHB18	-2.09227
NLGN1	-2.09837
APCDD1	-2.1045
SLC1A1	-2.11166
PIGZ	-2.11333
SLC25A27	-2.11493
PNMA2	-2.1166
TAS2R31	-2.1292
NHLRC4	-2.1615
EFCAB6	-2.16172
COL28A1	-2.16314
CYP1A1	-2.17118
EPN2-IT1	-2.17784
EHMT1-IT1	-2.18274
UGT8	-2.18336
MIR4784	-2.18977
SKIDA1	-2.19006
LINC00888	-2.19658
FAM149A	-2.2065
MIR33B	-2.20713
PLEKHD1	-2.21923
GSDMD	-2.22165
LINC01087	-2.22726
QRFP	-2.2301
TUSC1	-2.23388
GNRH1	-2.23541
LINC00853	-2.23564
ADCY10	-2.24535
KIAA2022	-2.25671
ARHGAP31	-2.26658
MLXIPL	-2.27886
SPDYA	-2.28439
SLIT1	-2.29982
MOV10L1	-2.30806
PPP4R4	-2.37359
EYA2	-2.37911
ZPLD1	-2.38892
LINC00992	-2.40574
SATB2	-2.41858
FLJ45974	-2.4336
UGT2B4	-2.45212
NGFR	-2.45799
ARG1	-2.4606
TDRD9	-2.47135
UCN2	-2.47286
FBXO48	-2.4767
FJX1	-2.49189
LRRC8C	-2.49331
TMEM151A	-2.50363
MCF2L2	-2.5102
ZCWPW2	-2.52268
HR	-2.52841
CAPS2	-2.5402
FOXO6	-2.54152
ACPT	-2.55774
LOC101928358	-2.56353
FBXO43	-2.57821
TMTC1	-2.5844
FAM166A	-2.60368
LOC101928505	-2.60474
COL10A1	-2.62451
FAM27B	-2.65077
MTSS1	-2.65931
UGT1A1	-2.66453
UNQ6494	-2.67007
KRT6A	-2.67161
DNAJC12	-2.69016
MT1F	-2.70287
CCDC102B	-2.70763
OTOGL	-2.70851
RASL10B	-2.71788
MIR5687	-2.71999
KRT6B	-2.7304
LOC100272216	-2.73286
H19	-2.73794
UCA1	-2.7529
IFFO1	-2.76517
DDX26B-AS1	-2.7792
FLT4	-2.78984
PCDH9	-2.79415
C9orf117	-2.82022
CDH6	-2.82351
CHST8	-2.82453
MIR593	-2.82937
CDH8	-2.87835
KY	-2.87972
LOC284454	-2.88964
FEZ1	-2.90553
ZNF788	-2.91545
RASGRP1	-2.91743
GP2	-2.92276
TPTE2P3	-2.93378
RFPL1S	-2.9363
C21orf49	-2.94956
NPTX1	-2.97704
C22orf42	-2.98531
NFATC2	-2.98808
LOC113230	-2.99362
MIR210	-2.99725
GFPT2	-3.03431
LOC100996693	-3.03471
LOC441461	-3.03705
SLA	-3.05872
CD207	-3.06532
SH3RF3-AS1	-3.06579
LOC101927217	-3.07358
LINC01006	-3.09097
INMT	-3.11008
SULF1	-3.15148
RP9P	-3.15868
PCDHB9	-3.16266
ST7-AS2	-3.16312
FBXL2	-3.16486
APELA	-3.19623
SPANXA2-OT1	-3.21567
FSIP2	-3.22056
N4BP2L1	-3.26287
RASSF8-AS1	-3.27801
SPIC	-3.30287
CLIC5	-3.30885
LOC285629	-3.31555
LOC643542	-3.34598
RNF157-AS1	-3.41224
OR13C2	-3.41309
TFAMP1	-3.42772
MAPK10	-3.47726
SOCS3	-3.48261
LRRC37A11P	-3.49817
LINC00278	-3.49858
TSLP	-3.51258
SLC9A3	-3.5489
STMND1	-3.5805
NPY1R	-3.61251
NXPE1	-3.64976
LTBP1	-3.65221
LOC440028	-3.67257
LOC101928414	-3.67838
LOC100130992	-3.68762
SEMA6B	-3.74818
FBXO22-AS1	-3.88819
LOC100287846	-3.89289
NOVA1	-3.8944
SIX2	-3.90773
STC1	-3.91871
ANKRD2	-3.92358
GDF5	-3.96412
GUCY1B2	-3.97325
FAM19A3	-4.0305
GPA33	-4.07014
FAM131C	-4.09278
HPCAL4	-4.11163
ST8SIA4	-4.29688
MCAM	-4.4988
BMP6	-4.74379
CCSER1	-4.83263
SLC9C1	-5.07058
UNC5A	-5.20634
SRMS	-5.52027
RPE65	-6.02466
PCDH15	-6.36831
CREB5	-6.46778
TINAGL1	-6.86748
LOC101928961	-8.40181
VWC2L	-9.89857
OR51E1	-10.9533
DOCK10	-15.3607
