# Supplementary material for: MED19 alters AR occupancy and gene expression in prostate cancer cells, driving MAOA expression and growth under low androgen
Source: PLoS Genet. 2021 Jan 29;17(1):e1008540. doi: 10.1371/journal.pgen.1008540 (PMC7875385; doi:10.1371/journal.pgen.1008540)
Supplement: S7 Table — AR occupancy scores for PSA and FKBP5 (sheet 1); and list of background peaks for IgG (sheet 2) and FLAG in control LNCaP cells (sheet 3) for ChIP-seq. (XLSX) [file pgen.1008540.s027.xlsx]

## Sheet: PSA, FKBP5 scores
Sites occupied by AR and H3K27ac at PSA (KLK3) in control LNCaP cells, responsive to R1881 treatment - related to venn diagrams in Supplemental Figure S8C
	AR occupancy score			H3K27ac occupancy score
region - bp from TSS	control LNCaP vehicle	control LNCaP R1881	fold change score	control LNCaP vehicle	control LNCaP R1881	fold change score		++	positive occupancy score in with R1881 treatment and a score of zero with vehicle treatment
intron - ~-4000	206.592	267.084	1.29281
TTS - ~-3000	0	21.8868	++
promoter TSS - ~-100	11.1181	126.755	11.4008	83.5076	264.752	3.17039
Sites occupied by AR and H3K27ac at FKBP5 in control LNCaP cells, responsive to R1881 treatment - related to venn diagrams in Supplemental Figure S8C
	AR occupancy score			H3K27ac occupancy score
region - bp from TSS	control LNCaP vehicle	control LNCaP R1881	fold change score	control LNCaP vehicle	control LNCaP R1881	fold change score
intron - ~6000	0	330.248	++
intron - ~5000	0	92.312	++
intron - ~2800	9.21125	289.59	31.4387
TTS - ~1100	219.28	322.444	1.47047	211.168	319.709	1.514
promoter TSS - ~600	0	26.3675	++
intron - ~-1300	0	21.0181	++
intron - ~-3500	81.474	272.79	3.34818

## Sheet: IgG peaks
IgG peaks +/- R1881 - related to venn diagrams in Supplemental Figure S8C
Gene Name	Distance	Annotation	IgG control LNCaP vehicle score	IgG MED19 LNCaP vehicle score	IgG control LNCaP R1881 score	IgG MED19 LNCaP R1881 score
UBC	669	intron (NM_021009, intron 1 of 1)	76.6105	68.8903	131.799	99.9499
-	305	TTS (NR_037421)	0	44.7811	54.8992	0
PMF1-BGLAP	3639	intron (NM_001199664, intron 1 of 4)	12.9283	44.9687	49.6557	28.0079
MYO1D	54526	intron (NM_001303280, intron 1 of 10)	0	25.1952	42.806	0
MIR663AHG	-267	promoter-TSS (NR_040095)	0	25.0199	34.8462	0
EMBP1	223817	Intergenic	32.8762	18.135	13.358	0
LOC441666	263491	Intergenic	0	31.0148	0	0
YWHAQ	-54809	Intergenic	0	0	0	30.4134
MED19	248	promoter-TSS (NR_037646)	30.0225	15.2529	0	0
-	-156	promoter-TSS (NR_106735)	0	16.4399	29.1851	0
ANKRD26P1	209766	Intergenic	0	28.9598	17.849	0
MED19	7357	intron (NM_153450, intron 2 of 3)	26.3652	17.4833	0	0
ZNF733P	794075	Intergenic	0	25.9516	17.1203	0
ANKRD26P1	199395	Intergenic	0	24.328	0	0
ACTR3BP2	161727	Intergenic	0	24.312	0	0
LOC101927151	-547854	Intergenic	0	24.2528	0	0
MTRNR2L9	-314855	Intergenic	23.6194	0	0	0
ANKRD26P1	197525	Intergenic	0	23.5072	12.3306	0
PAK5	-6306	Intergenic	23.3097	0	0	0
ANKRD26P1	196334	Intergenic	0	23.1705	14.4381	0
YWHAQ	-55934	Intergenic	0	0	0	22.8923
ACTR3BP2	194574	Intergenic	0	22.7883	0	0
LOC441666	469065	Intergenic	0	22.3317	0	0
ZNF733P	797084	Intergenic	0	21.8719	0	0
ACTR3BP2	192590	Intergenic	0	21.8255	0	0
ZNF733P	795247	Intergenic	0	21.7738	17.0328	0
LOC441666	478193	Intergenic	0	21.7304	0	0
GCNT1	71209	Intergenic	0	18.493	21.6292	0
DNAJC5B	37454	intron (NM_033105, intron 3 of 5)	21.4878	0	0	0
ANHX	-29299	Intergenic	0	21.2208	0	0
ANKRD26P1	174309	Intergenic	0	21.1858	0	0
LOC105370802	409295	Intergenic	21.0068	0	0	0
ACTR3BP2	183635	Intergenic	0	20.9351	0	0
LINC00680-GUSBP4	-490255	Intergenic	0	20.4258	13.6529	0
ANKRD26P1	195019	Intergenic	0	20.0467	12.4749	0
LINC01986	-54510	Intergenic	0	0	0	19.8008
ANKRD26P1	208983	Intergenic	0	19.7952	13.2044	0
OR4C46	73711	Intergenic	0	19.7568	0	0
PLEKHG4B	-129477	Intergenic	0	17.2195	19.6097	0
OR4C46	75841	Intergenic	0	19.4203	13.3674	0
GYG2P1	1065190	Intergenic	0	19.2164	0	0
ACTR3BP2	180964	Intergenic	0	18.8403	0	0
ROCK1	174450	Intergenic	0	18.7948	0	0
ACTR3BP2	184128	Intergenic	0	18.7682	0	0
-	-752	promoter-TSS (NR_038368)	0	18.7201	0	0
LOC101927151	-551135	Intergenic	0	18.6777	12.0487	0
CWH43	115975	Intergenic	0	18.666	0	0
LINC02405	-105651	Intergenic	0	18.6368	0	0
HFM1	17430	intron (NM_001017975, intron 4 of 38)	10.5629	18.1381	0	11.0422
ACTR3BP2	196170	Intergenic	0	18.1076	17.3124	0
LOC441666	333994	Intergenic	0	17.976	12.9301	0
LOC101928381	48268	intron (NR_135597, intron 4 of 4).3	0	17.9343	9.10089	0
ACTR3BP2	189484	Intergenic	0	15.7629	17.884	0
ROCK1P1	-814	promoter-TSS (NR_033770)	0	17.8802	9.99041	0
ANKRD26P1	204611	Intergenic	0	17.7841	11.8808	0
ANKRD26P1	178994	Intergenic	0	17.7522	15.1968	0
DLG2	143175	intron (NM_001142699, intron 3 of 27)	0	13.1393	17.4932	13.4373
LOC102724580	30255	intron (NR_136300, intron 3 of 3)	0	17.4069	0	0
ANKRD26P1	207109	Intergenic	0	17.3019	10.1161	0
ACTR3BP2	191968	Intergenic	0	17.2993	9.34039	0
KIF3C	15446	intron (NM_002254, intron 1 of 7)	17.2735	0	0	0
ANKRD26P1	181235	Intergenic	0	17.2605	11.2646	0
PID1	51247	intron (NM_001100818, intron 1 of 2)	0	17.0966	0	0
LINC00293	-903975	Intergenic	0	17.0964	0	0
CWH43	162923	Intergenic	0	17.0322	0	0
LINC00293	-898206	Intergenic	0	17.0026	0	0
SPRY3	-192587	Intergenic	0	16.9702	11.3714	0
CWH43	123081	Intergenic	0	16.9643	0	0
MTRNR2L1	232512	Intergenic	0	16.8177	0	0
PDE4D	104415	intron (NM_001165899, intron 3 of 16)	16.7126	0	0	0
MIR663A	-143	promoter-TSS (NR_030386)	0	16.4942	0	0
ACTR3BP2	194201	Intergenic	0	16.4088	0	0
SPRY3	-226755	Intergenic	0	16.263	0	0
LOC441666	328785	Intergenic	0	16.2547	0	0
ANKRD26P1	202183	Intergenic	0	16.1981	8.36111	0
ANKRD26P1	215082	Intergenic	0	16.1306	14.521	0
SULF1	97293	intron (NM_030958, intron 6 of 9)	0	16.0127	0	0
ANKRD26P1	198616	Intergenic	0	15.9908	13.5856	0
CWH43	647650	Intergenic	0	15.8301	13.8942	0
ACTR3BP2	191119	Intergenic	0	15.1604	15.7975	0
ANKRD26P1	178110	Intergenic	0	15.7845	13.1727	0
SPRY3	-188971	Intergenic	0	15.7767	0	0
CARTPT	131857	Intergenic	0	15.6919	0	0
CCDC144B	9348	intron (NR_036647, intron 2 of 16)	15.6911	0	0	0
LOC101927151	-552264	Intergenic	0	15.6367	0	0
LOC441666	492929	Intergenic	0	0	15.6277	0
OR4C46	71657	Intergenic	0	15.3272	0	0
DDX11L16	-2344	Intergenic	0	0	15.3256	0
ANKRD26P1	211267	Intergenic	0	15.2357	11.7501	0
OR4C46	67618	Intergenic	0	15.1979	0	0
ANKRD26P1	208059	Intergenic	0	15.1469	11.2849	0
ANKRD26P1	170355	Intergenic	0	14.7313	15.0761	0
SPRY3	-278166	Intergenic	0	14.9741	7.675	0
SPRY3	-274895	Intergenic	0	14.8328	0	0
SPRY3	-253441	Intergenic	0	14.7517	11.8657	0
LOC441666	266499	Intergenic	0	14.6923	9.27596	0
ACTR3BP2	178842	Intergenic	0	14.5671	6.09966	0
OR4C46	69652	Intergenic	0	14.3941	0	0
CWH43	160763	Intergenic	0	13.2108	14.2897	0
LINC00685	3139	Intergenic	0	0	14.2361	0
LOC101927151	-545830	Intergenic	0	14.1414	0	0
ANKRD26P1	213214	Intergenic	0	14.122	8.22823	0
ACTR3BP2	195190	Intergenic	0	11.3605	14.0952	0
TPTE	171375	Intergenic	0	11.5649	14.0233	0
SPRY3	-187004	Intergenic	0	13.8969	0	0
ANKRD26P1	180114	Intergenic	0	13.872	10.4564	0
CENPBD1P1	33231813	Intergenic	13.7503	0	0	0
ACTR3BP2	187166	Intergenic	0	13.6952	8.45402	0
LOC441666	463008	Intergenic	0	13.6552	10.0199	0
SPRY3	-217562	Intergenic	0	13.571	0	0
LINC00486	-10837	intron (NR_027099, intron 5 of 5)	0	9.00881	13.5045	0
CENPBD1P1	33233774	Intergenic	13.423	0	0	0
ROCK1	171793	Intergenic	0	13.4154	0	0
SPRY3	-224804	Intergenic	0	13.315	12.1405	0
ANGPT1	51070	intron (NM_001199859, intron 6 of 8)	0	0	0	13.2155
CENPBD1P1	33237710	Intergenic	13.1158	0	0	0
SPRY3	-256792	Intergenic	0	13.0988	0	0
SPRY3	-235373	Intergenic	0	13.0614	0	0
ATP4A	-12044	Intergenic	0	12.9398	0	0
CWH43	121801	Intergenic	0	12.9227	0	0
FAM74A6	6640122	Intergenic	0	0	0	12.833
SPRY3	-204389	Intergenic	0	12.7834	0	0
LOC441666	464803	Intergenic	0	12.7162	0	0
EHMT1	-46719	intron (NM_024757, intron 2 of 26)	0	12.7118	0	0
CHEK2P2	-181822	Intergenic	0	12.6371	0	0
CGN	76	promoter-TSS (NM_020770)	12.6053	0	0	0
MIR4436A	758059	Intergenic	0	0	12.4585	0
SPRY3	-242570	Intergenic	0	12.4312	0	0
LOC101928381	46676	intron (NR_135597, intron 4 of 4).2	0	12.4029	0	0
SPRY3	-228170	Intergenic	0	12.4019	0	0
CWH43	661538	Intergenic	0	12.3042	0	0
CHEK2P2	-180274	Intergenic	0	12.3023	0	0
SPRY3	-215781	Intergenic	0	0	12.2582	0
DEFB115	-15909	Intergenic	0	0	12.1	0
LINC01193	168073	Intergenic	0	12.0931	0	0
SPRY3	-246282	Intergenic	0	12.0094	10.7159	0
LOC101927151	-549859	Intergenic	0	11.9889	0	0
MTRNR2L1	238199	Intergenic	0	10.7199	11.9658	0
LOC654342	1366012	Intergenic	0	11.9504	0	0
ANKRD26P1	167693	Intergenic	0	11.8567	7.22782	0
CWH43	650911	Intergenic	0	11.8272	0	0
ANKRD26P1	200055	Intergenic	0	11.8121	0	0
SPRY3	-203017	Intergenic	0	11.779	0	0
PAK5	-7203	Intergenic	11.6723	0	0	0
SPRY3	-201872	Intergenic	0	11.6459	0	0
LOC441666	467445	Intergenic	0	11.6323	0	0
SPRY3	-187950	Intergenic	0	11.5216	0	0
ROCK1	172586	Intergenic	0	11.5214	6.28726	0
LOC101926962	-22714	intron (NM_001098518, intron 8 of 20)	0	0	0	11.5144
ACTR3BP2	140450	Intergenic	0	11.3493	0	0
ACTR3BP2	184753	Intergenic	0	11.2995	0	0
MTRNR2L1	236027	Intergenic	0	11.2155	0	0
ANKRD26P1	189853	Intergenic	0	11.2064	10.2129	0
POTEA	688790	Intergenic	0	11.2047	9.04139	0
SPRY3	-266637	Intergenic	0	11.1908	0	0
UNC45B	2919	intron (NM_173167, intron 3 of 18)	0	11.1335	0	0
SPRY3	-273963	Intergenic	0	11.0726	0	0
ACTR3BP2	188132	Intergenic	0	10.9875	0	0
SPRY3	-211948	Intergenic	0	10.9831	9.88677	0
ROCK1P1	741	intron (NR_033770, intron 1 of 4)	0	10.8818	0	0
ACTR3BP2	178222	Intergenic	0	10.8795	9.72846	0
ACTR3BP2	181530	Intergenic	0	10.8766	0	0
MTRNR2L1	233682	Intergenic	0	10.8346	0	0
LOC654342	1362747	Intergenic	0	10.7627	0	0
SPRY3	-234655	Intergenic	0	8.76379	10.6208	0
LOC441666	474109	Intergenic	0	10.5728	10.1302	0
SPRY3	-279472	Intergenic	0	10.553	0	0
ANKRD26P1	169149	Intergenic	0	10.5175	0	0
ZXDA	-635934	Intergenic	0	10.4962	0	0
MIR4436A	763006	Intergenic	0	10.4222	0	0
GYG2P1	1075387	Intergenic	0	10.3176	0	0
ZNF595	-42497	Intergenic	10.1274	0	0	0
SPRY3	-213088	Intergenic	0	10.1081	0	0
MTRNR2L1	230740	Intergenic	0	10.0611	0	0
SPRY3	-268423	Intergenic	0	7.99578	10.042	0
ANKRD30BL	-7750	Intergenic	0	9.99539	0	0
POTEA	676829	Intergenic	0	9.99158	0	0
SPRY3	-196409	Intergenic	0	9.93186	0	0
SPRY3	-198728	Intergenic	0	0	9.92473	0
SPRY3	-249873	Intergenic	0	9.86031	0	0
CHRM5	-297305	intron (NM_001243996, intron 38 of 102)	9.85326	0	0	0
POTEA	679504	Intergenic	0	9.81785	0	0
ZNF595	-41622	Intergenic	9.78891	0	0	0
SPRY3	-228933	Intergenic	0	9.78602	8.79978	0
CYTOR	-110576	Intergenic	0	9.76277	0	0
FAM74A6	6599743	Intergenic	0	0	0	9.74642
MTRNR2L1	228939	Intergenic	0	9.69438	0	0
ANKRD26P1	182605	Intergenic	0	9.64137	0	0
TP53TG3B	-22817	Intergenic	0	9.58071	0	0
SPRY3	-199671	Intergenic	0	9.55251	0	0
SPRY3	-270120	Intergenic	0	9.45689	0	0
LINC00293	-908221	Intergenic	0	9.29723	0	0
LINC00293	-896376	Intergenic	0	9.17542	0	0
LINC00293	-902971	Intergenic	0	9.16696	8.49849	0
SPRY3	-261517	Intergenic	0	9.05486	0	0
LOC286178	-77052	Intergenic	0	0	0	8.91717
CWH43	528358	Intergenic	0	8.89706	0	0
FKTN	-22703	intron (NM_001287192, intron 11 of 12)	8.61721	0	0	0
SPRY3	-207645	Intergenic	0	8.60458	0	0
LOC441666	325833	Intergenic	0	8.59306	0	0
CHEK2P2	-176968	Intergenic	0	8.57539	0	0
LOC441666	475092	Intergenic	0	8.41969	0	0
SPRY3	-263313	Intergenic	0	8.29631	0	0
CWH43	150586	Intergenic	0	8.25721	0	0
SPRY3	-273026	Intergenic	0	8.15099	0	0
SPRY3	-239340	Intergenic	0	8.02782	7.74155	0
SPRY3	-270623	Intergenic	0	7.75484	0	0
SPRY3	-277517	Intergenic	0	7.70085	0	0
FAM74A6	6593388	Intergenic	0	0	0	7.65953
LOC441666	265611	Intergenic	0	7.62442	0	0
ACTR3BP2	162360	Intergenic	0	7.60233	0	0
POTEA	689855	Intergenic	0	7.56799	0	0
FAM27C	2770	Intergenic	0	7.52055	0	0
SPRY3	-192116	Intergenic	0	7.4558	0	0
ACTR3BP2	167148	Intergenic	0	7.44937	0	0
SPRY3	-216866	Intergenic	0	7.44362	0	0
-	9221	Intergenic	0	7.39004	0	0
POTEA	684142	Intergenic	0	7.21362	0	0
FAM74A6	6624721	Intergenic	0	0	0	7.10398
POTEA	680454	Intergenic	0	7.08359	0	0
ROCK1P1	1457	intron (NR_033770, intron 1 of 4)	0	7.07953	0	0
POTEA	677173	Intergenic	0	6.69299	0	0
LOC441666	479916	Intergenic	0	6.68351	0	0

## Sheet: FLAG peaks in control LNCaP
FLAG peaks in control LNCaP cells +/- R1881 - related to venn diagrams in Supplemental Figure S8C
Gene Name	Distance	Annotation	FLAG control LNCaP vehicle score	FLAG control LNCaP R1881 score
-	297	TTS (NR_037421)	94.1061	97.3526
PMF1-BGLAP	3655	intron (NM_001199664, intron 1 of 4)	64.7635	75.5439
MIR663A	-195	promoter-TSS (NR_030386)	32.5242	51.9725
MIR663AHG	-287	promoter-TSS (NR_040095)	51.2879	39.774
NEAT1	2906	non-coding (NR_028272, exon 1 of 1)	50.1329	43.7232
MASCRNA	-2227	non-coding (NR_002819, exon 1 of 1)	47.1656	37.4778
MYO1D	54552	intron (NM_001303280, intron 1 of 10)	38.7002	45.5877
HFM1	17457	intron (NM_001017975, intron 4 of 38)	40.0385	32.4768
GCNT1	71211	Intergenic	31.2745	38.8259
KCNQ2	-12862	Intergenic	35.1657	37.8067
DLG2	143157	intron (NM_001142699, intron 3 of 27)	35.3332	25.8003
-	-792	promoter-TSS (NR_038368)	33.5515	24.3887
LINC01249	-459126	Intergenic	30.3066	32.0401
-	-162	promoter-TSS (NR_106735)	31.5497	21.9038
ADAMTS1	10391	Intergenic	29.9681	30.3487
WDR74	-1559	Intergenic	29.6313	19.1435
MIR663B	2083	intron (NR_027020, intron 1 of 4)	23.5128	28.9024
LOC79999	-25604	Intergenic	27.5971	16.5432
UNC45B	2922	intron (NM_173167, intron 3 of 18)	26.2518	25.0341
LINC00685	3116	Intergenic	25.6676	16.7317
SULF1	97292	intron (NM_030958, intron 6 of 9)	25.0625	15.1556
GRAP	-15069	Intergenic	24.9799	17.6511
GRAPL	-15081	Intergenic	22.682	24.927
ZNF580	90	promoter-TSS (NM_001163423)	23.865	16.794
LINC00854	-12304	Intergenic	23.6409	13.8167
DLEC1	45257	intron (NM_001321153, intron 7 of 36)	16.6301	23.4709
LOC388692	-63020	Intergenic	23.2605	0
CARTPT	131841	Intergenic	23.1349	22.686
LINC02405	-105788	Intergenic	23.0391	18.7057
-	-1460	Intergenic	22.1932	16.8708
ATP4A	-12083	Intergenic	22.1242	14.7336
LINC00910	27680	Intergenic	22.0368	16.4024
PID1	51256	intron (NM_001100818, intron 1 of 2)	17.9084	21.9182
SNORA4	2972	TTS (NM_001967)	21.8767	18.1406
ADAMTS1	8061	3' UTR (NM_006988, exon 9 of 9)	18.4302	21.8709
PDE3A	-20371	intron (NM_000921, intron 1 of 15)	21.0528	12.6398
LOC79999	-25605	Intergenic	20.9493	16.6279
GRAP	-16854	Intergenic	20.5281	14.9797
PLEKHG4B	-129457	Intergenic	17.9335	20.3442
PPIAL4E	-39104	intron (NM_001037501, intron 6 of 19)	18.3807	20.1955
DDX11L16	-2355	Intergenic	0	19.4559
LINC01783	21444	Intergenic	19.3707	15.389
UBC	4561	Intergenic	18.6392	19.2422
ANKRD30BL	262	promoter-TSS (NR_031608)	19.104	13.4415
SLC25A10	-24	promoter-TSS (NM_001270888)	18.6343	0
EAPP	-16494	Intergenic	17.3691	18.5231
EAPP	-7070	Intergenic	17.9619	18.5217
SNORD141A	1399	3' UTR (NM_001402, exon 8 of 8)	18.3991	16.2127
TTTY23B	285109	Intergenic	17.6638	0
SNORD141A	4061	Intergenic	17.653	0
TNFRSF6B	-3068	intron (NM_001283010, intron 29 of 33)	17.3024	10.5215
FCGR2A	-43209	Intergenic	14.3858	17.3018
RNVU1-19	188	TTS (NR_104086)	17.2494	0
GALC	221893	Intergenic	13.8518	16.4259
CLK3	304	5' UTR (NM_001130028, exon 1 of 13)	16.3619	12.4913
MAZ	-460	promoter-TSS (NM_001276276)	15.6518	16.2424
CLDN4	1500	3' UTR (NM_001305, exon 1 of 1)	16.236	13.3242
PDZK1P1	-23938	intron (NR_104217, intron 2 of 17)	10.5531	16.1804
DDX11L16	-2376	Intergenic	0	16.1562
LINC00685	3072	Intergenic	13.7992	15.9221
CTBP1-AS	14086	intron (NM_001012614, intron 5 of 9)	0	15.4884
CTBP1-AS	13125	intron (NM_001012614, intron 5 of 9)	0	15.4676
TEX14	32904	intron (NM_198393, intron 1 of 32)	15.3308	11.3644
RNVU1-19	258	TTS (NR_104086).2	15.2957	0
DALRD3	526	exon (NM_001009996, exon 2 of 12)	15.0762	8.54864
ZNF254	-32016	Intergenic	15.0283	0
NKX3-1	4577	TTS (NM_001256339)	0	14.6849
ANHX	-29273	Intergenic	0	14.6269
TTTY23B	289449	Intergenic	14.5182	11.97
CIRBP	250	intron (NM_001300829, intron 1 of 5)	14.4205	10.1244
ZC3H10	-98	promoter-TSS (NM_001303124)	14.4083	8.67299
LOC105376805	-6494	Intergenic	13.0568	14.1518
FAM231C	-6098	Intergenic	14.0495	0
ARHGDIA	2999	non-coding (NR_125441, exon 5 of 5)	13.7436	0
ACP4	4001	intron (NM_033068, intron 8 of 10)	0	13.704
SNORD68	4640	3' UTR (NM_001243130, exon 6 of 6)	13.673	0
SNORD22	1592	TTS (NR_003098)	13.5901	9.67212
SNORA73B	2118	non-coding (NR_002909, exon 3 of 3)	13.5054	10.2399
ATF4	2508	TTS (NM_001675)	13.4789	12.0157
EEF2KMT	-499	promoter-TSS (NM_001289029)	13.383	0
TM7SF2	810	TTS (NM_013265)	13.3779	0
MRPL28	137	TTS (NM_021259)	13.3378	0
EPPK1	12130	exon (NM_031308, exon 2 of 3)	13.3004	0
PDZK1P1	-23896	Intergenic	13.2713	0
CTBP1	17858	intron (NM_001012614, intron 3 of 9)	0	13.2446
SNORD60	1791	intron (NM_014353, intron 8 of 8)	13.2103	9.5035
NBPF15	43996	intron (NR_104217, intron 2 of 17).2	0	13.094
MIR1244-2	1030	TTS (NM_001099285)	0	13.0457
ZNF467	1656	intron (NM_207336, intron 1 of 4)	12.9614	0
MYC	5893	TTS (NM_002467)	12.9192	0
SYNRG	-44	promoter-TSS (NM_001163547)	12.911	0
ZNF276	-271	promoter-TSS (NR_110129)	12.8662	8.53176
KIF2C	-8777	Intergenic	12.8081	0
FARP2	-353	promoter-TSS (NM_001282983)	12.7621	0
SNORA4	1752	TTS (NM_181573)	12.6561	0
SNORD36C	1505	TTS (NM_000972)	12.5815	12.2864
ZNF581	157	TTS (NM_001163423)	0	12.3954
MIR5087	-84	promoter-TSS (NR_049810)	12.382	0
FCGR2A	-58091	Intergenic	12.3221	10.0024
SNORA70	1113	TTS (NR_000011)	12.1705	0
EHMT1	-46697	intron (NM_024757, intron 2 of 26)	0	12.0746
NAT10	-66	promoter-TSS (NM_001144030)	12.0205	9.91134
SNORD141A	2414	3' UTR (NM_001402, exon 8 of 8)	11.9612	0
POLG2	-155	promoter-TSS (NM_007215)	11.9463	0
LINC01193	167989	Intergenic	11.9432	0
PHPT1	549	non-coding (NR_109807, exon 1 of 3)	11.8109	0
CTBP1	19361	intron (NM_001012614, intron 3 of 9)	0	11.792
SPRY3	-246338	Intergenic	0	11.7566
GPT	-3023	intron (NM_001329443, intron 10 of 11)	10.2981	11.7523
SNORA10	1087	TTS (NM_002952)	11.7444	0
HNRNPA2B1	13155	TTS (NM_004289)	11.7352	10.9074
SCRIB	-586	promoter-TSS (NM_182706)	0	11.6975
MIR3175	38	promoter-TSS (NR_036136)	9.90955	11.6891
RAD23A	-139	promoter-TSS (NM_005053)	0	11.6698
SNAPC5	-29	promoter-TSS (NM_001329615)	11.6301	0
KCNQ2	-10631	Intergenic	11.6203	0
TXNIP	3620	TTS (NM_006472)	11.589	0
MX1	29513	Intergenic	0	11.5398
SNORD12	2129	intron (NR_003605, intron 4 of 4)	11.3954	0
MXRA8	4095	exon (NM_001282585, exon 6 of 10)	11.2639	0
CDK11B	-19	promoter-TSS (NM_033487)	0	11.1528
RPS28	2694	intron (NM_198471, intron 10 of 10)	11.1339	0
BTRC	10869	intron (NM_003939, intron 1 of 13)	11.064	0
LOC100130417	5661	Intergenic	10.8644	0
SNORD12	2875	intron (NR_003605, intron 4 of 4)	0	10.864
MIR141	1270	TTS (NR_135032)	0	10.8267
EEF1A1	640	intron (NM_001402, intron 1 of 7)	10.8097	0
SREBF1	-3282	Intergenic	10.7326	0
SNORD12	408	TTS (NR_003695)	10.6395	9.2279
GAS5-AS1	-1249	Intergenic	10.6065	0
SNORD60	598	TTS (NM_001308053)	10.4352	0
SNORD83B	2748	Intergenic	10.3399	0
MED19	277	promoter-TSS (NR_037646)	10.1832	0
UBC	392	promoter-TSS (NR_049820)	10.0885	0
THUMPD3-AS1	-275	promoter-TSS (NR_132781)	0	10.0667
PPP1R10	2283	intron (NM_002714, intron 2 of 19).5	0	10.002
DNAJC9	214	promoter-TSS (NR_038373)	9.99147	0
FBXL17	-282	promoter-TSS (NM_001163315)	0	9.8255
C12orf57	522	intron (NM_138425, intron 1 of 2)	0	9.7788
DVL1	-4517	exon (NM_001282584, exon 9 of 9)	9.71474	0
SYCE2	-79	promoter-TSS (NM_001105578)	0	9.69688
HMGN4	-706	promoter-TSS (NM_006353)	0	9.61841
BAIAP3	6954	intron (NM_001199097, intron 14 of 33)	0	9.51084
MXRA8	1066	intron (NM_001282582, intron 1 of 10)	0	9.47763
SIRT4	-10559	Intergenic	9.41413	0
ZBTB45	473	5' UTR (NM_001316978, exon 1 of 3)	0	9.35226
WBP1L	21	promoter-TSS (NM_001083913)	0	9.33618
FAM83E	-1494	TTS (NM_000979)	9.30885	0
ACTG1	3414	TTS (NR_037688)	0	9.25489
FCGR2A	-35912	Intergenic	9.05257	0
TP53TG3	-23052	Intergenic	0	8.82365
WDR6	192	TTS (NM_177939)	8.80149	0
SNORD12	3383	intron (NR_003605, intron 4 of 4)	0	8.74302
COMP	28612	intron (NM_001098482, intron 9 of 14)	8.71641	0
MIR7-1	4629	Intergenic	0	8.60834
SNORD141B	-351	promoter-TSS (NR_132980).2	8.60649	0
PARP16	-17910	Intergenic	0	8.58179
SPDEF	19605	Intergenic	8.46298	0
TTTY23B	288067	Intergenic	8.0511	0
CFAP69	-94	promoter-TSS (NM_001160138)	0	7.65641
KLK3	6808	TTS (NM_001648)	0	7.22389
METRN	1416	intron (NM_024042, intron 2 of 3)	0	6.80792
